# Supplementary material for: Visible light induced deoxygenation of sulfoxides with isopropanol
Source: Royal Society of Chemistry journal article supplement (doi:10.1039/d3qo01232h), 2023-01-01

– Supporting Information–

## Visible Light Induced Deoxygenation of Sulfoxides with Isopropanol

Jinwu Zhao, <sup>\*a</sup> Zhigao Luo, <sup>a</sup> Yipeng Liu, <sup>a</sup> Shiting Chen, <sup>a</sup> Junye He, <sup>a</sup> Jingxiu Xu, <sup>a</sup> Weigao Hu, <sup>a</sup>  
Zunnan Huang <sup>\*b</sup> and Wenfang Xiong <sup>\*a</sup>

<sup>a</sup> School of Pharmacy, Guangdong Medical University, Dongguan 523808, China.

E-mail: jwzhao@gdmu.edu.cn, xiongwf@gdmu.edu.cn

<sup>b</sup> Key Laboratory of Computer-Aided Drug Design of Dongguan City, Guangdong Medical University, Dongguan 523808, China. Email: zn\_huang@gdmu.edu.cn.

### Table of Contents

|                                                                       |     |
|-----------------------------------------------------------------------|-----|
| <b>1. General information</b> .....                                   | S1  |
| <b>2. Preparation of starting material</b> .....                      | S1  |
| <b>3. Experimental setup</b> .....                                    | S1  |
| <b>4. Typical procedure for the deoxygenation of sulfoxides</b> ..... | S1  |
| <b>5. Gram scale synthesis</b> .....                                  | S1  |
| <b>6. Mechanistic Studies</b> .....                                   | S2  |
| <b>6.1 Radical trapping experiments</b> .....                         | S2  |
| <b>6.2 Parallel KIE experiments</b> .....                             | S5  |
| <b>6.3 Light on/off experiments</b> .....                             | S6  |
| <b>6.4 Cyclic voltammetry experiments</b> .....                       | S6  |
| <b>7. Analytic data of the obtained compounds</b> .....               | S7  |
| <b>8. References</b> .....                                            | S13 |
| <b>9. Copies of NMR spectra</b> .....                                 | S15 |

### 1. General information

All reagents were of analytical grade and obtained from commercial suppliers and used without further purification (except **a22**).  $^1\text{H}$  and  $^{13}\text{C}$  NMR spectra were obtained on a Bruker AVANCE III HD 400 at 400 MHz and 100 MHz respectively, using  $\text{CDCl}_3$  or  $\text{DMSO-d}_6$  as the solvent with tetramethylsilane (TMS) as an internal standard at room temperature. GC-MS were performed on Thermo Trace DSQ. Column chromatography was performed using silica gel (200–300 mesh). A 25 W LED light source was assembled from 430–440 nm 2835 LED beads with a peak wavelength of 435 nm without the use of any filter (Planck ShenZhen Opto-Electronic Technology Co.,Ltd).

### 2. Preparation of starting material

The sulfoxide 1-methyl-3-(methylsulfinyl)benzene (**a22**) was synthesized according to the previously reported procedure.<sup>2</sup> Its NMR data is in entire agreement with previous descriptions.<sup>18</sup>  $^1\text{H}$  NMR (400 MHz,  $\text{CDCl}_3$ )  $\delta$  7.44 (s, 1H), 7.39 – 7.33 (m, 2H), 7.24 (m, 1H), 2.66 (s, 3H), 2.38 (s, 3H).  $^{13}\text{C}$  NMR (101 MHz,  $\text{CDCl}_3$ )  $\delta$  145.5, 139.6, 131.8, 129.1, 123.7, 120.6, 43.9, 21.4.

### 3. Experimental setup

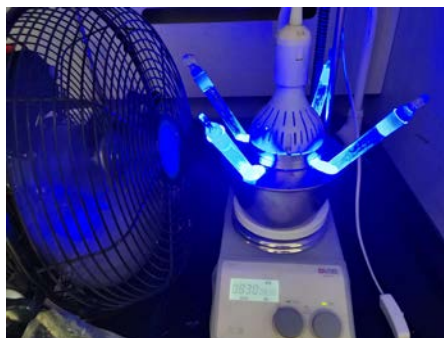

### 4. Typical procedure for the deoxygenation of sulfoxides

To a quartz test-tube (25 mL) were added AQ (10.4 mg, 0.05 mmol), TEAF (dihydrate, 4.6 mg, 0.025 mmol), sulfoxide **a** (0.5 mmol) and 2 mL of mixed solvent (sulfolane /*i*-PrOH = 3:1). The reaction mixture was stirred at room temperature under the irradiation at 430–440 nm (25 W LED, distance = 8–10 cm, cooling by air) for 12 h. After this, the reaction was quenched by the addition of 10 mL of water, and the aqueous solution was extracted with  $\text{CH}_2\text{Cl}_2$  ( $3 \times 10$  mL). The combined extract was dried with anhydrous  $\text{MgSO}_4$  and evaporated under vacuum. The residue was purified by a silica gel packed flash chromatography column to afford the desired sulfide **b**.

### 5. Gram scale synthesis

To a quartz test-tube (50 mL) were added AQ (104.1 mg, 0.5 mmol), TEAF (dihydrate, 46.3 mg, 0.25 mmol), di-*n*-octyl sulfoxide (**a2**) (1.37 g, 5 mmol) and 20 mL of mixed solvent (sulfolane /*i*-PrOH = 3:1). The reaction mixture was stirred at room temperature under the irradiation at 430–440 nm (25 W LED  $\times$  3, distance = 8 cm, cooling by air) for 12 h. After that, the reaction mixture was transferred to a separating funnel and diluted with  $\text{CH}_2\text{Cl}_2$  (100 mL). The organic phase was washed three times with water, dried over  $\text{MgSO}_4$  and concentrated. The crude product was purified by a silica gel packed flash chromatography column with pure hexane as the eluent to give **b2** (1.05 g, 81% yield).

## 6. Mechanistic Studies

### 6.1 Radical trapping experiments

The trapping products of radical intermediate were detected by HRMS (thermo fisher Q Exactive, using APCI in negative ion mode)

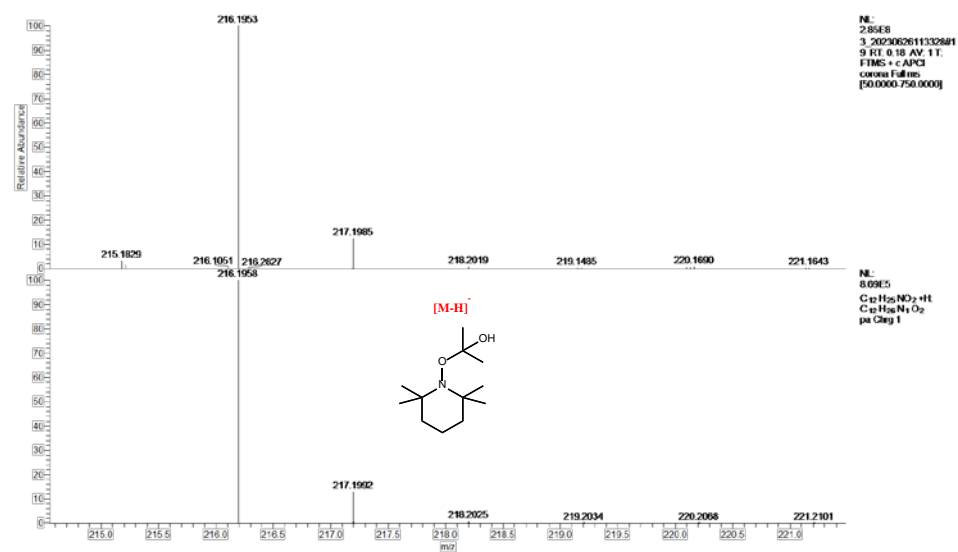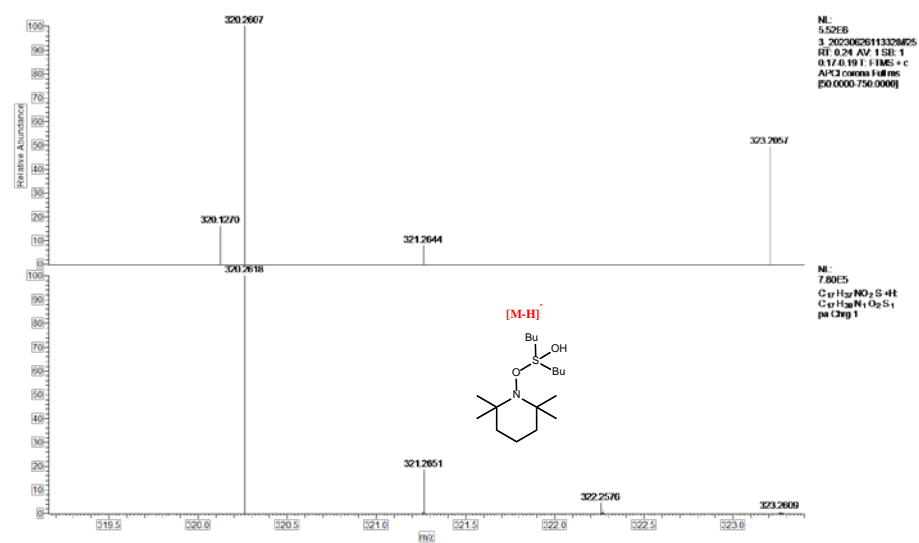

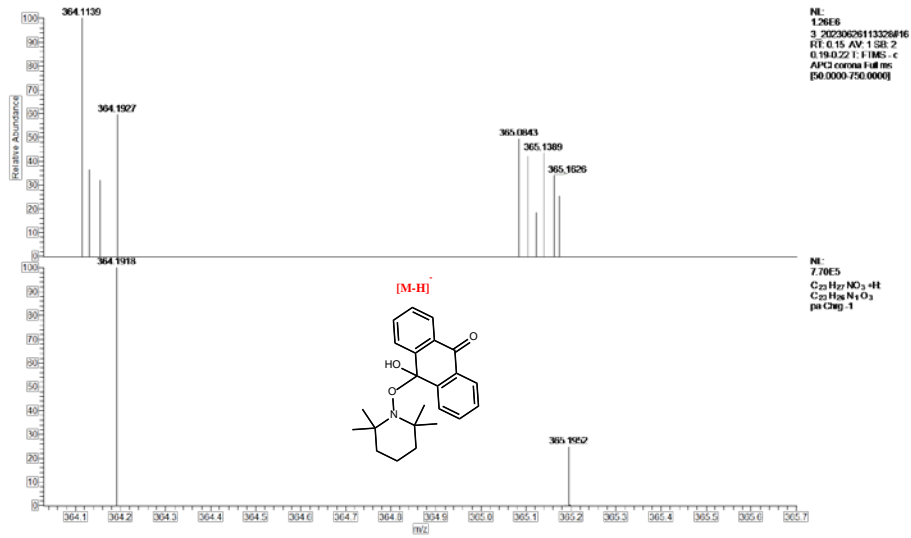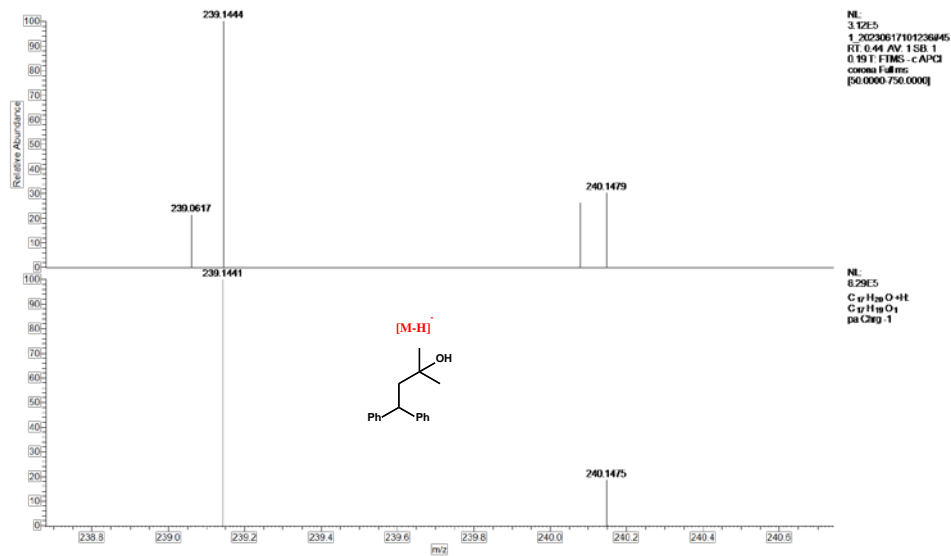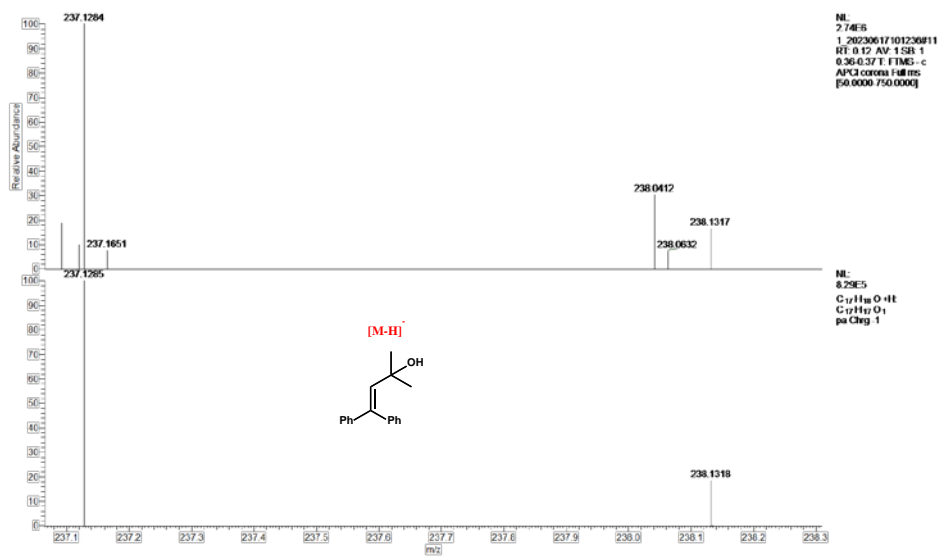

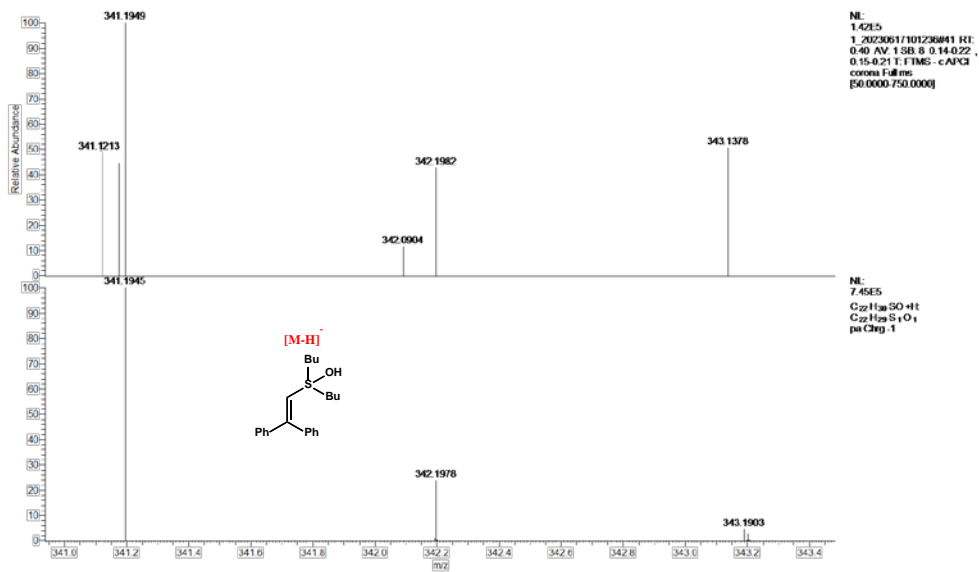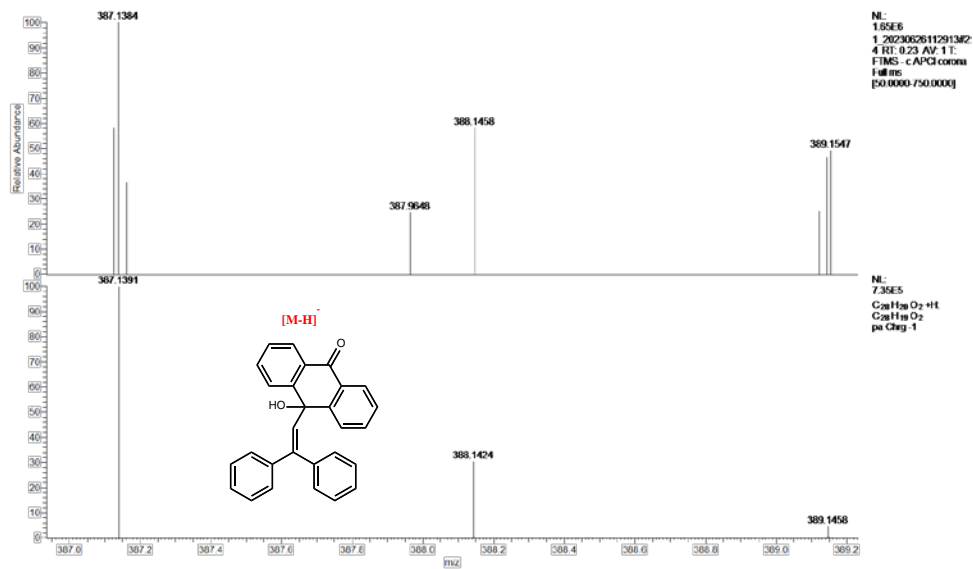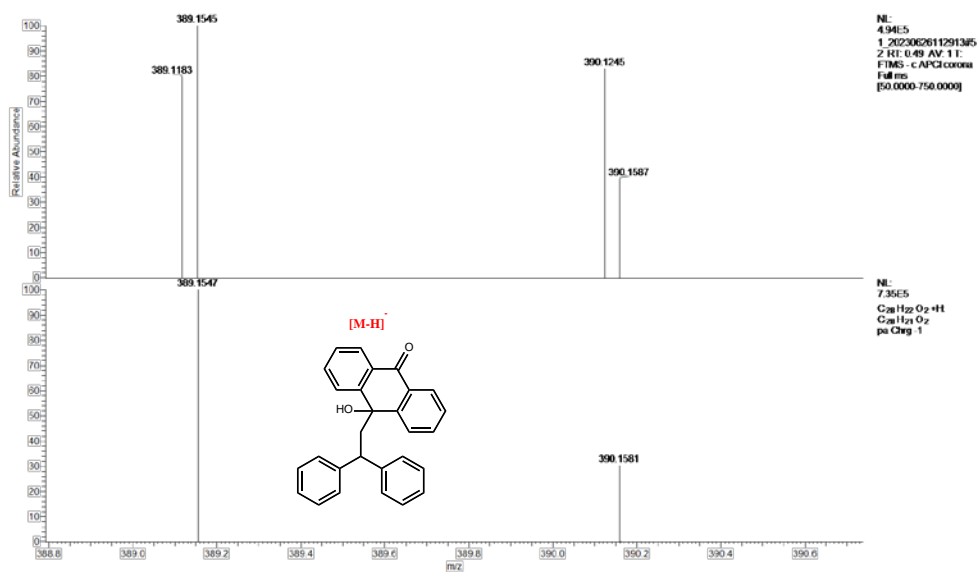

## 6.2 Parallel KIE experiments

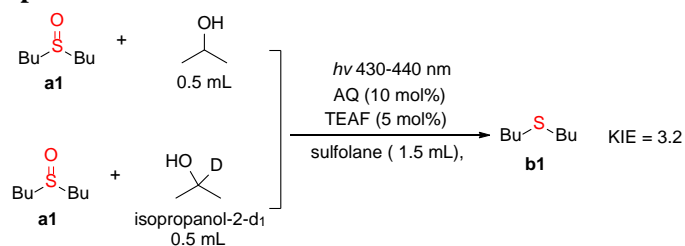

To a quartz test-tube (25 mL) were added AQ (10.4 mg, 0.05 mmol), TEAF (dihydrate, 4.6 mg, 0.025 mmol), sulfoxide **a** (0.5 mmol), isopropanol or isopropanol-2-d<sub>1</sub> (0.5 mL) and sulfolane (1.5 mL). The reaction mixture was stirred at room temperature under the irradiation at 430–440 nm (25 W LED, distance = 8–10 cm, cooling by air) for indicated time. Then, the reaction was quenched by the addition of 10 mL of water, and the aqueous solution was extracted with CH<sub>2</sub>Cl<sub>2</sub> (3 × 10 mL). The combined extract was dried with anhydrous MgSO<sub>4</sub>. After filtration and evaporation, the obtained crude mixture was analyzed by GC/MS using *n*-dodecane as an internal standard.

|       | Time (h)                     | 2     | 4     | 6     | 8     |
|-------|------------------------------|-------|-------|-------|-------|
| Yield | isopropanol                  | 19.21 | 30.43 | 44.86 | 68.25 |
|       | isopropanol-2-d <sub>1</sub> | 7.52  | 10.23 | 15.46 | 22.38 |

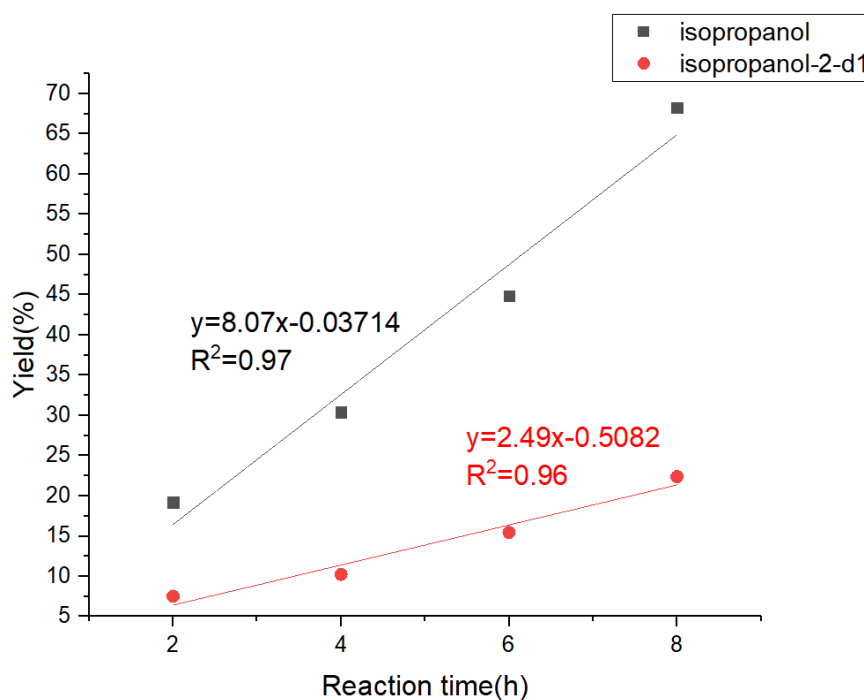

### 6.3 Light on/off experiments

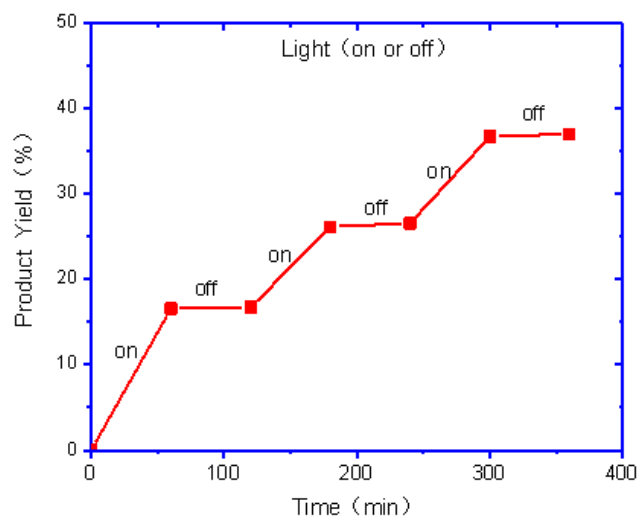

### 6.4 Cyclic voltammetry experiments

Cyclic voltammetry (CV) experiments of isopropanol and dibutyl sulfoxide were recorded on a Bio-Logic VMP-300 multi-channel electrochemical workstation using the three-electrode cell with a rate of  $20 \text{ mV s}^{-1}$  in  $\text{CH}_3\text{CN}$  solution ( $N,N,N$ -tributylbutan-1-amium hexafluorophosphate,  $0.1 \text{ mol mL}^{-1}$ ) and bubbling with nitrogen for two minutes. In which glassy carbon electrode (GCE) was used as a working electrode,  $\text{Ag}/\text{AgCl}$  and  $\text{KCl}$  (sat.) worked as the reference electrode, and platinum disk as the counter electrode.

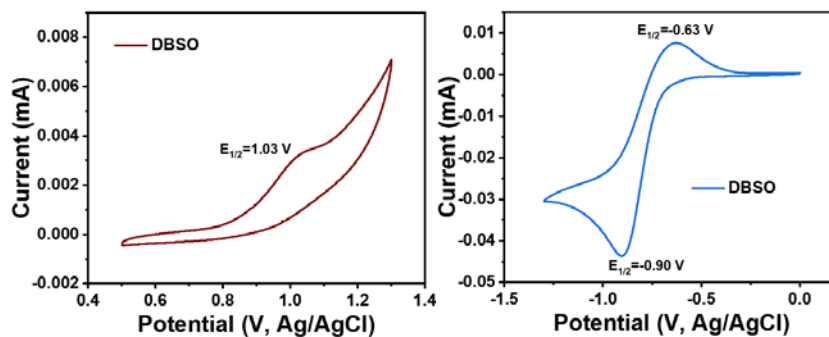

(a) CV curves of dibutyl sulfoxide (DBSO)

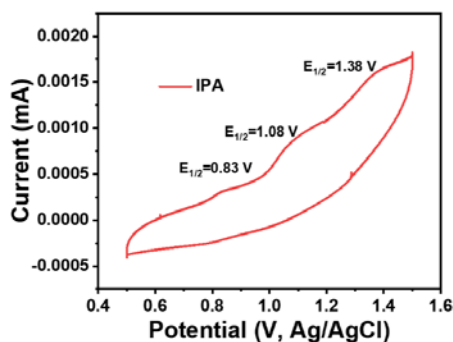

(b) CV curves of isopropanol

## 7. Analytic data of the obtained compounds

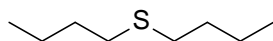

### dibutyl sulfide (b1) <sup>1</sup>

Yield: 60.7 mg, 83% (99% GC yield); colorless oil; pure hexane; <sup>1</sup>H NMR (400 MHz, CDCl<sub>3</sub>) δ 2.53 (t, *J* = 7.4 Hz, 2H), 1.59 (p, *J* = 7.4 Hz, 2H), 1.43 (h, *J* = 7.3 Hz, 2H), 0.94 (t, *J* = 7.3 Hz, 3H). <sup>13</sup>C NMR (101 MHz, CDCl<sub>3</sub>) δ 31.8, 22.0, 13.7.

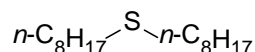

### dioctyl sulfide (b2) <sup>2</sup>

Yield: 117.6 mg, 91%; colorless oil; pure hexane; <sup>1</sup>H NMR (400 MHz, CDCl<sub>3</sub>) δ 2.50 (t, *J* = 7.6 Hz, 4H), 1.58 (m, 4H), 1.45 – 1.18 (m, 20H), 0.87 (t, *J* = 7.2 Hz, 6H). <sup>13</sup>C NMR (101 MHz, CDCl<sub>3</sub>) δ 32.2, 31.8, 29.8, 29.2, 29.0, 22.7, 14.1.

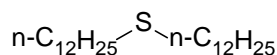

### didodecyl sulfide (b3) <sup>3</sup>

Yield: 148.3 mg, 80%; colorless oil; pure hexane; <sup>1</sup>H NMR (400 MHz, CDCl<sub>3</sub>) δ 2.49 (t, *J* = 8.5 Hz, 4H), 1.57 (t, *J* = 7.8 Hz, 4H), 1.38 (d, *J* = 7.3 Hz, 4H), 1.26 (m, 32H), 0.88 (t, *J* = 6.8 Hz, 6H). <sup>13</sup>C NMR (101 MHz, CDCl<sub>3</sub>) δ 32.2, 31.9, 29.8, 29.7, 29.6, 29.4, 29.3, 29.0, 22.7, 14.1.

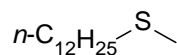

### dodecyl methyl sulfide (b4) <sup>1</sup>

Yield: 94.1 mg, 87%; colorless oil; pure hexane; <sup>1</sup>H NMR (400 MHz, CDCl<sub>3</sub>) δ 2.49 (t, *J* = 7.4 Hz, 2H), 2.10 (s, 3H), 1.60 (p, *J* = 7.3 Hz, 2H), 1.38 (t, *J* = 7.3 Hz, 2H), 1.27 (m, 16H), 0.89 (t, *J* = 6.7 Hz, 3H). <sup>13</sup>C NMR (101 MHz, CDCl<sub>3</sub>) δ 34.3, 31.9, 29.6, 29.6, 29.6, 29.5, 29.3, 29.2, 29.1, 28.8, 22.6, 15.4, 14.0.

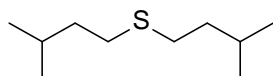

### diisopentyl sulfide (b5) <sup>4</sup>

Yield: 75.0 mg, 86% (95% GC yield); colorless oil; pure hexane; <sup>1</sup>H NMR (400 MHz, CDCl<sub>3</sub>) δ 2.52 (t, 4H), 1.74 – 1.62 (m, 2H), 1.47 (q, *J* = 7.3 Hz, 4H), 0.91 (d, *J* = 7.2 Hz, 12H). <sup>13</sup>C NMR (101 MHz, CDCl<sub>3</sub>) δ 38.7, 30.1, 27.5, 22.3.

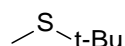

### tert-butyl methyl sulfide (b6) <sup>5</sup>

Yield: 31.3 mg, 26% (84% GC yield); colorless oil; pure hexane; <sup>1</sup>H NMR (400 MHz, CDCl<sub>3</sub>) δ 2.05 (s, 3H), 1.31 (s, 9H). <sup>13</sup>C NMR (101 MHz, CDCl<sub>3</sub>) δ 40.7, 30.2, 11.4.



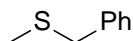

**benzyl methyl sulfide (b7)** <sup>6</sup>

Yield: 55.3 mg, 80%; colorless oil; pure hexane; <sup>1</sup>H NMR (400 MHz, CDCl<sub>3</sub>) δ 7.29 (t, *J* = 3.5 Hz, 4H), 7.25 – 7.21 (m, 1H), 3.66 (s, 2H), 1.98 (s, 3H). <sup>13</sup>C NMR (101 MHz, CDCl<sub>3</sub>) δ 138.3, 128.9, 128.5, 127.0, 38.4, 15.0.

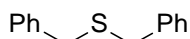

**dibenzyl sulfide (b8)** <sup>1</sup>

Yield: 49.3 mg, 46%; white solid; pure hexane; <sup>1</sup>H NMR (400 MHz, CDCl<sub>3</sub>) δ 7.40 – 7.19 (m, 10H), 3.60 (s, 4H). <sup>13</sup>C NMR (101 MHz, CDCl<sub>3</sub>) δ 138.2, 129.0, 128.5, 127.0, 35.6.

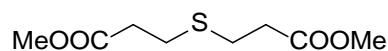

**dimethyl 3,3'-thiodipropionate (b9)** <sup>7</sup>

Yield: 95.9 mg, 92%; colorless oil; hexane/ethyl acetate = 5:1; <sup>1</sup>H NMR (400 MHz, CDCl<sub>3</sub>) δ 3.71 (s, 6H), 2.81 (t, *J* = 6.5 Hz, 4H), 2.63 (t, *J* = 7.7 Hz, 4H). <sup>13</sup>C NMR (101 MHz, CDCl<sub>3</sub>) δ 172.2, 51.8, 34.5, 27.0.

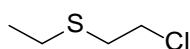

**2-chloroethyl ethyl sulfide (b10)** <sup>8</sup>

Yield: 49.9 mg, 80% (99% GC yield); colorless oil; pure hexane; <sup>1</sup>H NMR (400 MHz, CDCl<sub>3</sub>) δ 3.63 (t, 2H), 2.87 (t, *J* = 8.2 Hz, 2H), 2.60 (q, *J* = 10.4, 9.0 Hz, 2H), 1.28 (t, *J* = 7.6 Hz, 3H). <sup>13</sup>C NMR (101 MHz, CDCl<sub>3</sub>) δ 43.1, 33.8, 26.3, 14.9.

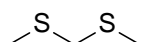

**bis(methylthio)methane (b11)** <sup>1</sup>

Yield: 32.5 mg, 60% (95% GC yield); colorless oil; pure hexane; <sup>1</sup>H NMR (400 MHz, CDCl<sub>3</sub>) δ 3.63 (s, 2H), 2.16 (s, 6H). <sup>13</sup>C NMR (101 MHz, CDCl<sub>3</sub>) δ 40.1, 14.3.

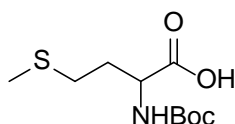

**(tert-butoxycarbonyl)methionine (b12)** <sup>9</sup>

Yield: 93.3 mg, 80%; white solid; hexane/ethyl acetate = 2:1, with 2% AcOH; <sup>1</sup>H NMR (400 MHz, CDCl<sub>3</sub>) δ 4.47 (d, *J* = 6.4 Hz, 1H), 2.60 (t, *J* = 7.5 Hz, 2H), 2.34 – 1.84 (m, 5H), 1.47 (s, 9H). <sup>13</sup>C NMR (101 MHz, DMSO-*d*<sub>6</sub>) δ 174.4, 156.1, 78.5, 52.8, 30.8, 30.3, 28.6, 15.0.

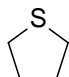

**tetrahydrothiophene (b13)**<sup>1</sup>

Yield: 25.6 mg, 58% (98% GC yield); colorless oil; pure hexane; <sup>1</sup>H NMR (400 MHz, CDCl<sub>3</sub>) δ 2.86 (t, 4H), 2.09 – 1.80 (m, 4H). <sup>13</sup>C NMR (101 MHz, CDCl<sub>3</sub>) δ 31.7, 31.0.

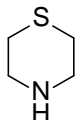

**thiomorpholine (b14)**<sup>10</sup>

Yield: 43.9 mg, 85%; colorless oil; hexane/ethyl acetate = 10:1, with 5% Et<sub>3</sub>N; <sup>1</sup>H NMR (400 MHz, CDCl<sub>3</sub>) δ 3.11 (q, *J* = 3.6, 2.9 Hz, 4H), 2.60 (t, *J* = 4.6 Hz, 4H), 1.87 (s, 1H). <sup>13</sup>C NMR (101 MHz, CDCl<sub>3</sub>) δ 47.8, 28.2.

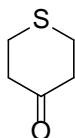

**tetrahydro-4H-thiopyran-4-one (b15)**<sup>11</sup>

Yield: 54.0 mg, 93%; colorless oil; hexane/ethyl acetate = 10:1; <sup>1</sup>H NMR (400 MHz, CDCl<sub>3</sub>) δ 2.96 (t, *J* = 6.0 Hz, 1H), 2.69 (t, *J* = 4.8 Hz, 1H). <sup>13</sup>C NMR (101 MHz, CDCl<sub>3</sub>) δ 208.3, 44.0, 30.0.

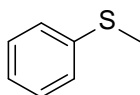

**methyl phenyl sulfide (16)**<sup>1</sup>

Yield: 55.9 mg, 90%; colorless oil; pure hexane; <sup>1</sup>H NMR (400 MHz, CDCl<sub>3</sub>) δ 7.37 – 7.27 (m, 4H), 7.18 (t, *J* = 6.5 Hz, 1H), 2.52 (s, 3H). <sup>13</sup>C NMR (101 MHz, CDCl<sub>3</sub>) δ 138.4, 128.8, 126.7, 125.0, 15.9.

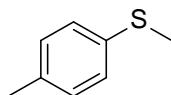

**methyl p-tolyl sulfide (17)**<sup>1</sup>

Yield: 61.5 mg, 89%; colorless oil; pure hexane; <sup>1</sup>H NMR (400 MHz, CDCl<sub>3</sub>) δ 7.17 (d, *J* = 8.3 Hz, 2H), 7.09 (d, *J* = 8.5 Hz, 2H), 2.45 (s, 3H), 2.30 (s, 3H). <sup>13</sup>C NMR (101 MHz, CDCl<sub>3</sub>) δ 135.1, 134.8, 129.7, 127.3, 21.0, 16.5.

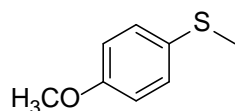

**4-methoxyphenyl methyl sulfide (b18)**<sup>1</sup>

Yield: 64.0 mg, 83%; colorless oil; hexane/ethyl acetate = 10:1; <sup>1</sup>H NMR (400 MHz, CDCl<sub>3</sub>) δ 7.30 (d, *J* = 8.8 Hz, 2H), 6.88 (d, *J* = 8.7 Hz, 2H), 3.81 (s, 3H), 2.47 (s, 3H). <sup>13</sup>C NMR (101 MHz, CDCl<sub>3</sub>) δ 158.1, 130.1, 128.7, 114.6, 55.3, 18.0.

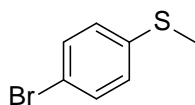

**4-bromophenyl methyl sulfide (b19)**<sup>1</sup>

Yield: 86.3 mg, 85%; white solid; pure hexane; <sup>1</sup>H NMR (400 MHz, CDCl<sub>3</sub>) δ 7.36 (d, *J* = 8.6 Hz, 2H), 7.08 (d, *J* = 8.5 Hz, 2H), 2.43 (s, 3H). <sup>13</sup>C NMR (101 MHz, CDCl<sub>3</sub>) δ 137.8, 131.8, 128.1, 118.6, 15.9.

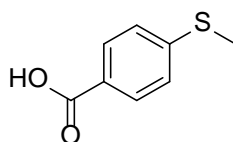

**4-(methylthio)benzoic acid (b20)**<sup>12</sup>

Yield: 73.2 mg, 87%; white solid, hexane/ethyl acetate = 5:1, with 5% AcOH; <sup>1</sup>H NMR (400 MHz, DMSO-*d*<sub>6</sub>) δ 12.88 (s, 1H), 7.87 (dd, *J* = 8.3, 2.1 Hz, 2H), 7.35 (d, *J* = 8.0 Hz, 2H), 2.53 (s, 3H). <sup>13</sup>C NMR (101 MHz, DMSO-*d*<sub>6</sub>) δ 167.5, 145.3, 130.2, 127.1, 125.3, 14.4.

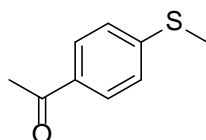

**1-(4-(methylthio)phenyl)ethan-1-one (b21)**<sup>1</sup>

Yield: 75.6 mg, 91%; white solid; hexane/ethyl acetate = 10:1; <sup>1</sup>H NMR (400 MHz, CDCl<sub>3</sub>) δ 7.88 (d, *J* = 8.5 Hz, 2H), 7.28 (d, *J* = 8.5 Hz, 2H), 2.58 (s, 3H), 2.54 (s, 3H). <sup>13</sup>C NMR (101 MHz, CDCl<sub>3</sub>) δ 197.1, 145.8, 133.4, 128.7, 124.9, 26.4, 14.7

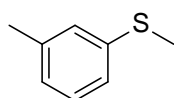

**methyl(m-tolyl)sulfane (b22)**<sup>19</sup>

Yield: 59.4 mg, 86%; colorless oil; pure hexane; <sup>1</sup>H NMR (400 MHz, CDCl<sub>3</sub>) δ 7.21 (t, *J* = 7.6 Hz, 1H), 7.15 – 7.07 (m, 2H), 6.99 (d, *J* = 7.5 Hz, 1H), 2.51 (s, 3H), 2.37 (s, 3H). <sup>13</sup>C NMR (101 MHz, CDCl<sub>3</sub>) δ 138.6, 138.2, 128.7, 127.4, 126.0, 123.7, 21.4, 15.9.

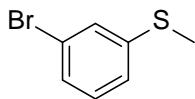

**(3-bromophenyl)(methyl)sulfane (b23)** <sup>19</sup>

Yield: 83.3 mg, 82%; colorless oil; pure hexane; <sup>1</sup>H NMR (400 MHz, CDCl<sub>3</sub>) δ 7.39 (t, *J* = 2.0 Hz, 1H), 7.28 (m, 1H), 7.22 – 7.11 (m, 2H), 2.50 (s, 3H). <sup>13</sup>C NMR (101 MHz, CDCl<sub>3</sub>) δ 141.0, 130.1, 128.8, 128.0, 125.0, 122.9, 15.7.

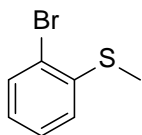

**2-bromophenyl methyl sulfide (b24)** <sup>1</sup>

Yield: 77.2 mg, 76%; colorless oil; pure hexane; <sup>1</sup>H NMR (400 MHz, CDCl<sub>3</sub>) δ 7.55 (dd, *J* = 7.9, 1.4 Hz, 1H), 7.32 (td, *J* = 7.6, 1.3 Hz, 1H), 7.16 (dd, *J* = 8.0, 1.5 Hz, 1H), 7.03 (td, *J* = 7.6, 1.5 Hz, 1H), 2.50 (s, 3H). <sup>13</sup>C NMR (101 MHz, CDCl<sub>3</sub>) δ 139.6, 132.6, 127.7, 125.6, 125.4, 121.7, 15.7.

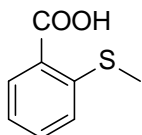

**2-(methylthio)benzoic acid (b25)** <sup>2</sup>

Yield: 58.9 mg, 70%; white solid; hexane/ethyl acetate = 5:1, with 5% AcOH; <sup>1</sup>H NMR (400 MHz, DMSO-*d*<sub>6</sub>) δ 13.01 (s, 1H), 7.91 (d, *J* = 7.8 Hz, 1H), 7.55 (t, *J* = 7.7 Hz, 1H), 7.36 (d, *J* = 8.1 Hz, 1H), 7.21 (t, *J* = 7.5 Hz, 1H), 2.40 (s, 3H). <sup>13</sup>C NMR (101 MHz, DMSO-*d*<sub>6</sub>) δ 167.9, 143.0, 133.0, 131.4, 127.7, 125.0, 123.9, 15.2.

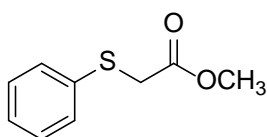

**methyl 2-(phenylthio)acetate (b26)** <sup>2</sup>

Yield: 72.0 mg, 79%; colorless oil; hexane/ethyl acetate = 10:1; <sup>1</sup>H NMR (400 MHz, CDCl<sub>3</sub>) δ 7.43 (d, *J* = 7.7 Hz, 2H), 7.33 (t, *J* = 7.5 Hz, 2H), 7.31 – 7.21 (m, 1H), 3.74 (s, 3H), 3.68 (s, 2H). <sup>13</sup>C NMR (101 MHz, CDCl<sub>3</sub>) δ 170.1, 134.9, 129.9, 129.0, 127.0, 52.5, 36.5.

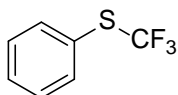

**phenyl trifluoromethyl sulfide (b27)** <sup>12</sup>

Yield: 24.9 mg, 28%; colorless oil; pure hexane; <sup>1</sup>H NMR (400 MHz, CDCl<sub>3</sub>) δ 7.66 (d, *J* = 7.6 Hz, 2H), 7.50 (t, *J* = 7.1 Hz, 1H), 7.42 (t, *J* = 7.5 Hz, 2H). <sup>13</sup>C NMR (101 MHz, CDCl<sub>3</sub>) δ 136.4, 130.8, 129.7 (q, *J* = 306.6 Hz), 129.5, 124.4. <sup>19</sup>F NMR (377 MHz, CDCl<sub>3</sub>) δ -42.76.

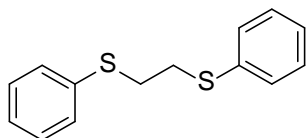

**1,2-bis(phenylthio)ethane (b28)** <sup>14</sup>

Yield: 114.6 mg, 93%; white solid; pure hexane; <sup>1</sup>H NMR (400 MHz, CDCl<sub>3</sub>) δ 7.36 – 7.28 (m, 8H), 7.27 – 7.22 (m, 2H), 3.12 (s, 4H). <sup>13</sup>C NMR (101 MHz, CDCl<sub>3</sub>) δ 135.0, 130.0, 129.0, 126.5, 33.3.

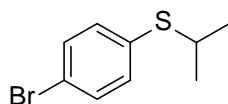

**4-bromophenyl isopropyl sulfide (b29)** <sup>13</sup>

Yield: 92.4 mg, 80%; colorless oil; pure hexane; <sup>1</sup>H NMR (400 MHz, CDCl<sub>3</sub>) δ 7.47 – 7.39 (m, 2H), 7.27 (d, *J* = 8.2 Hz, 2H), 3.37 (hept, *J* = 6.6 Hz, 1H), 1.31 (d, *J* = 6.7 Hz, 6H). <sup>13</sup>C NMR (101 MHz, CDCl<sub>3</sub>) δ 133.3, 131.8, 38.3, 23.0.

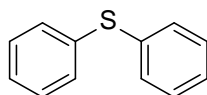

**diphenyl sulfide (b30)** <sup>1</sup>

Yield: 76.4 mg, 82%; colorless oil; pure hexane; <sup>1</sup>H NMR (400 MHz, CDCl<sub>3</sub>) δ 7.37 – 7.21 (m, 10H). <sup>13</sup>C NMR (101 MHz, CDCl<sub>3</sub>) δ 135.8, 131.1, 129.2, 127.1.

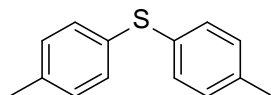

**di-p-tolyl sulfide (b31)** <sup>1</sup>

Yield: 80.4 mg, 75%; white solid; pure hexane; <sup>1</sup>H NMR (400 MHz, CDCl<sub>3</sub>) δ 7.30 – 7.25 (m, 4H), 7.14 (d, *J* = 8.0 Hz, 4H), 2.37 (s, 6H). <sup>13</sup>C NMR (101 MHz, CDCl<sub>3</sub>) δ 136.9, 132.7, 131.1, 129.9, 21.1.

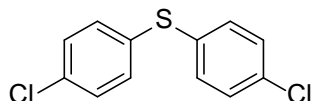

**bis(4-chlorophenyl) sulfide (b32)** <sup>1</sup>

Yield: 111.0 mg, 87%; white solid; pure hexane; <sup>1</sup>H NMR (400 MHz, CDCl<sub>3</sub>) δ 7.38 – 7.20 (m, 8H). <sup>13</sup>C NMR (101 MHz, CDCl<sub>3</sub>) δ 133.9, 133.4, 132.3, 129.4.

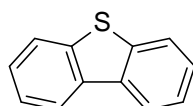

**dibenzo[b,d]thiophene (b33)** <sup>15</sup>

Yield: 82.0 mg, 89%; white solid; pure hexane; <sup>1</sup>H NMR (400 MHz, CDCl<sub>3</sub>) δ 8.19 (dt, *J* = 7.3, 3.6 Hz, 2H), 7.89 (dt, *J* = 7.2, 3.6 Hz, 2H), 7.55 – 7.44 (m, 4H). <sup>13</sup>C NMR (101 MHz, CDCl<sub>3</sub>) δ 139.4, 135.5, 126.7, 124.3, 122.8, 121.5.

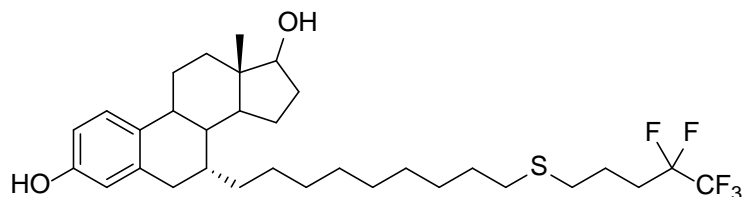

#### fulvestran sulfide <sup>16</sup>

Yield: 162.5 mg, 55%; white solid; hexane/ethyl acetate = 3:1; <sup>1</sup>H NMR (600 MHz, CDCl<sub>3</sub>) δ 7.17 (d, *J* = 8.4 Hz, 1H), 6.65 (dd, *J* = 8.4, 2.7 Hz, 1H), 6.57 (d, *J* = 2.7 Hz, 1H), 3.78 (t, *J* = 8.5 Hz, 1H), 2.88 (dd, *J* = 16.9, 5.5 Hz, 1H), 2.73 (d, *J* = 16.8 Hz, 1H), 2.61 (t, *J* = 7.0 Hz, 2H), 2.52 (t, *J* = 7.4 Hz, 2H), 2.42 – 2.27 (m, 2H), 2.26 – 2.10 (m, 3H), 1.91 (m, 3H), 1.76 (m, 1H), 1.69 – 1.55 (m, 4H), 1.53 – 1.42 (m, 2H), 1.38 (m, 4H), 1.35 – 1.25 (m, 10H), 1.23 – 1.15 (m, 2H), 1.05 (m, 1H), 0.80 (s, 3H). <sup>13</sup>C NMR (101 MHz, CDCl<sub>3</sub>) δ 153.7, 137.1, 131.7, 127.0, 118.9 (qt, *J*<sub>CF<sup>1</sup></sub> = 285.0 Hz, *J*<sub>CF<sup>2</sup></sub> = 36.1 Hz) 116.2, 115.6 (qt, *J*<sub>CF<sup>1</sup></sub> = 251.8 Hz, *J*<sub>CF<sup>2</sup></sub> = 37.6 Hz) 112.9, 82.1, 46.5, 43.4, 42.0, 38.1, 36.9, 34.6, 33.2, 32.0, 31.3, 30.5, 30.0, 29.7, 29.6 (t, *J*<sub>CF</sub> = 22 Hz), 29.5, 29.2, 28.9, 28.2, 27.3, 25.6, 22.7, 20.4, 11.1. <sup>19</sup>F NMR (377 MHz, CDCl<sub>3</sub>) δ -85.40, -117.90

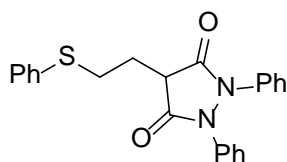

#### sulfinpyrazone sulfide <sup>17</sup>

Yield: 288.4 mg, 75%; white solid; hexane/ethyl acetate = 1:5; <sup>1</sup>H NMR (400 MHz, CDCl<sub>3</sub>) δ 7.29 (q, *J* = 9.1 Hz, 12H), 7.16 (q, *J* = 7.8 Hz, 3H), 3.66 – 3.57 (m, 1H), 3.20 (t, *J* = 8.5 Hz, 2H), 2.35 (q, *J* = 7.5 Hz, 2H). <sup>13</sup>C NMR (101 MHz, CDCl<sub>3</sub>) δ 169.7, 135.8, 134.8, 129.9, 129.1, 129.0, 126.9, 126.6, 122.7, 44.5, 30.4, 27.1.

### 8. References

1. H. Ishikawa, S. Yamaguchi, A. Nakata, K. Nakajima, S. Yamazoe, J. Yamasaki, T. Mizugaki and T. Mitsudome, *JACS Au*, 2022, **2**, 419-427.
2. A. K. Clarke, A. Parkin, R. J. K. Taylor, W. P. Unsworth and J. A. Rossi-Ashton, *ACS Catal.*, 2020, **10**, 5814-5820.
3. A. S. Touchy, S. M. A. Hakim Siddiki, W. Onodera, K. Kon and K.-i. Shimizu, *Green Chem.*, 2016, **18**, 2554–2560.
4. M. Zaidlewicz, J. V. B. Kanth and H. C. Brown, *J. Org. Chem.*, 2000, **65**, 6697-6702.
5. S. Enthaler, *Catal. Sci. Technol.*, 2011, **1**, 104-110.
6. F. Ding, Y. Jiang, S. Gan, R. L.-Y. Bao, K. Lin and L. Shi, *Eur. J. Org. Chem.*, 2017, **2017**, 3427-3430.
7. Y. Sasano, N. Kogure, S. Nagasawa, K. Kasabata and Y. Iwabuchi, *Org. Lett.*, 2018, **20**, 6104-6107.
8. N. V. Russavskaya, N. A. Korchevin, O. V. Alekminskaya, E. N. Sukhomazova, E. P. Levanova and E. N. Deryagina, *Russ. J. Org. Chem.*, 2002, **38**, 1445-1448.
9. F. Scharinger, Á. M. Pálvölgyi, M. Weisz, M. Weil, C. Stanetty, M. Schnürch and K. Bica-Schröder, *Angew. Chem. Int. Ed.*, 2022, **61**, e202202189.
10. M. Yar, E. M. McGarrigle and V. K. Aggarwal, *Angew. Chem. Int. Ed.*, 2008, **47**, 3784-3786.

11. T. Mitsudome, Y. Takahashi, T. Mizugaki, K. Jitsukawa and K. Kaneda, *Angew. Chem. Int. Ed.*, 2014, **53**, 8348-8351.
12. N. Sakai, R. Shimada and Y. Ogiwara, *Asian J. Org. Chem.*, 2021, **10**, 845-850.
13. J. Yan, J.-f. Poon, V. P. Singh, P. Gates and L. Engman, *Org. Lett.*, 2015, **17**, 6162-6165.
14. Y. Fang, T. Rogge, L. Ackermann, S.-Y. Wang and S.-J. Ji, *Nat. Commun.*, 2018, **9**, 2240.
15. Z. Kong, C. Pan, M. Li, L. Wen and W. Guo, *Green Chem.*, 2021, **23**, 2773-2777.
16. D. Caprioglio and S. P. Fletcher, *Chem. Commun.*, 2015, **51**, 14866-14868.
17. S. Scheibye, A. A. El-Barbary, S. O. Lawesson, H. Fritz and G. Rihs, *Tetrahedron*, 1982, **38**, 3753-3760.
18. K. J. Liu, Z. Wang, L. H. Lu, J. Y. Chen, F. Zeng, Y. W. Lin, Z. Cao, X. Yu and W. M. He, *Green Chem.*, 2021, **23**, 496-500.
19. X. M. Wu, J. M. Lou and G. B. Yan, *Synlett*, 2016, **27**, 2269-2273.

## 9. Copies of NMR spectra

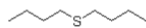

**b1**

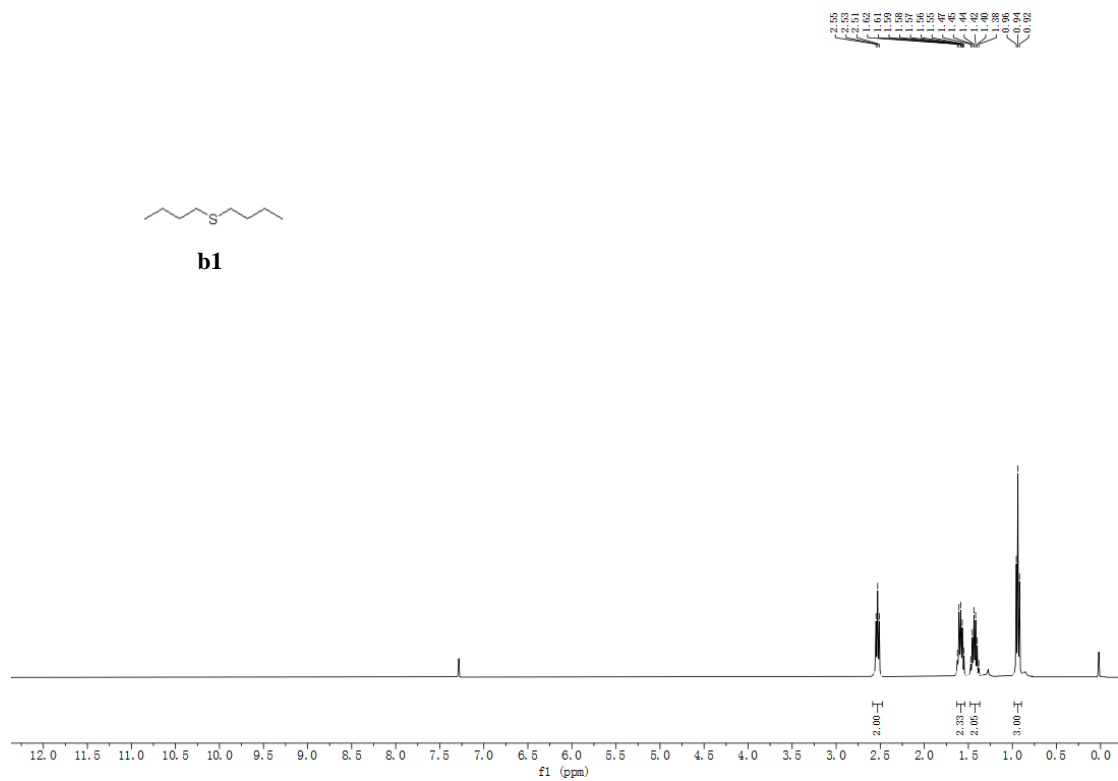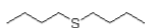

**b1**

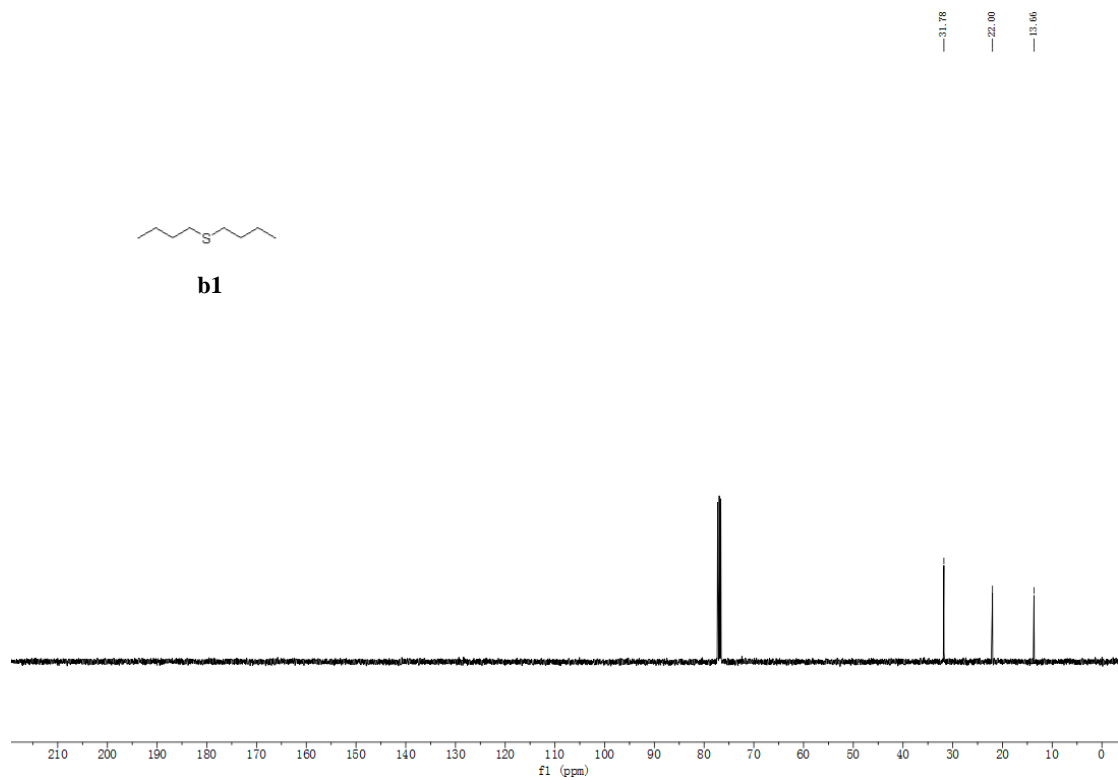



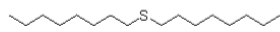

**b2**

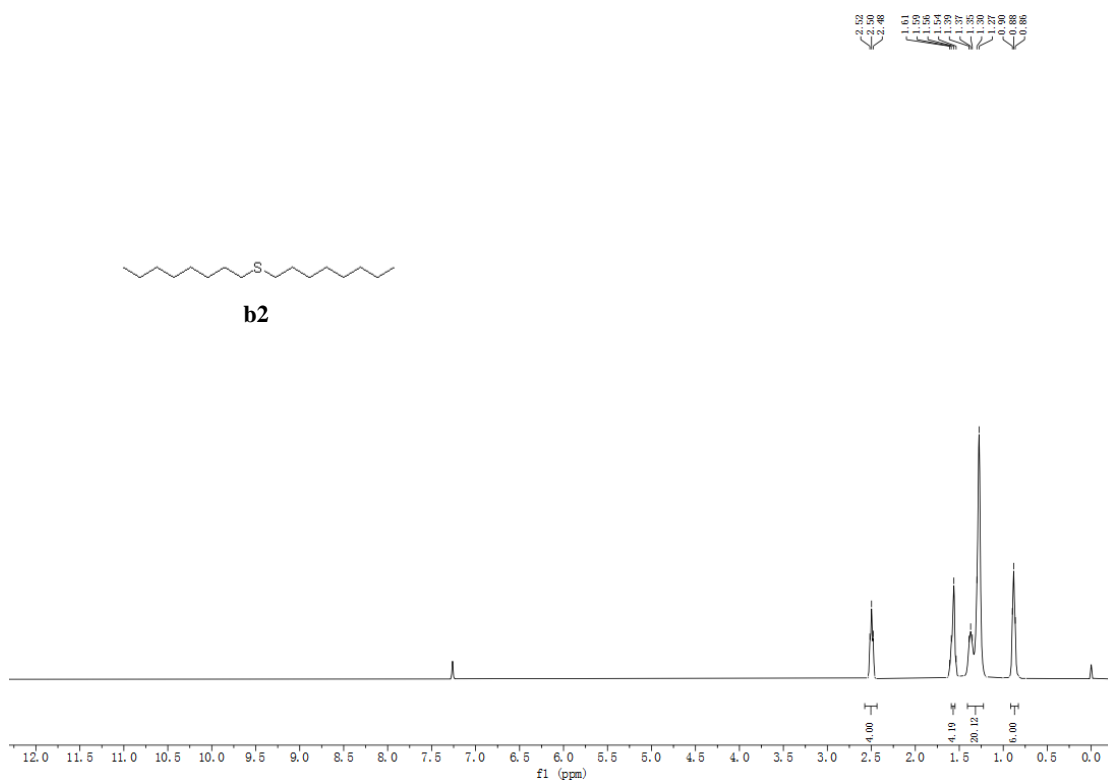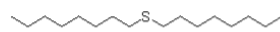

**b2**

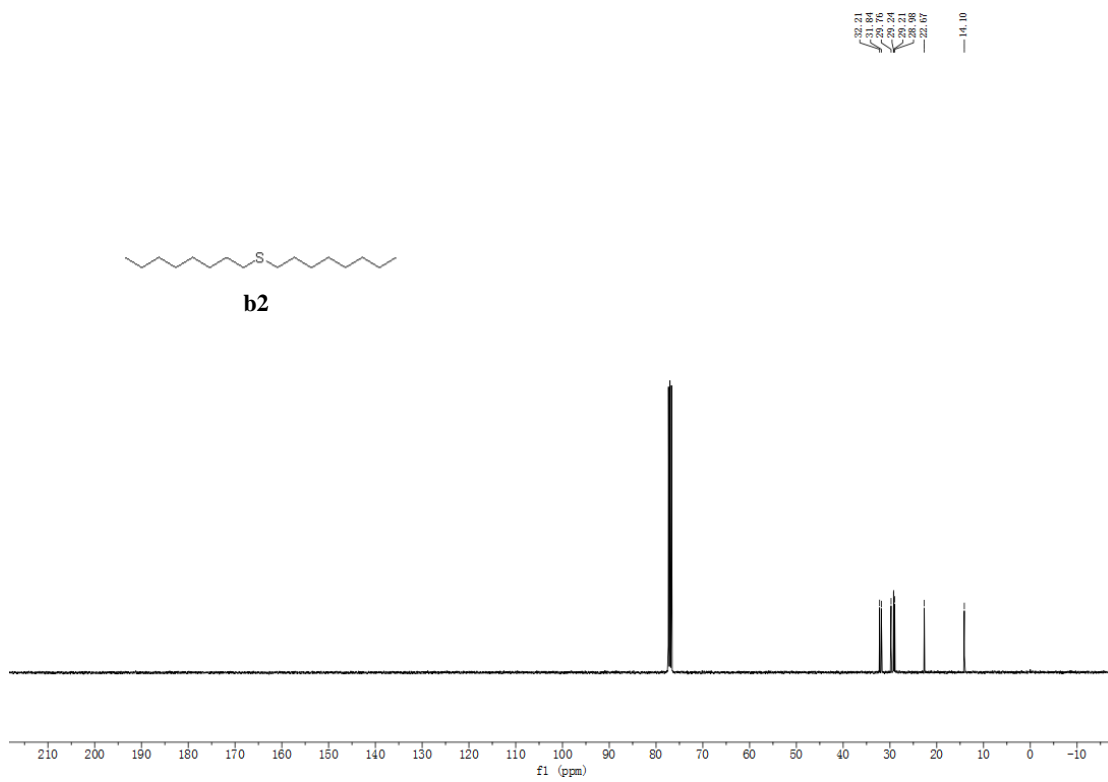

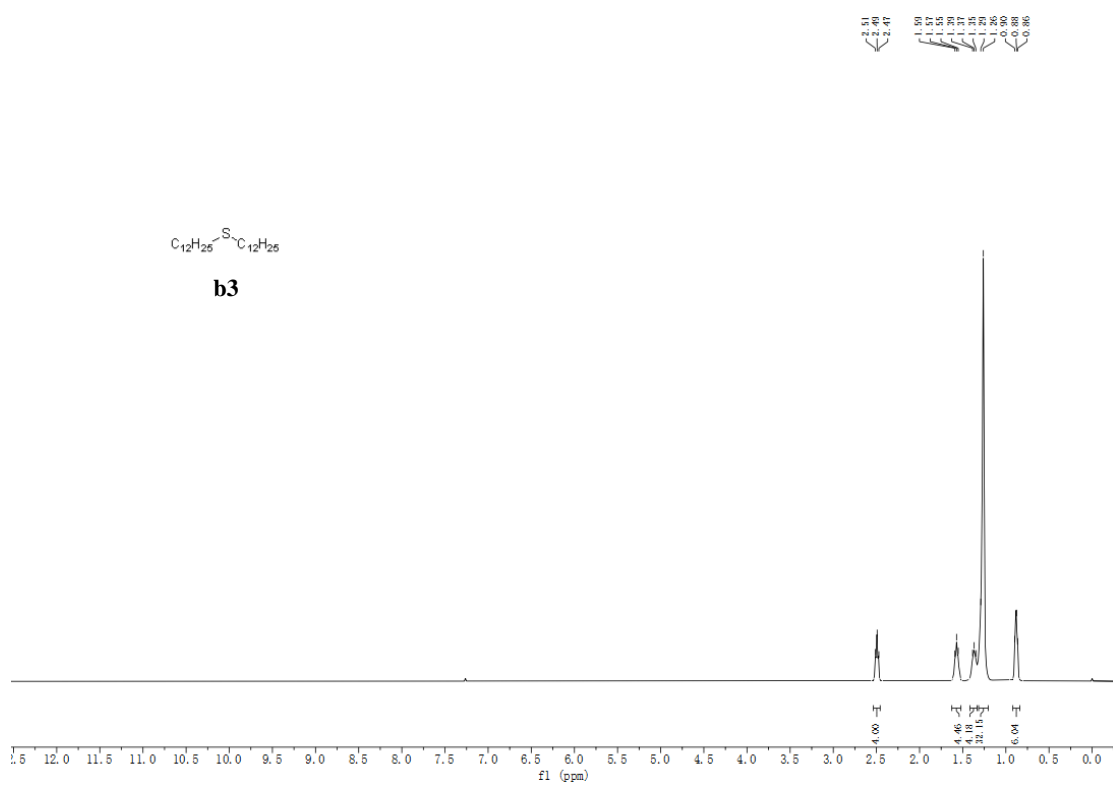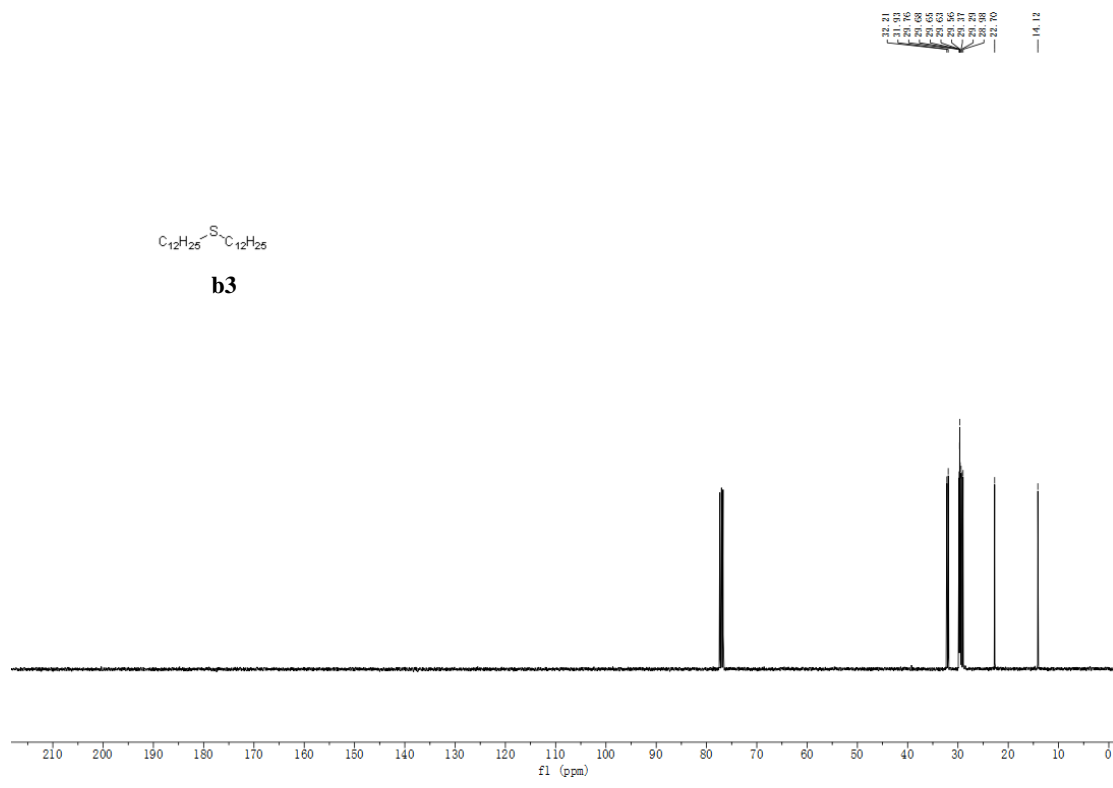

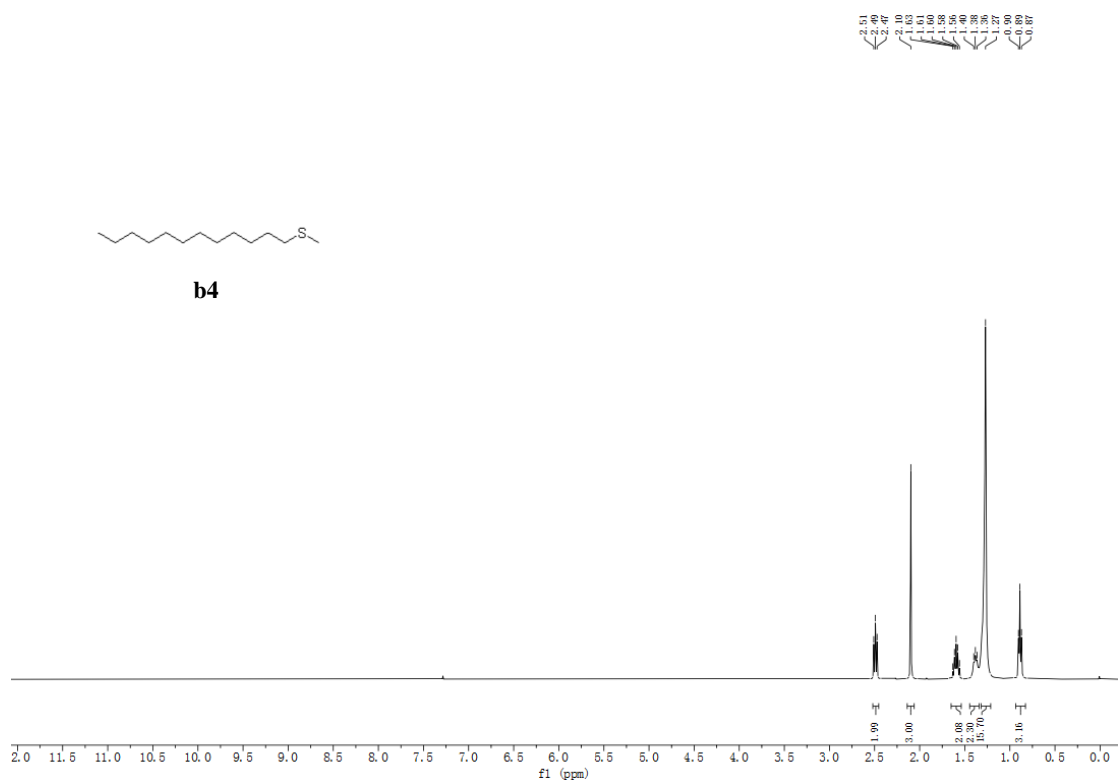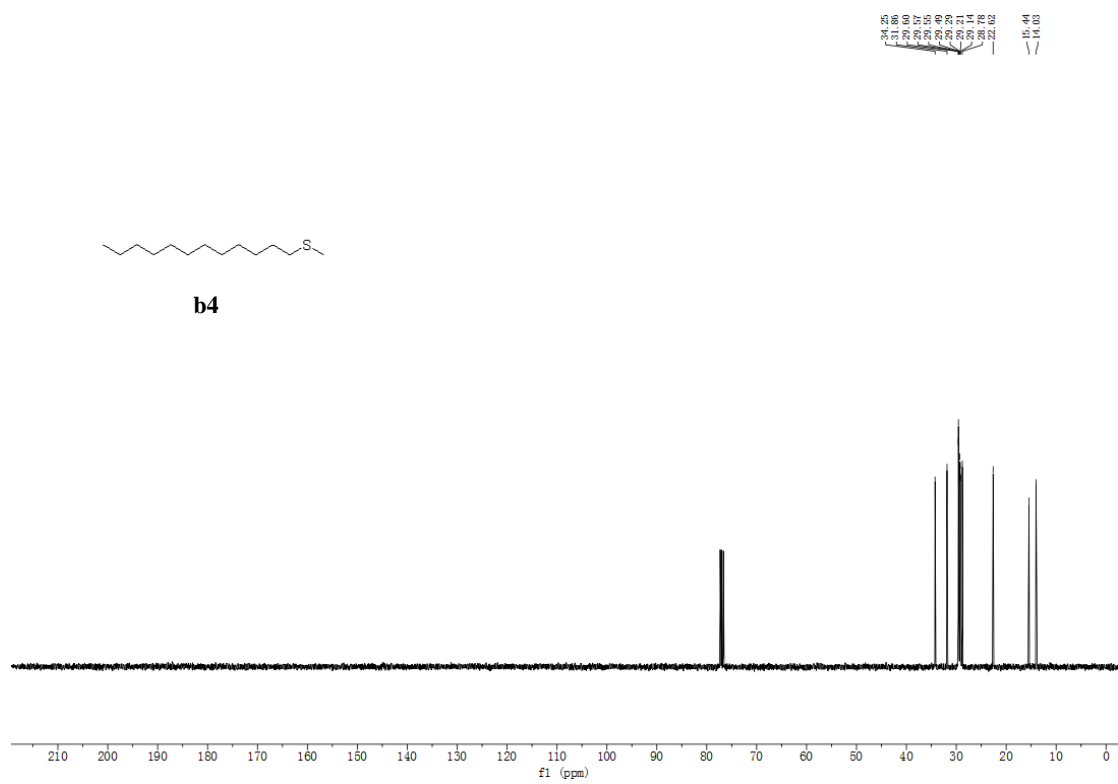

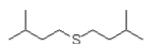

**b5**

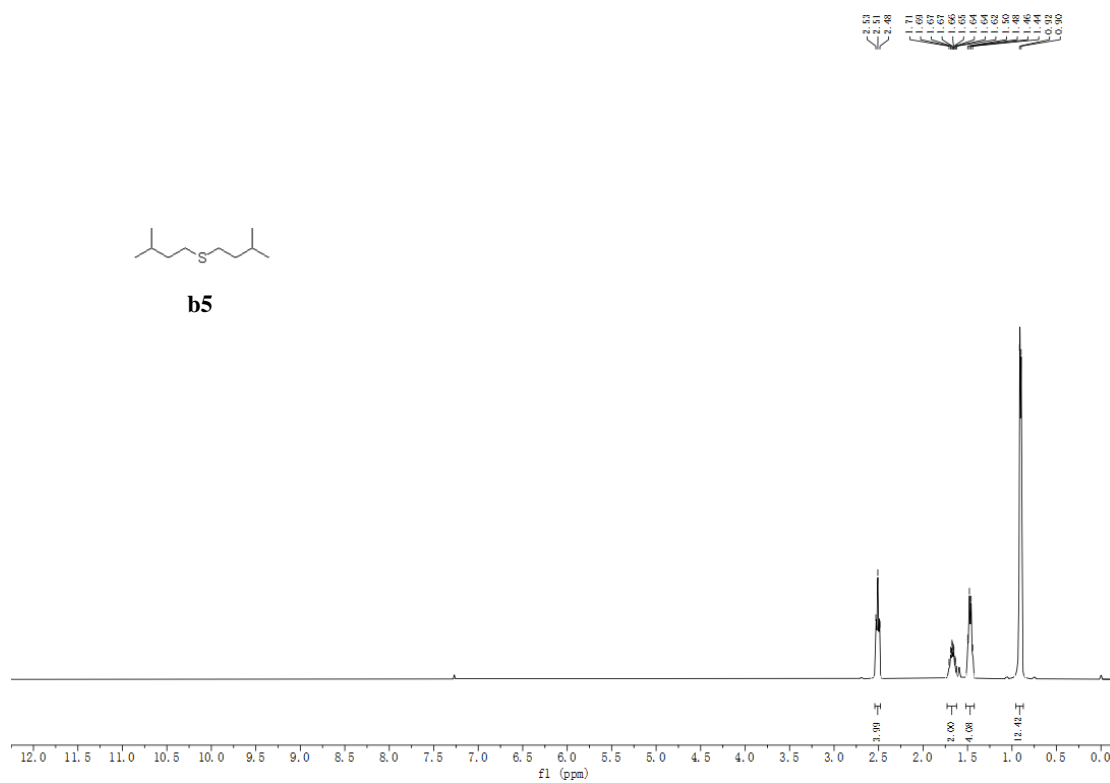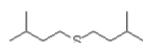

**b5**

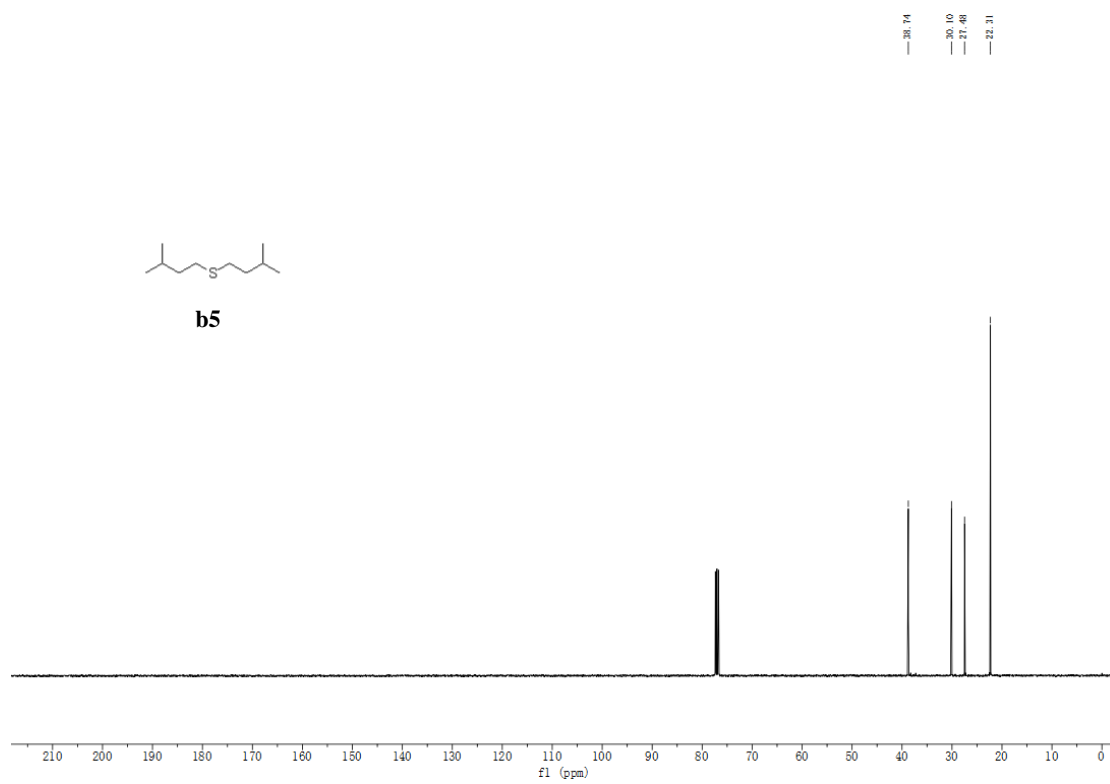

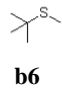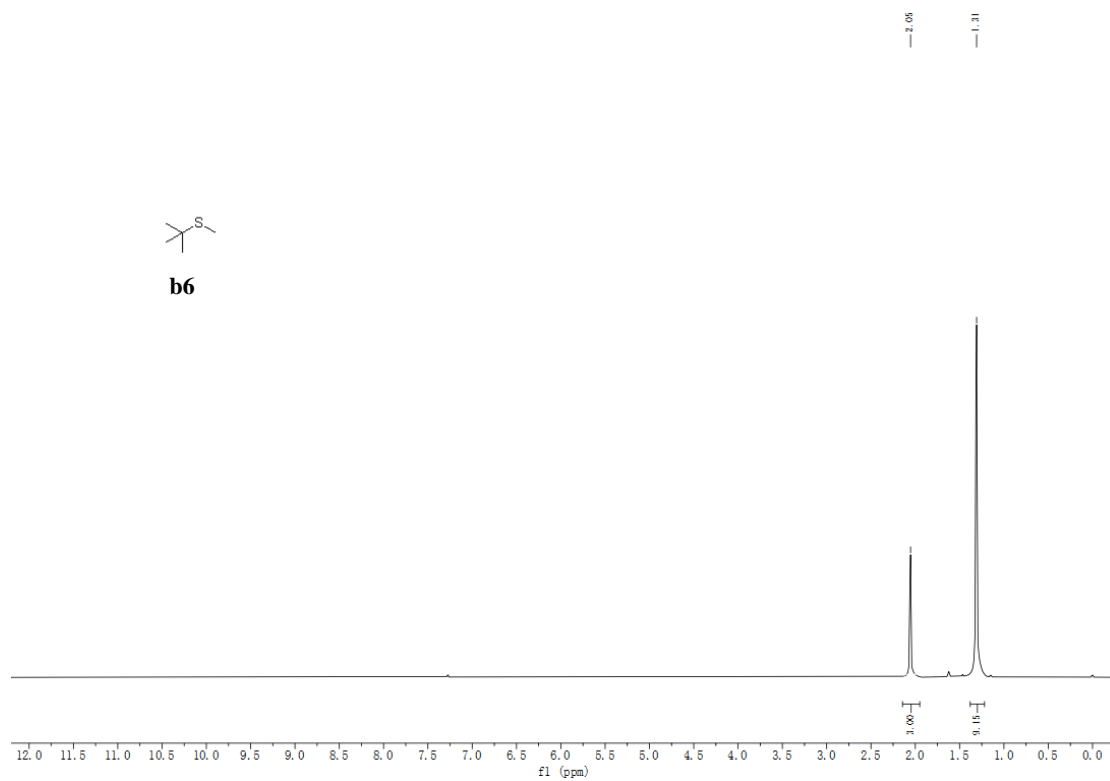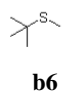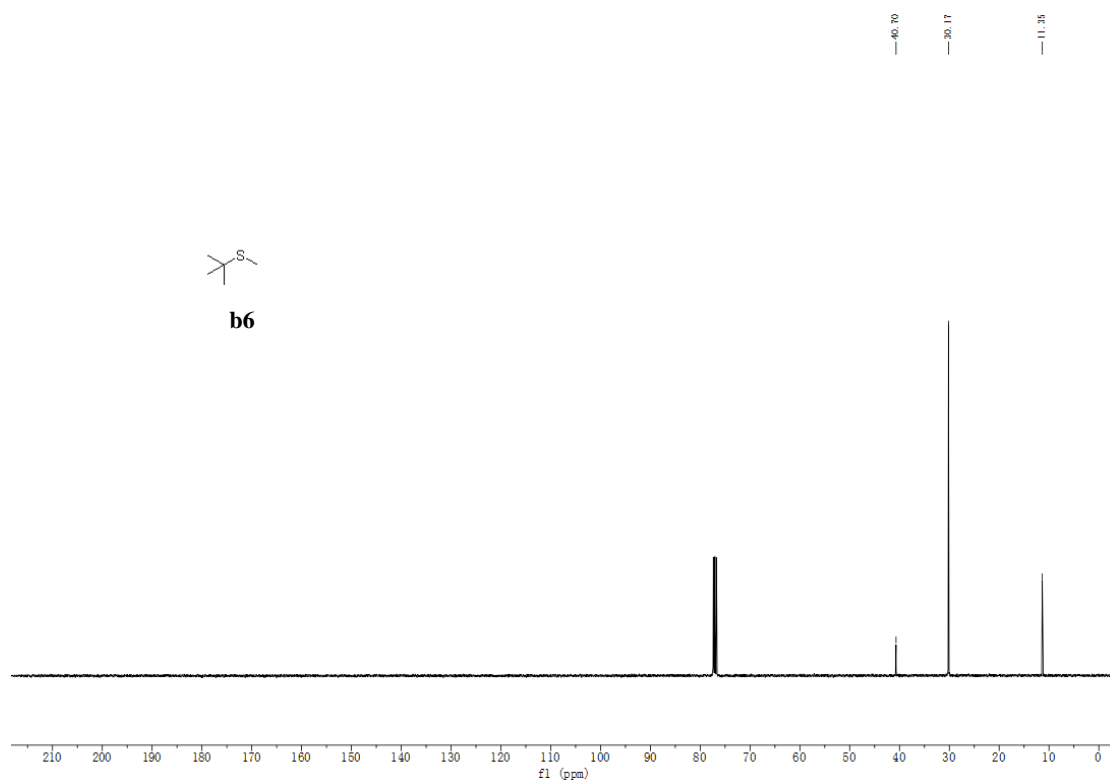



7.35  
7.33  
7.31  
7.29  
7.27  
7.24

3.00

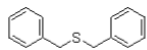

**b8**

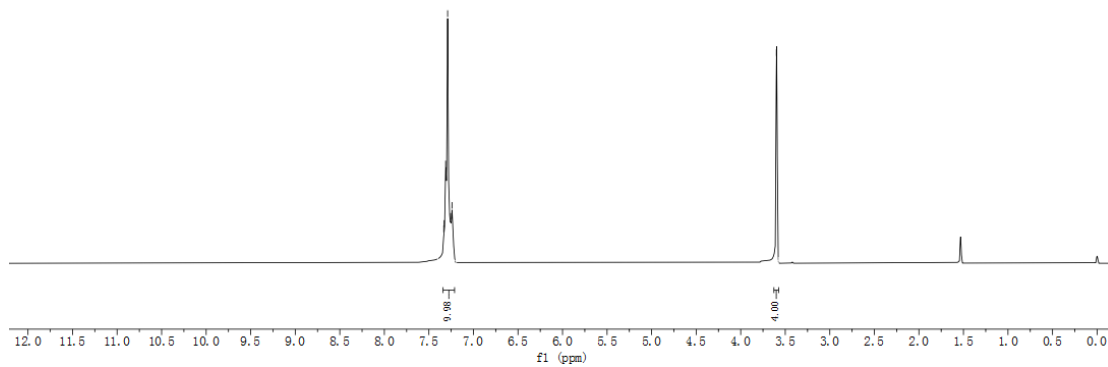

138.17  
129.03  
128.50  
127.00

35.62

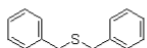

**b8**

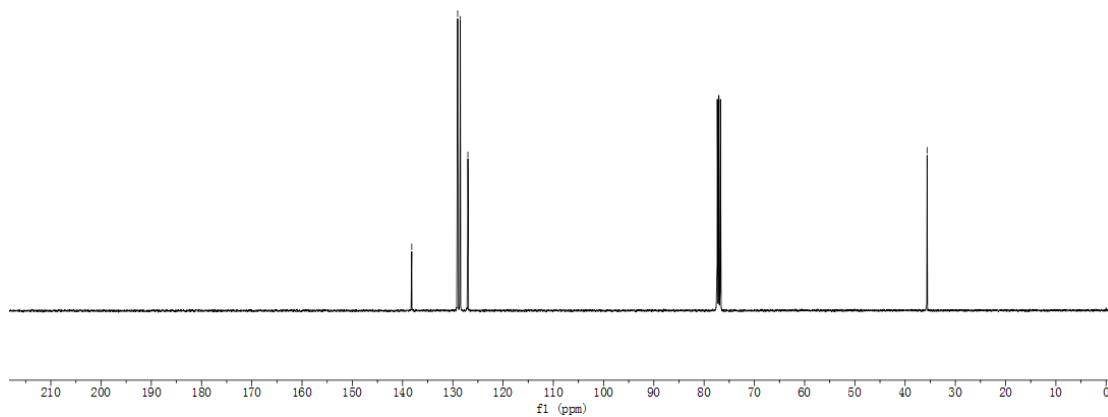

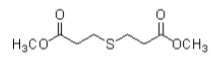

**b9**

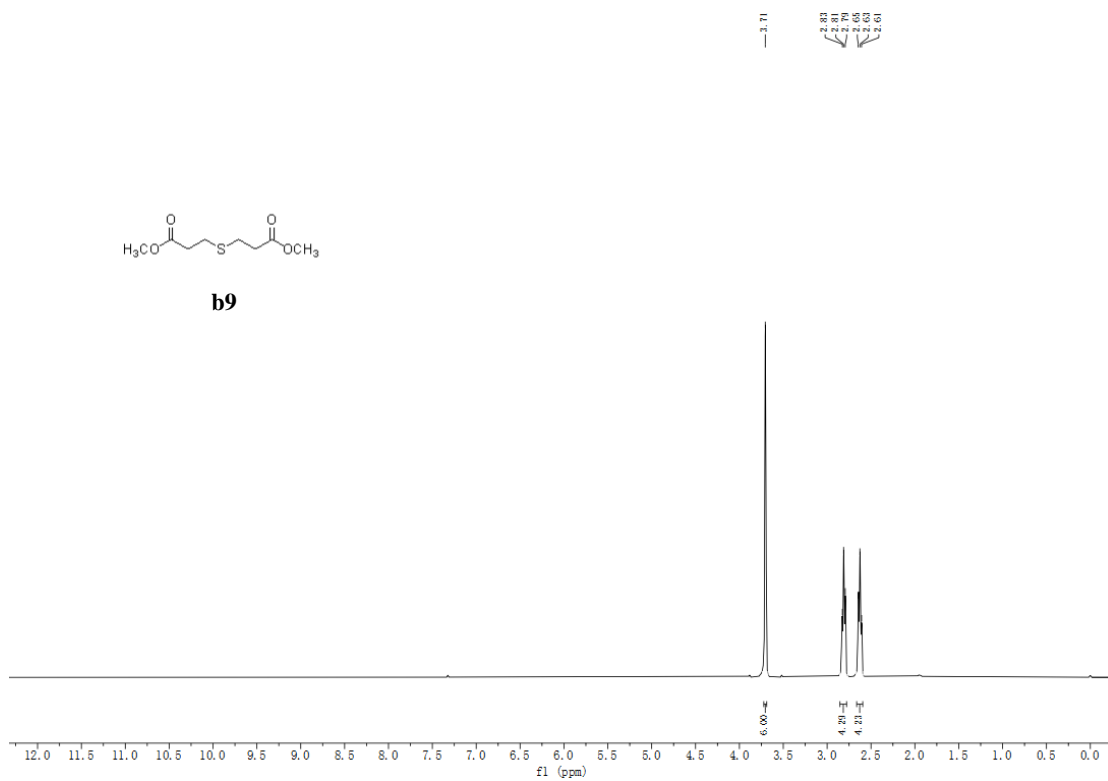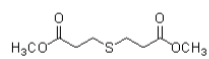

**b9**

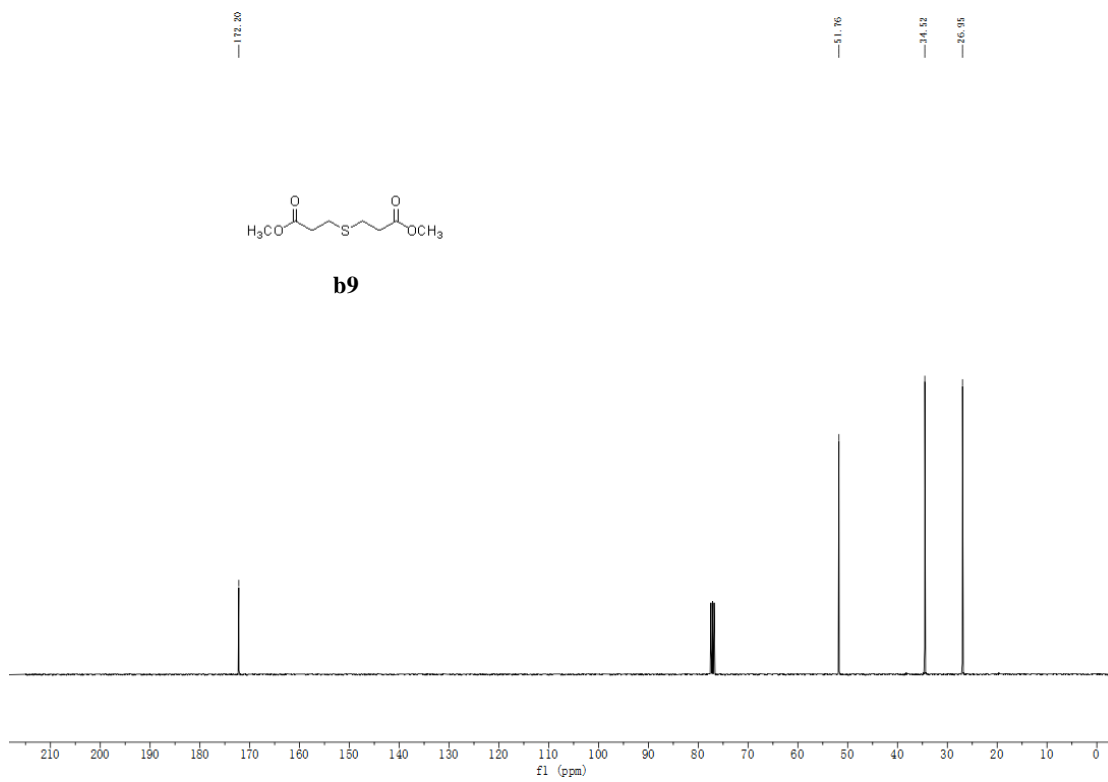



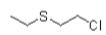

**b10**

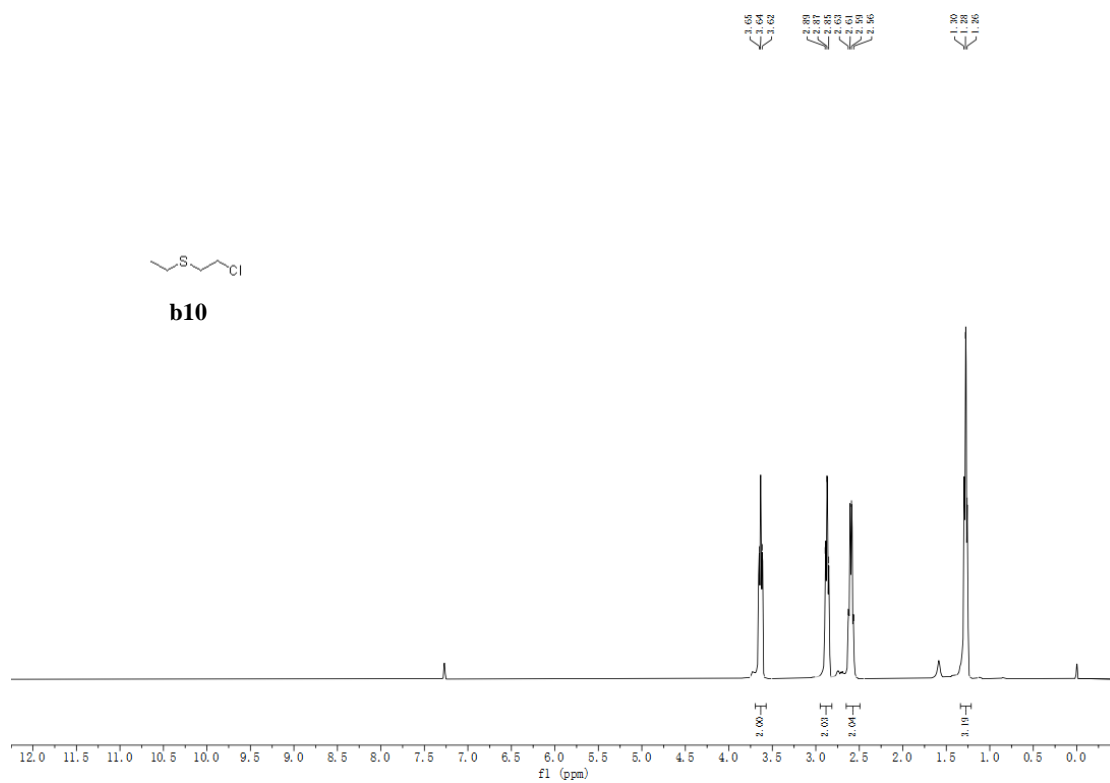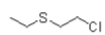

**b10**

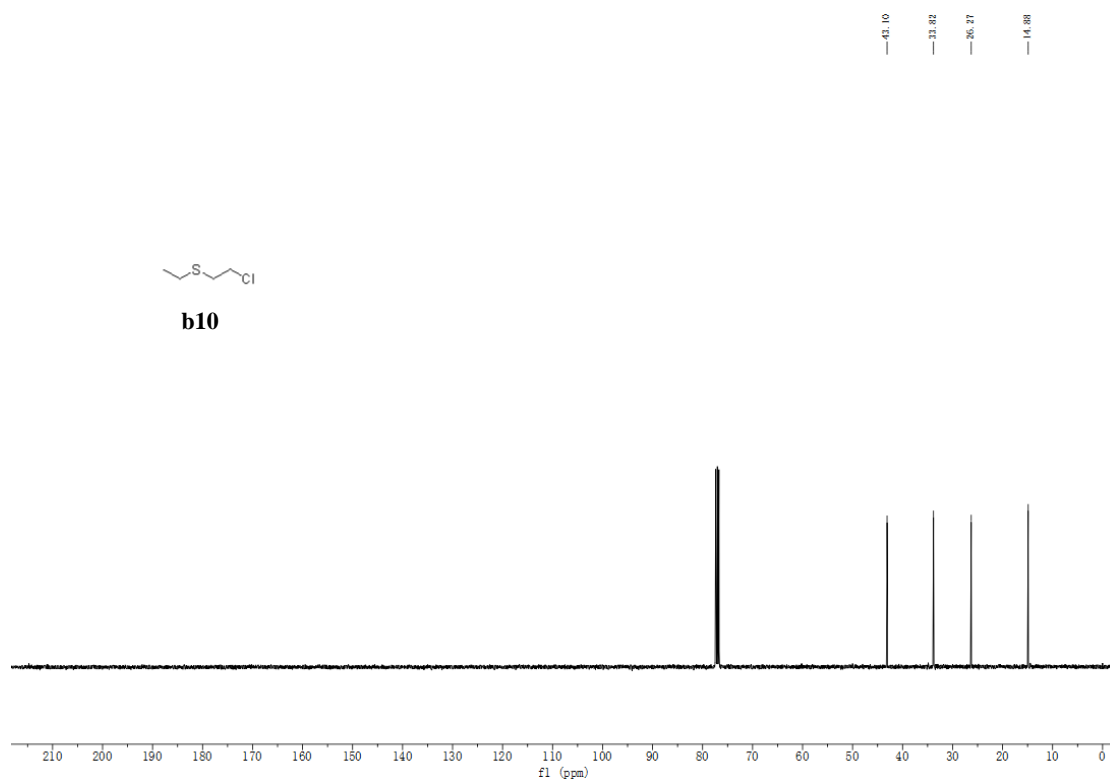

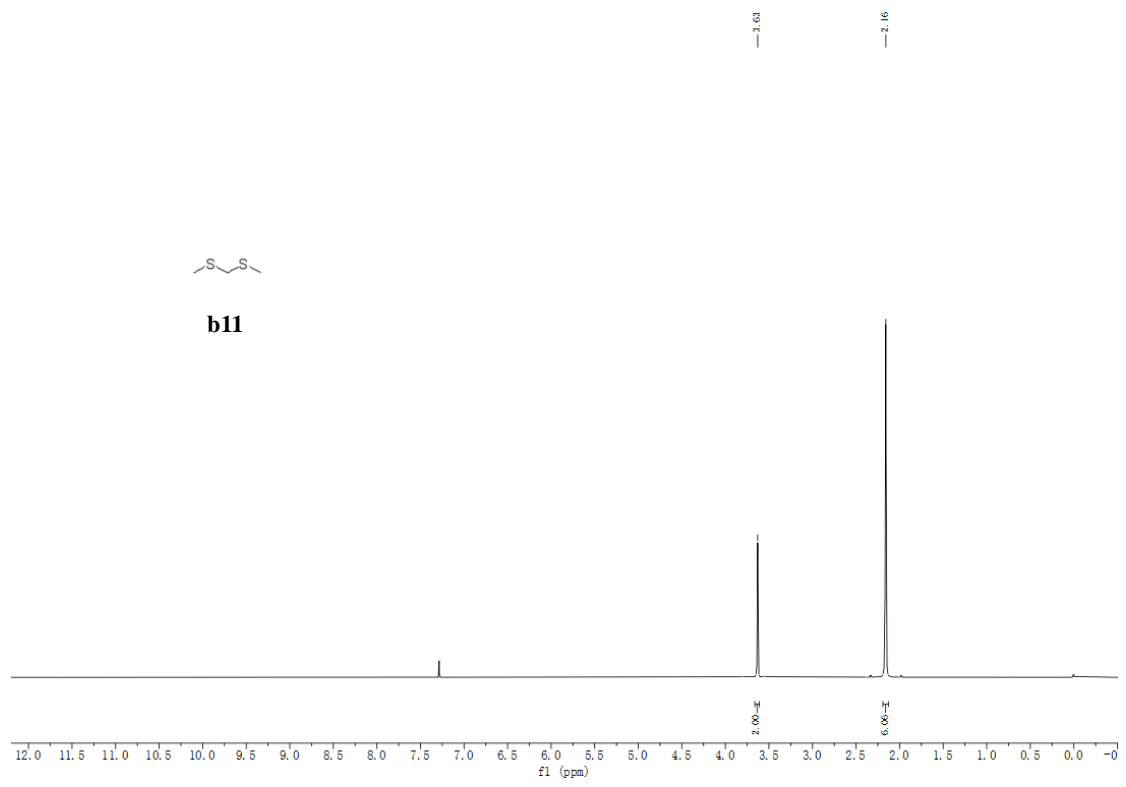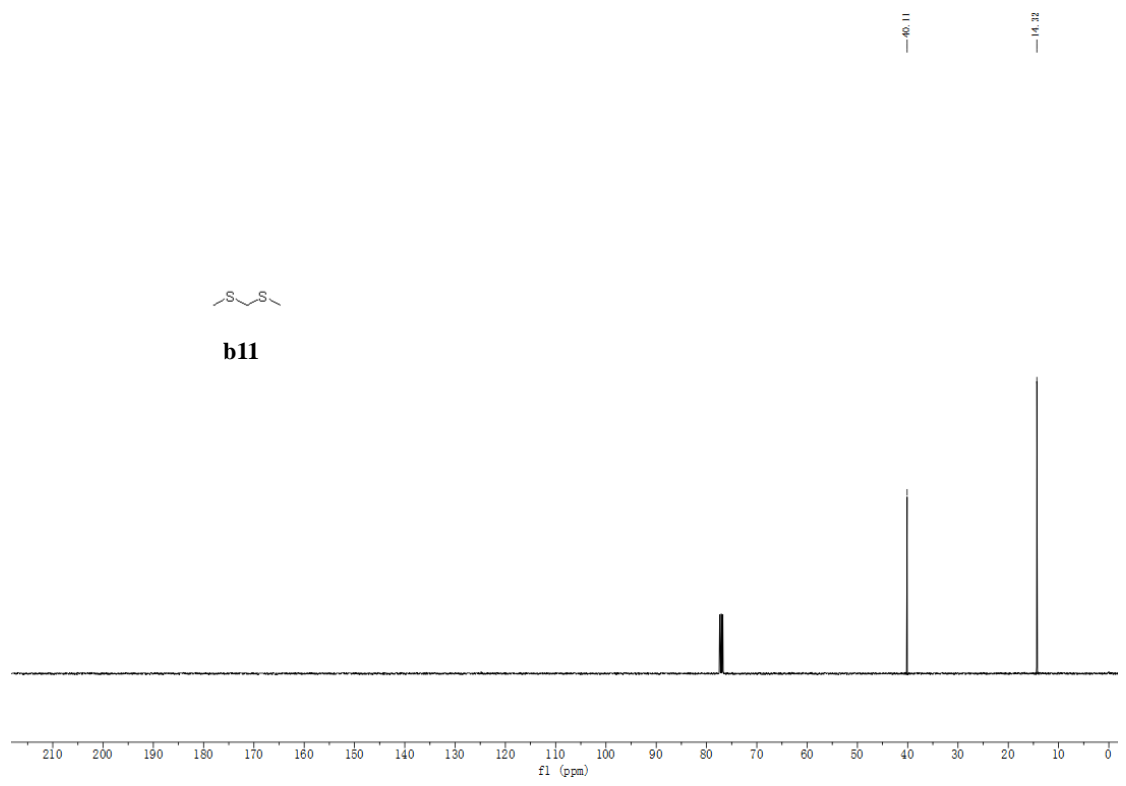

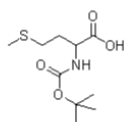

**b12**

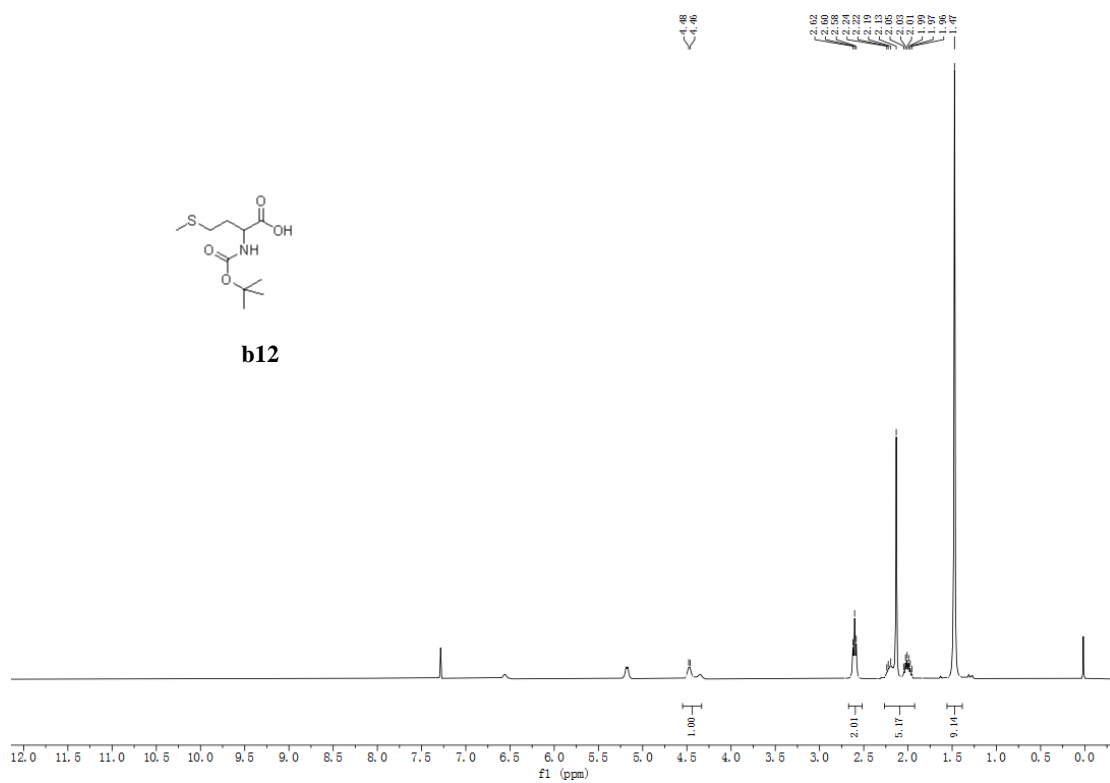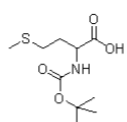

**b12**

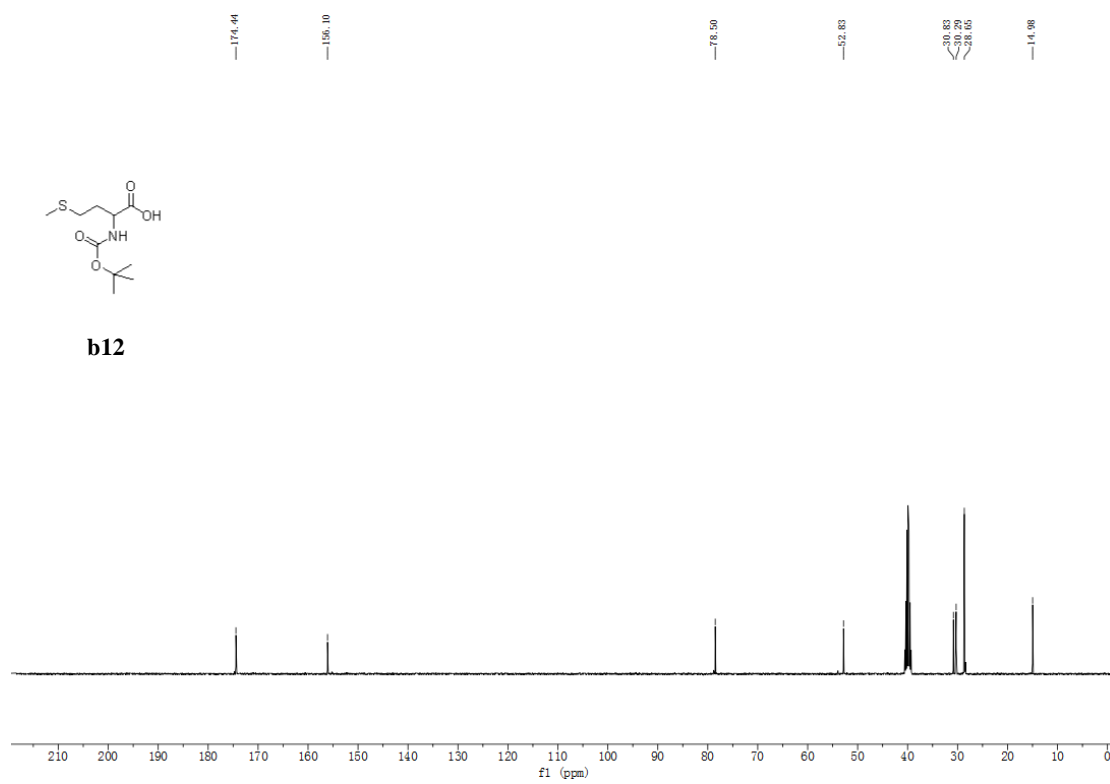

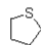

**b13**

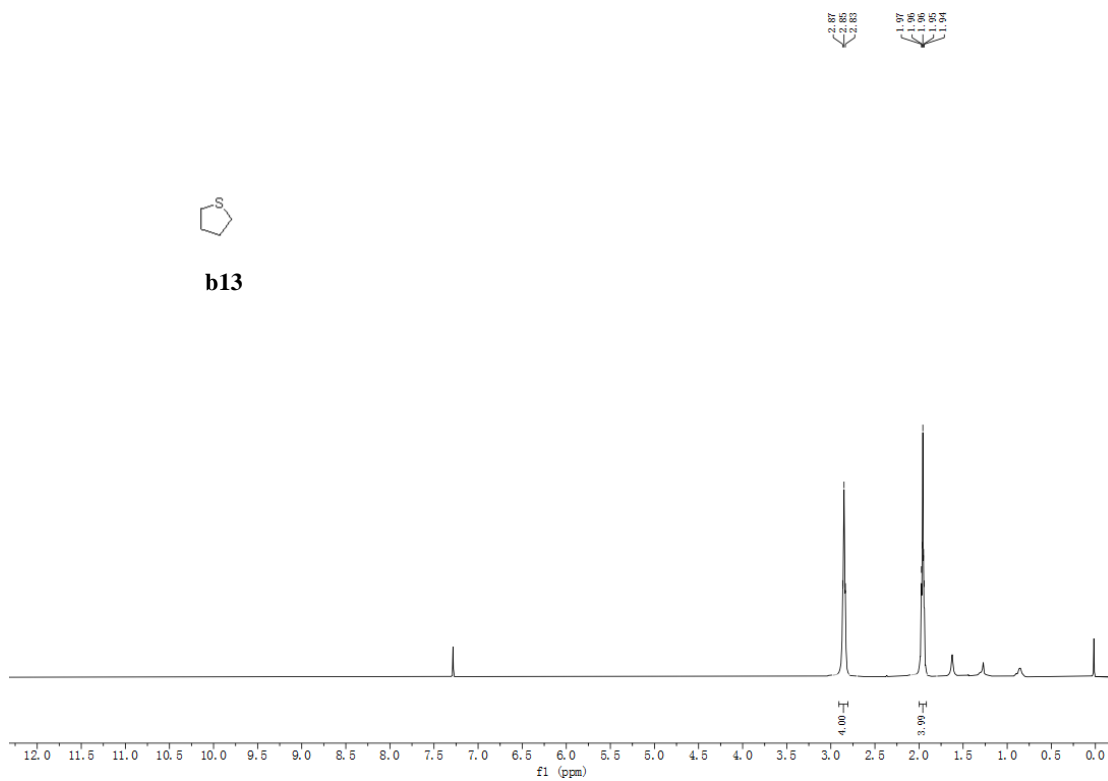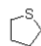

**b13**

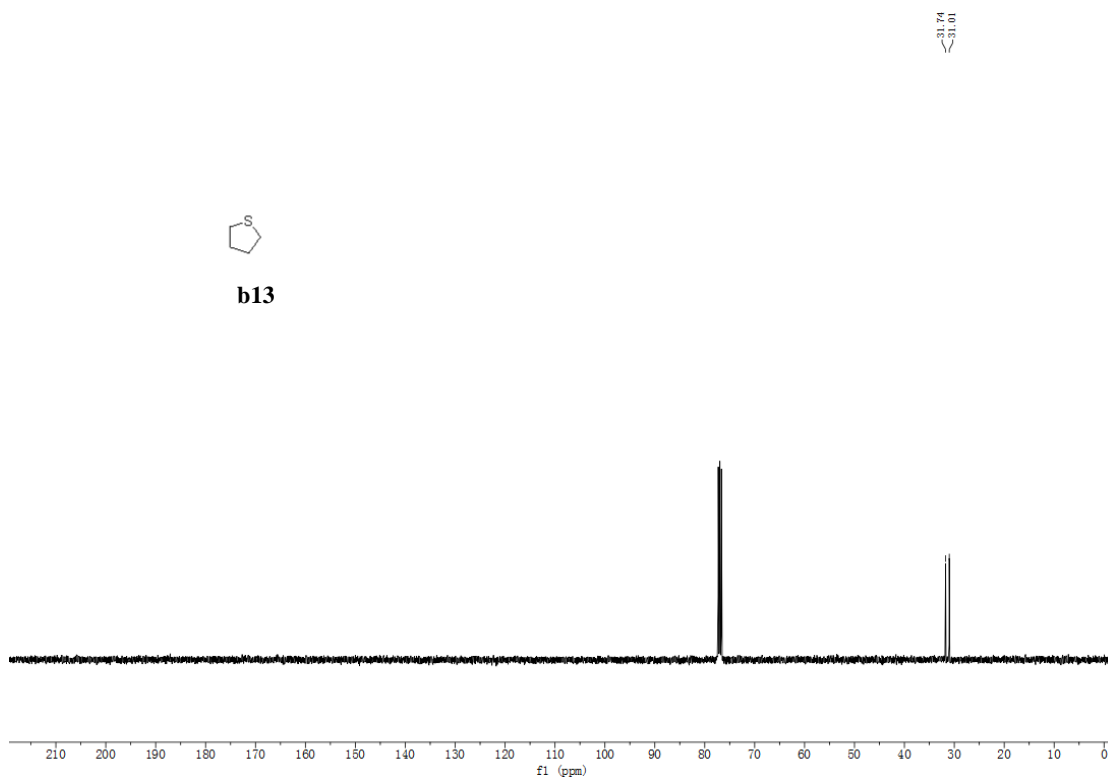

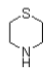

**b14**

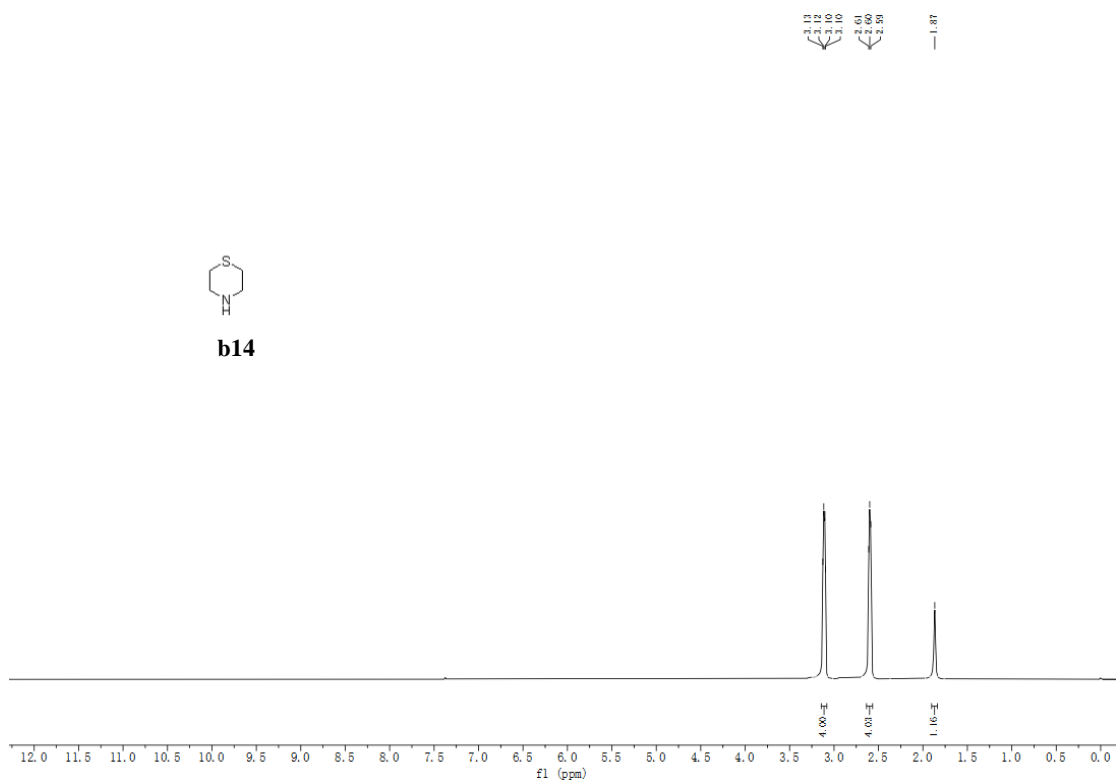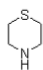

**b14**

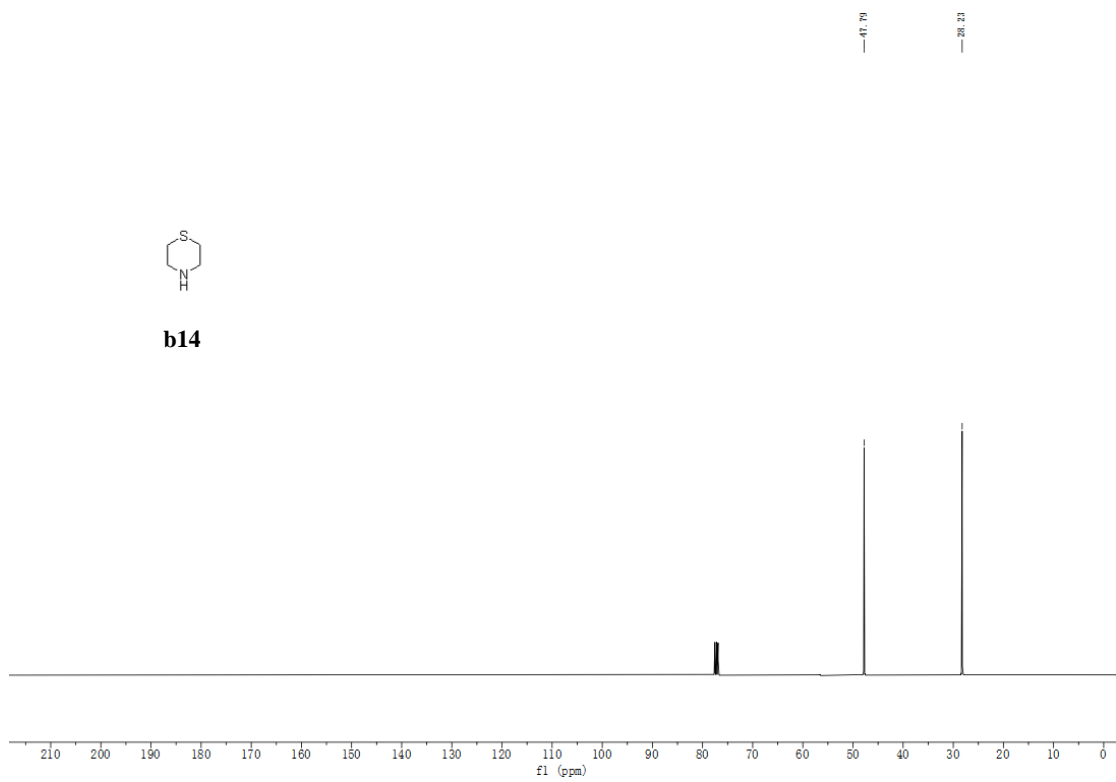



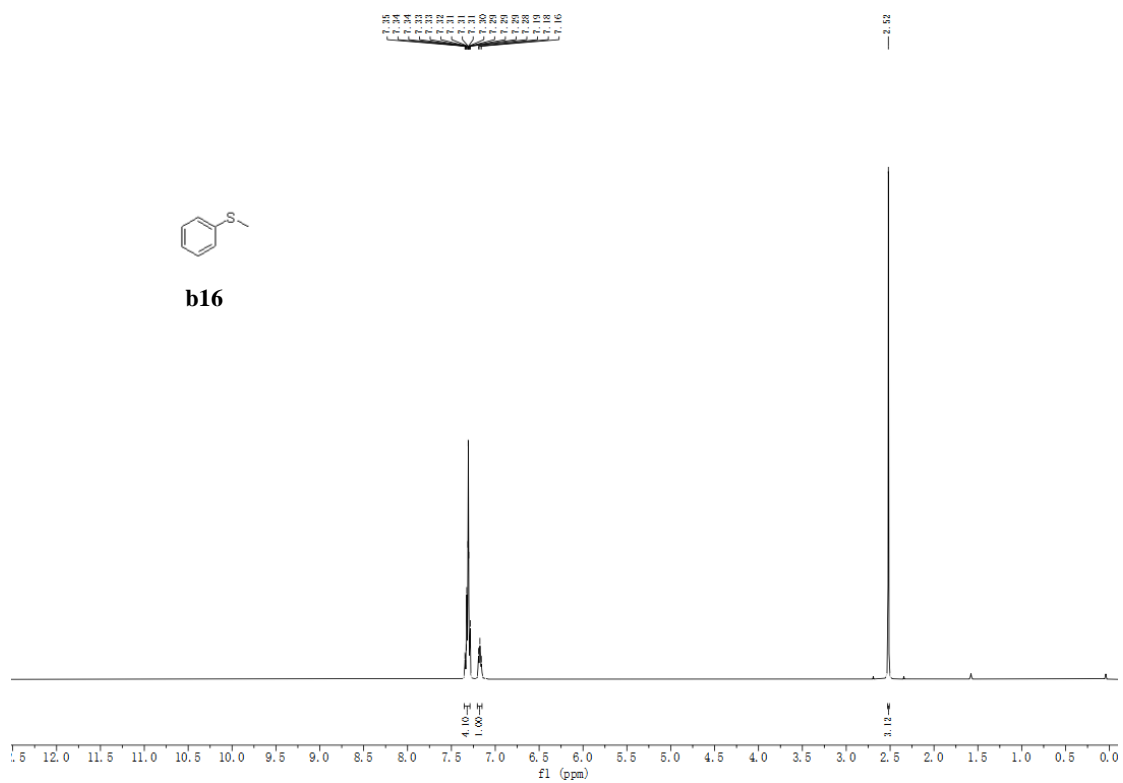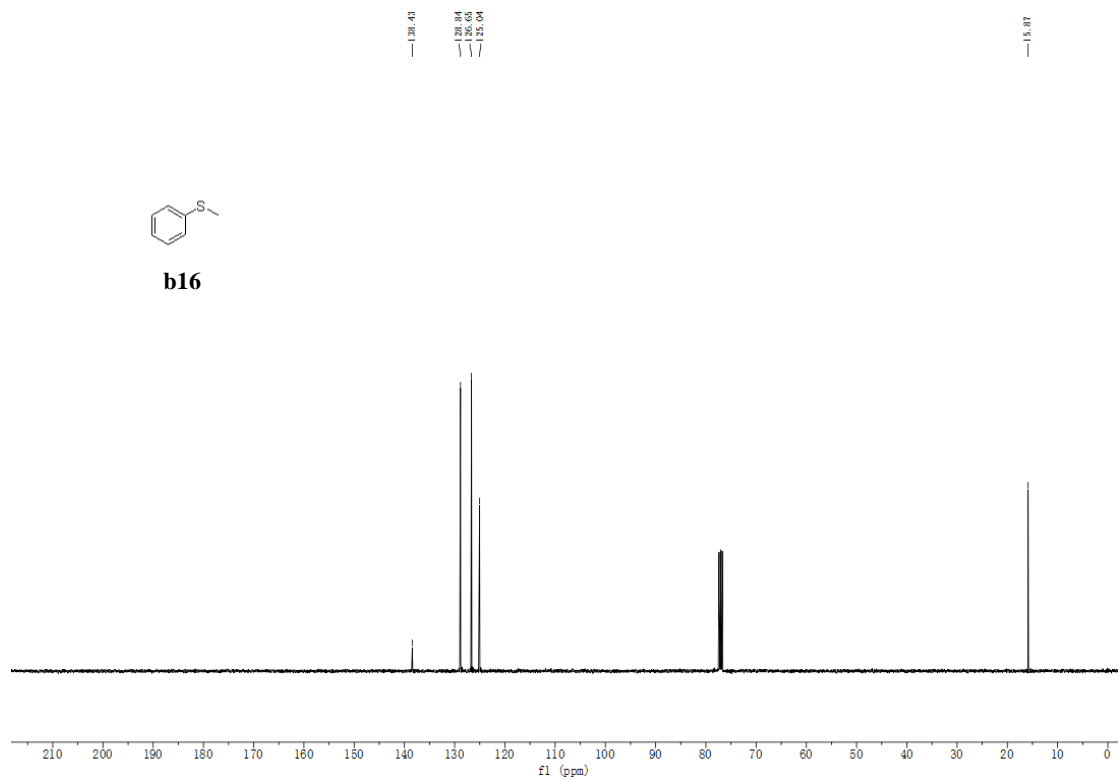

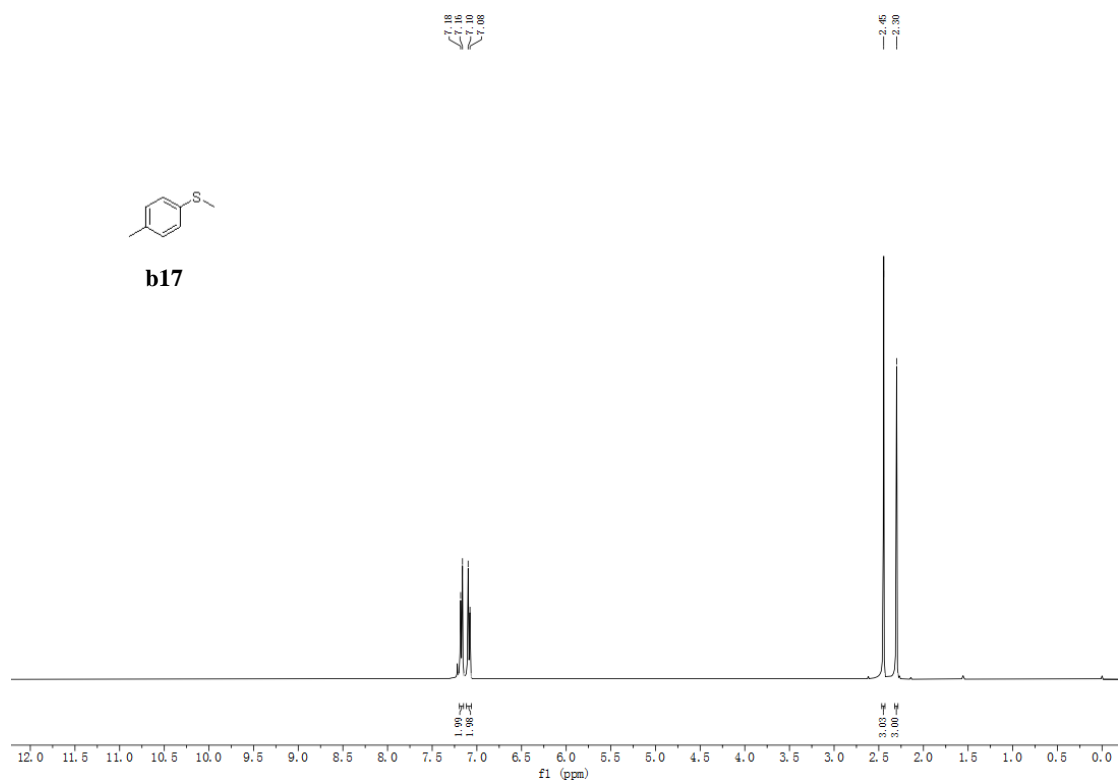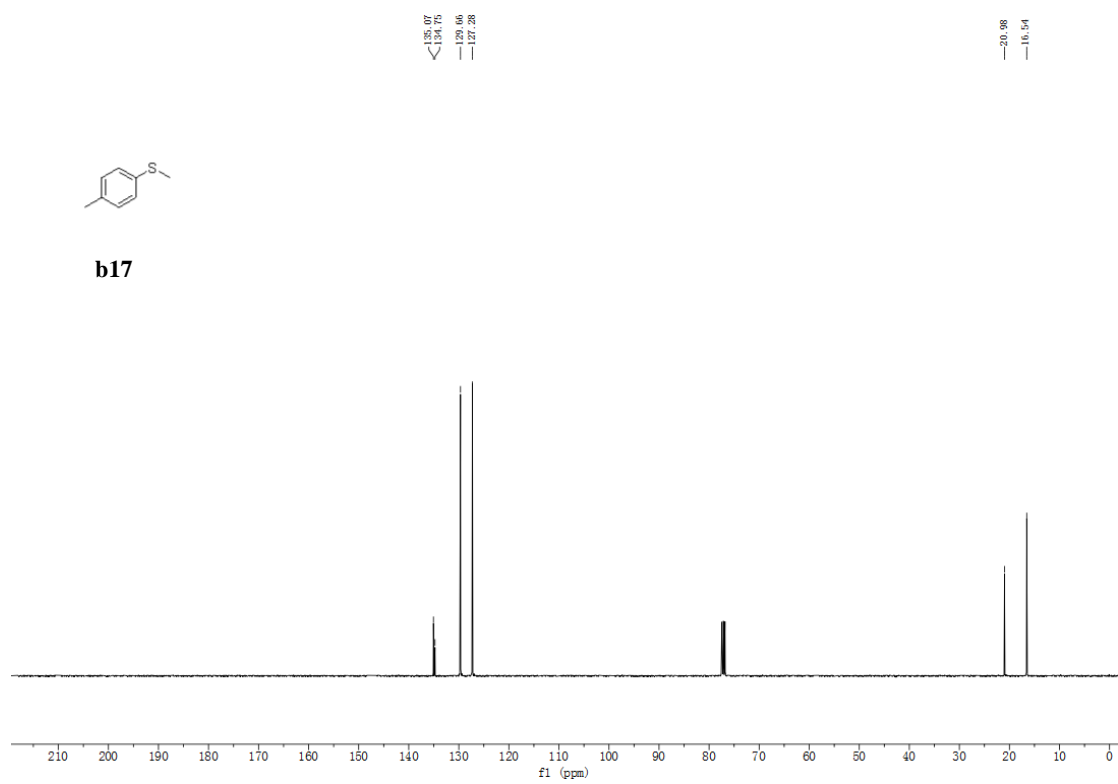



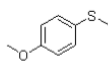

**b18**

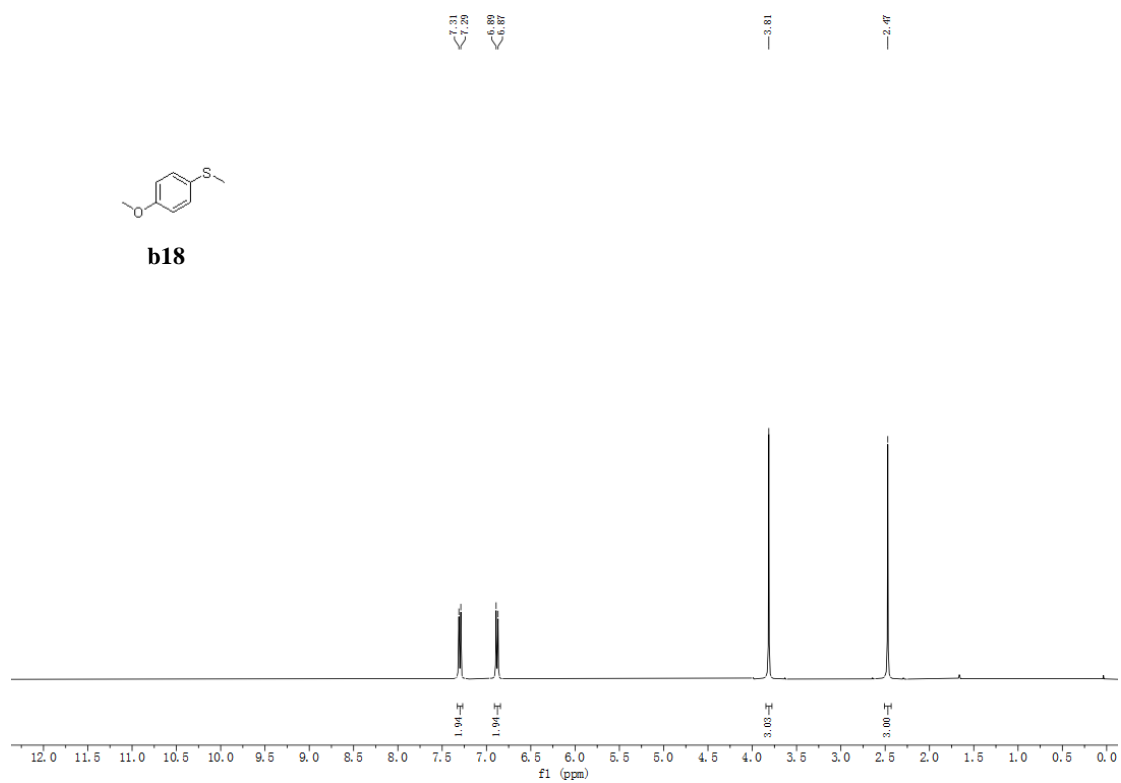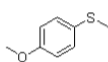

**b18**

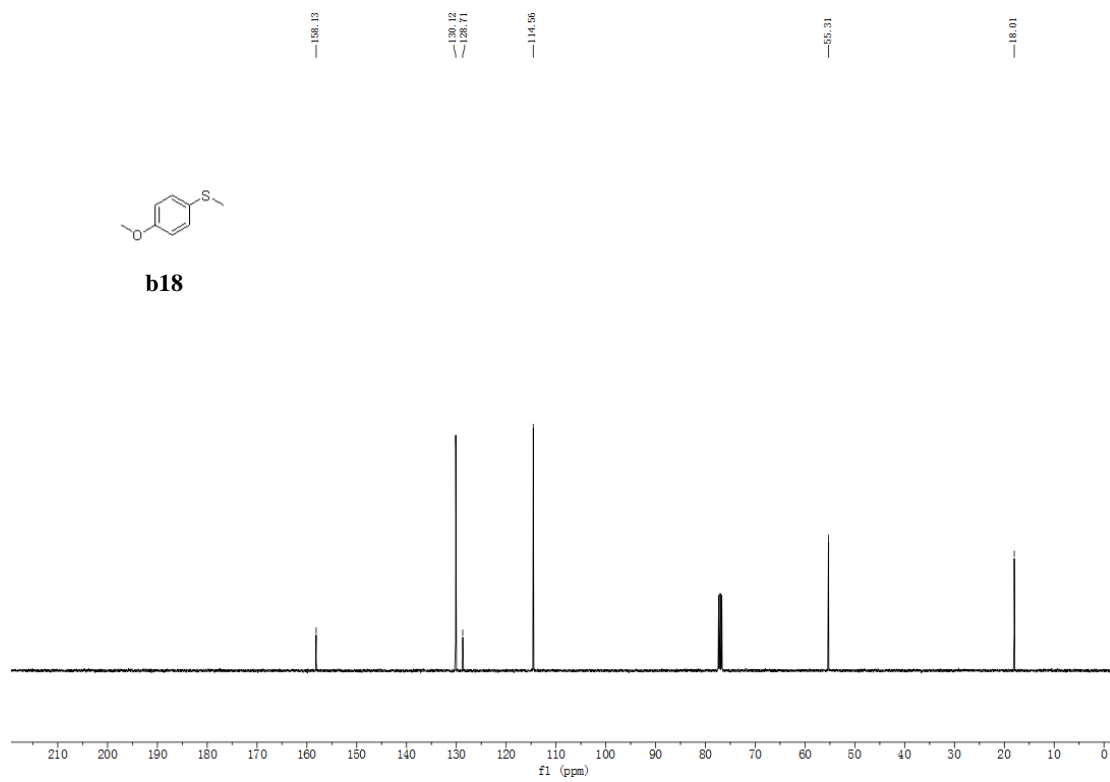

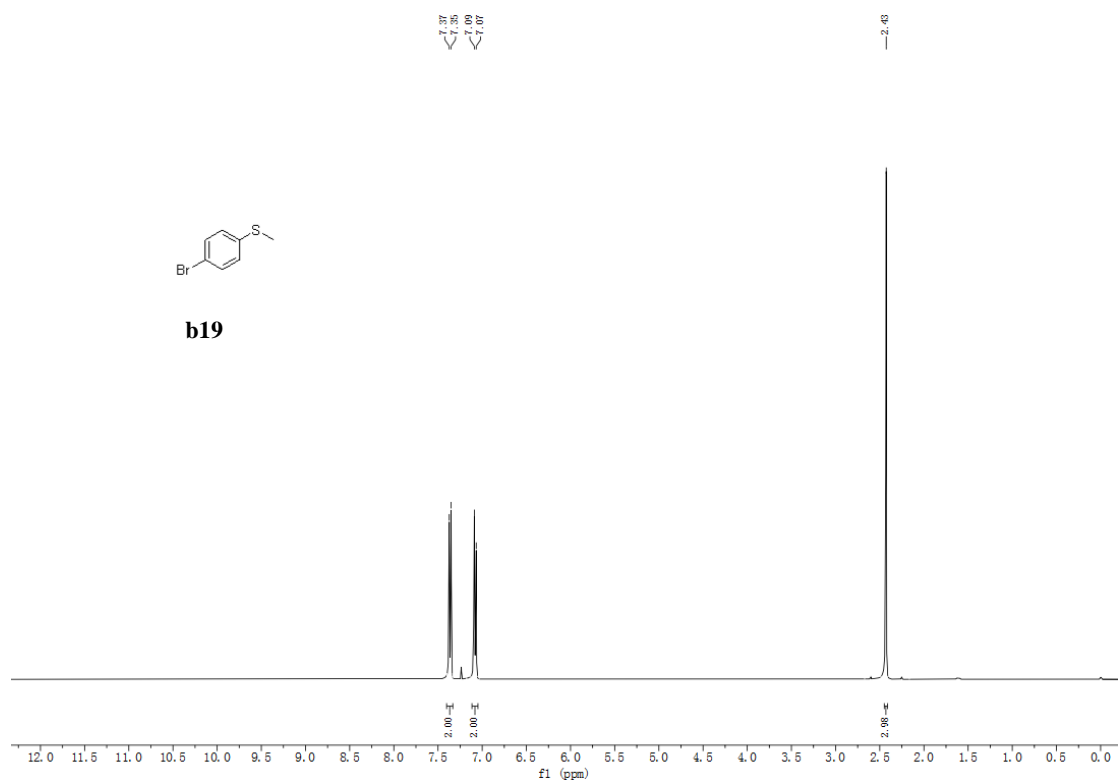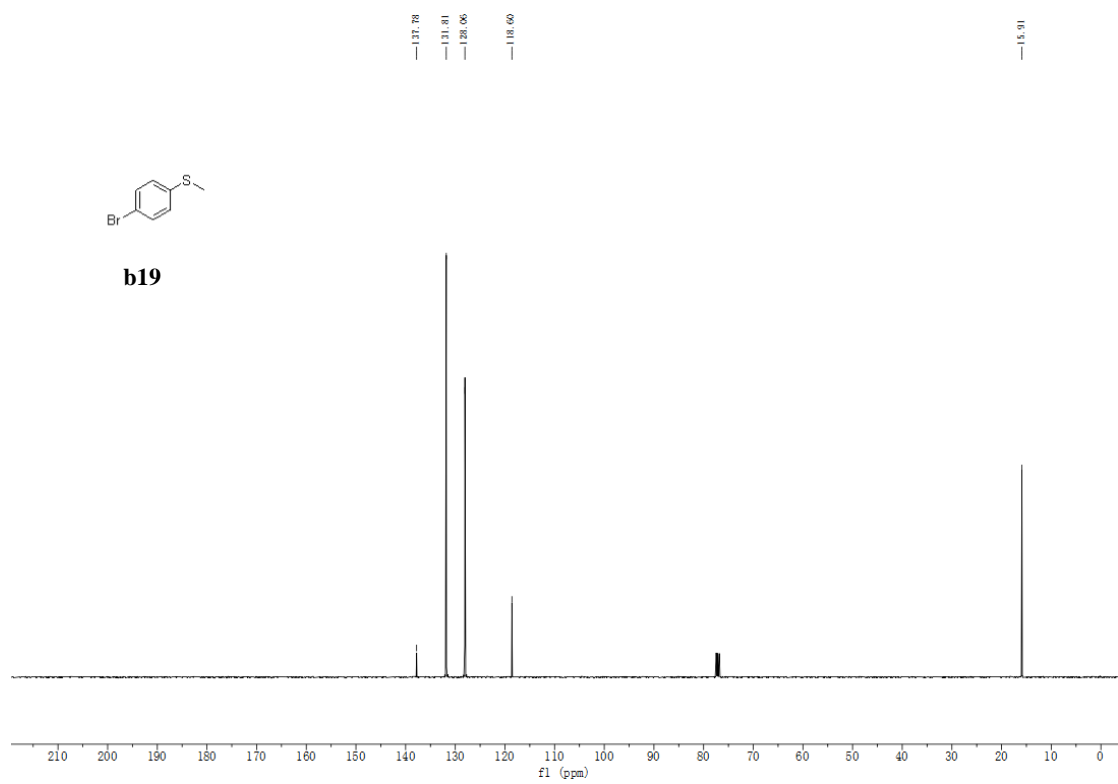

12.88

7.89  
7.88  
7.86  
7.36  
7.34

2.53

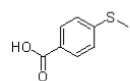

**b20**

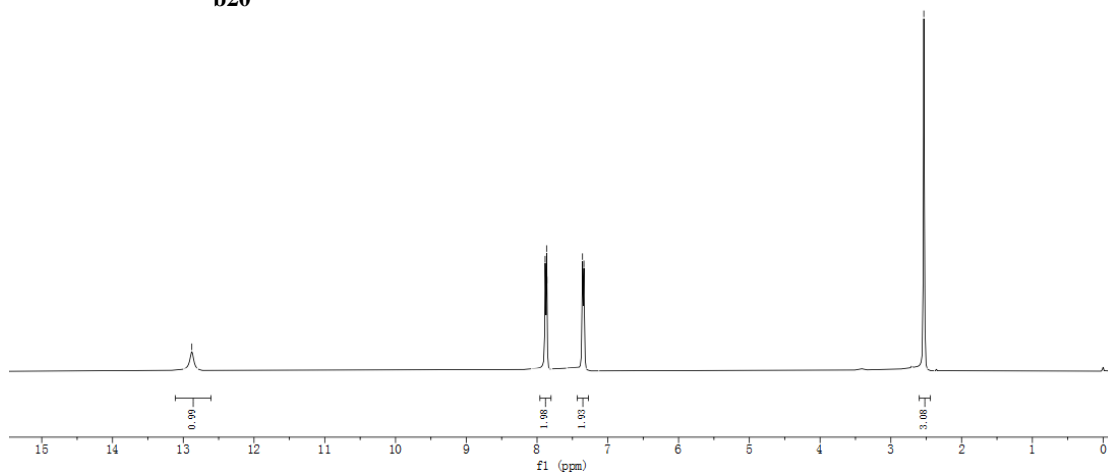

167.52

146.20

135.14  
127.14  
126.29

14.39

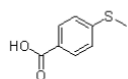

**b20**

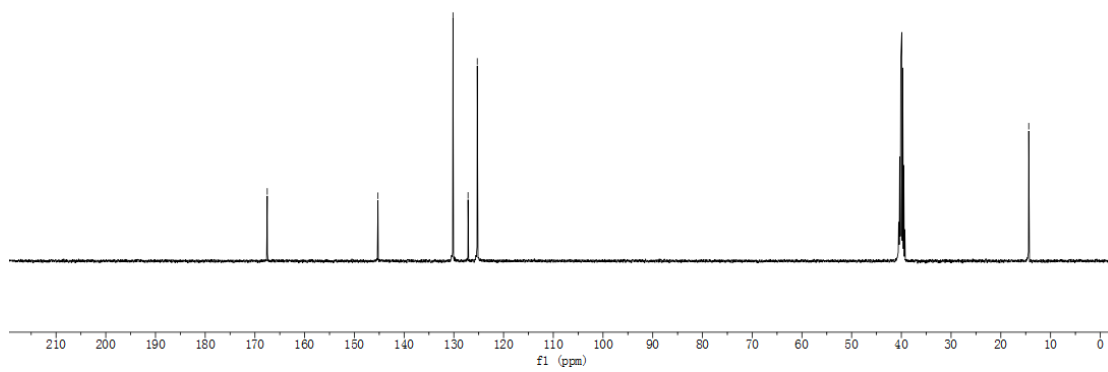

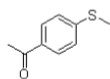

**b21**

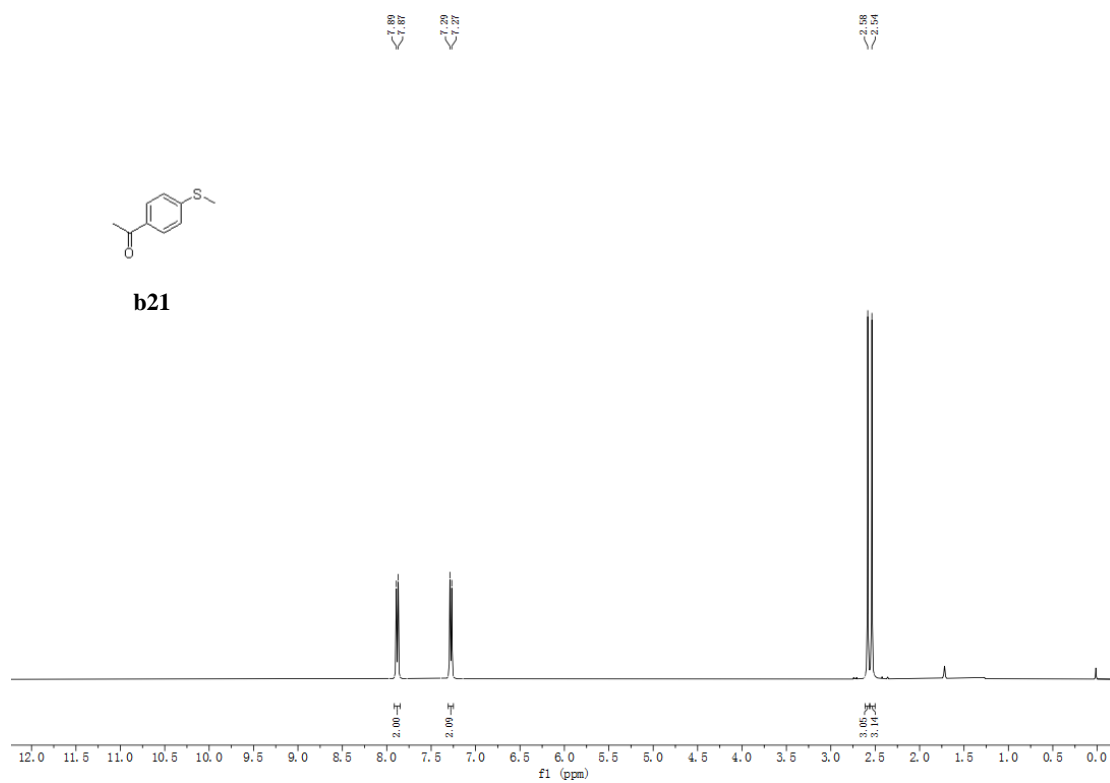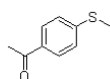

**b21**

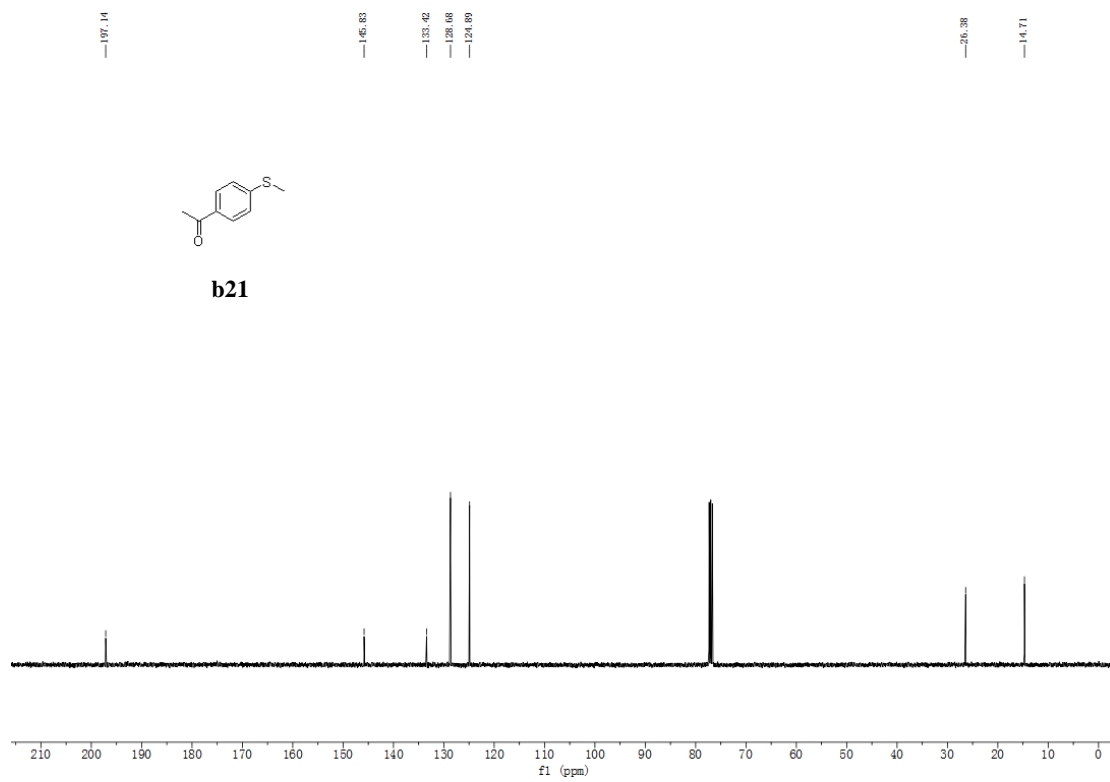

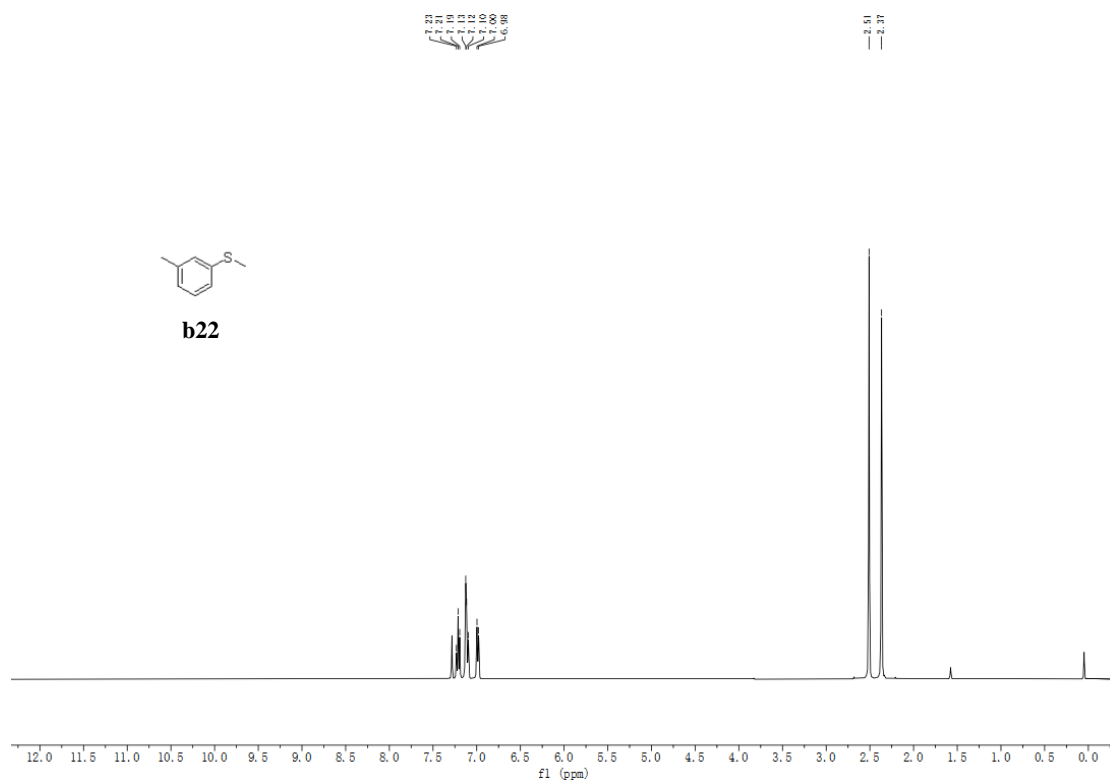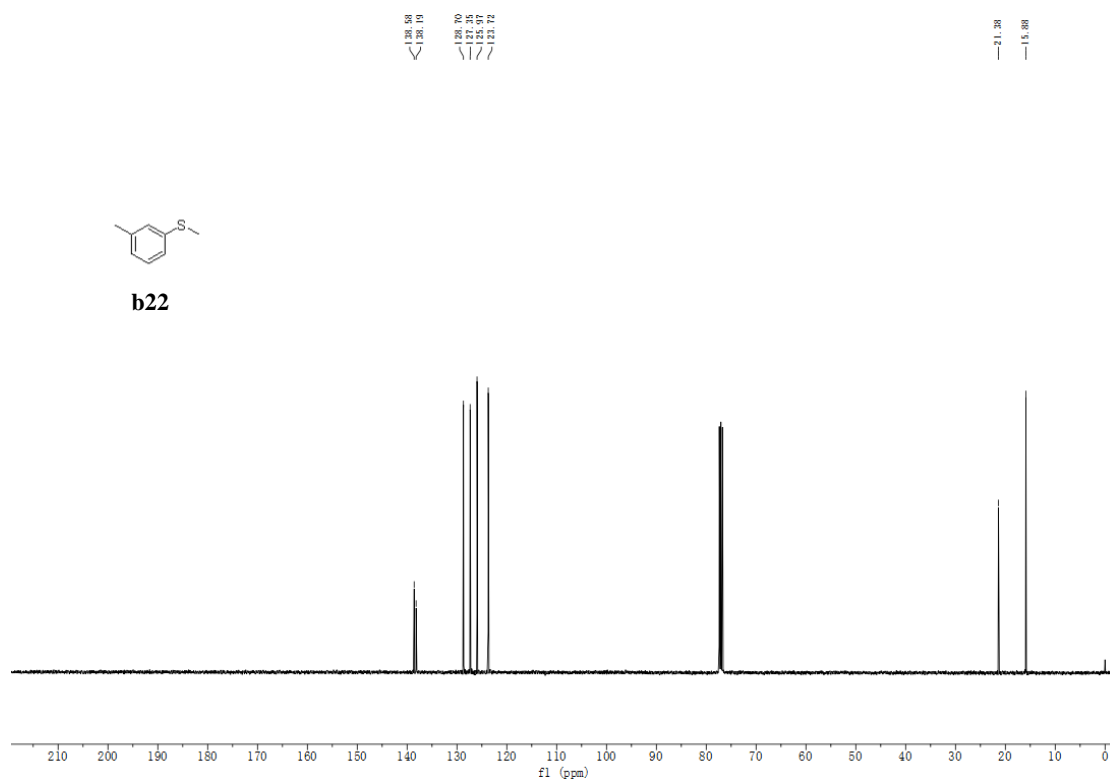

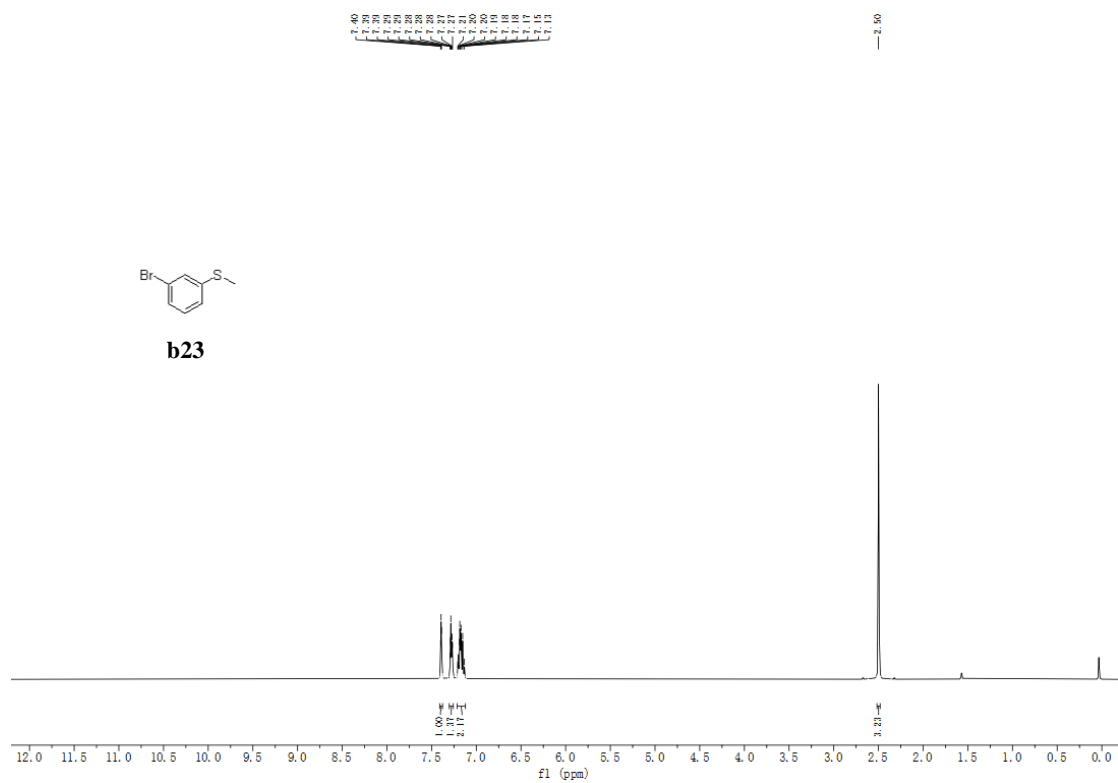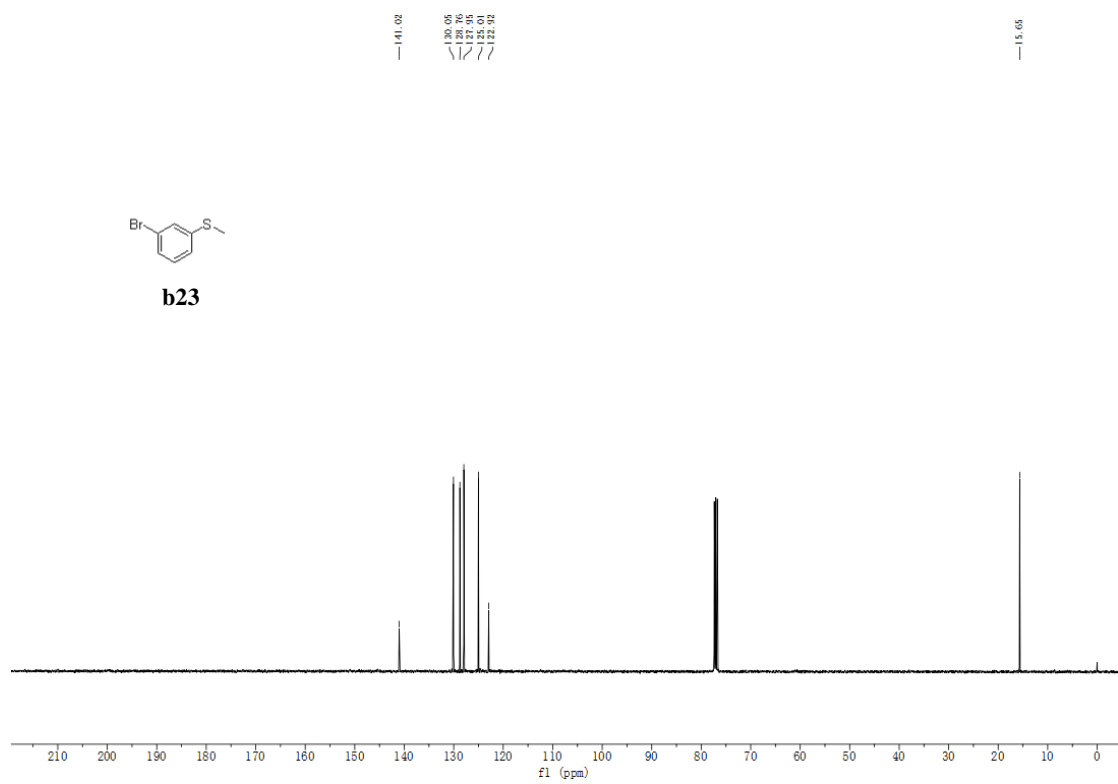

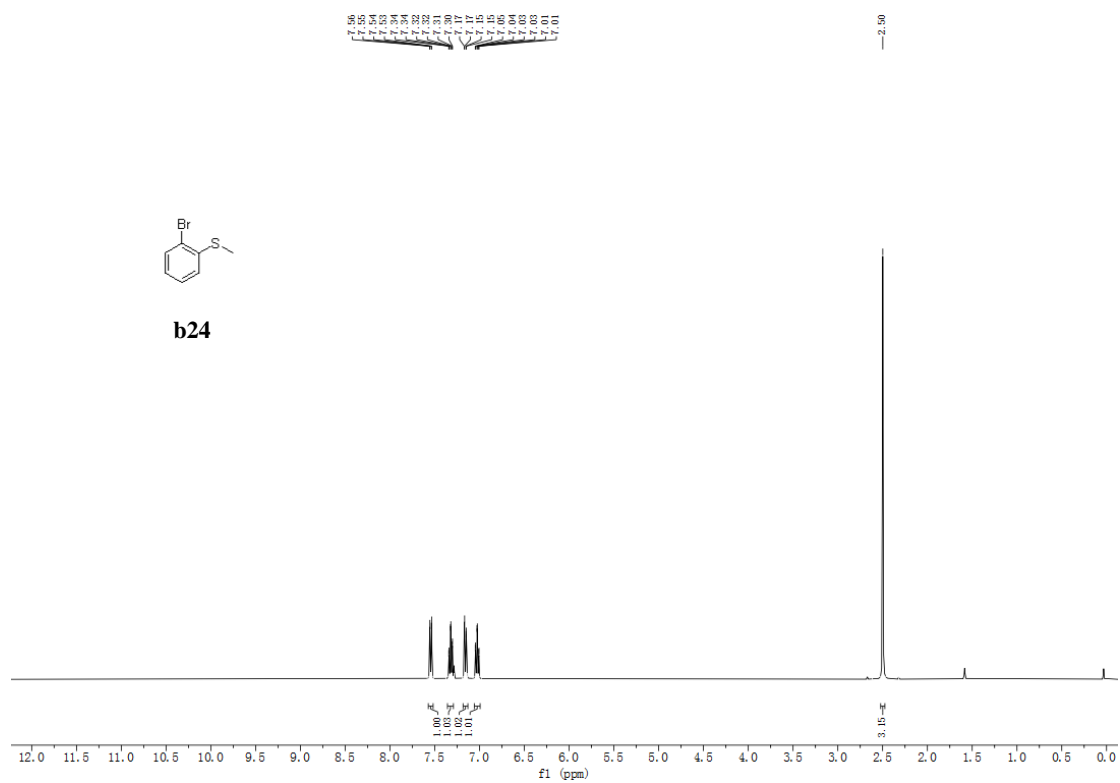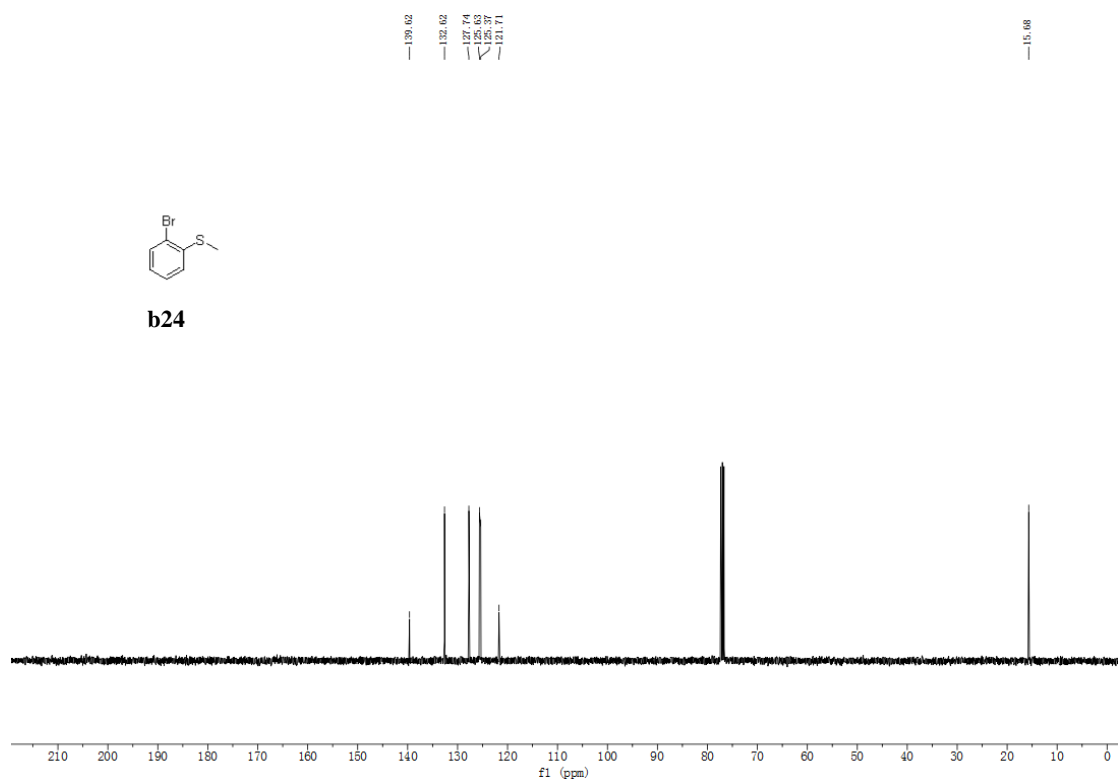

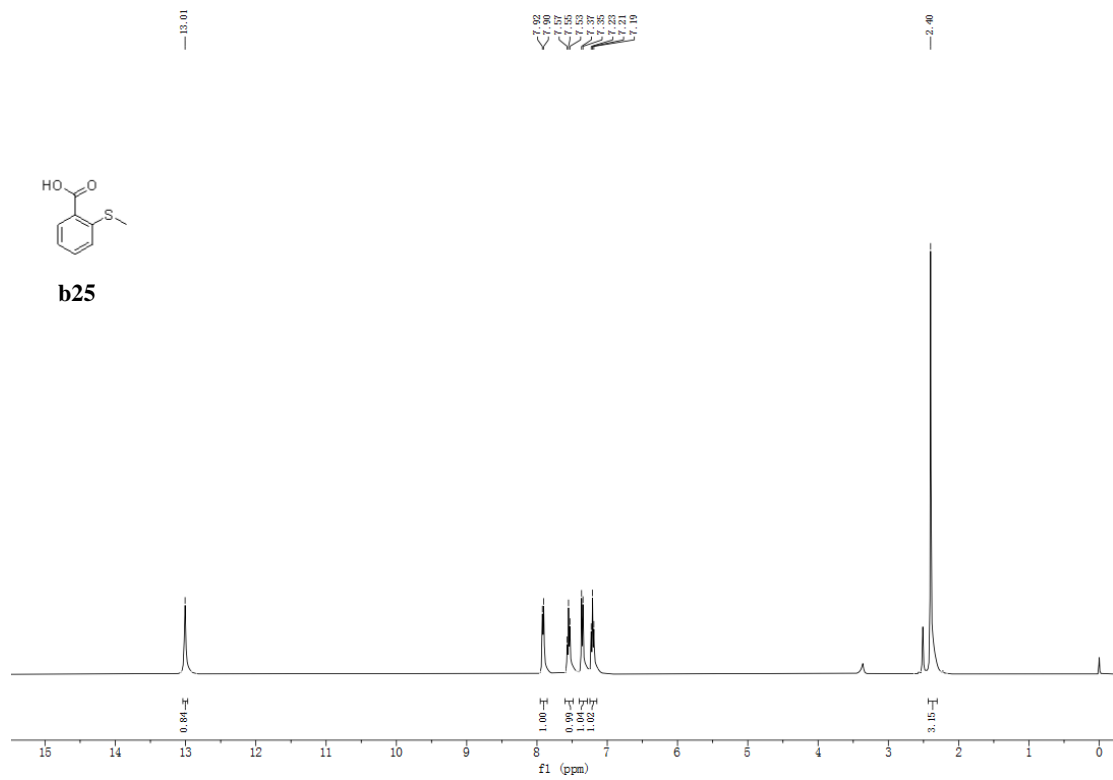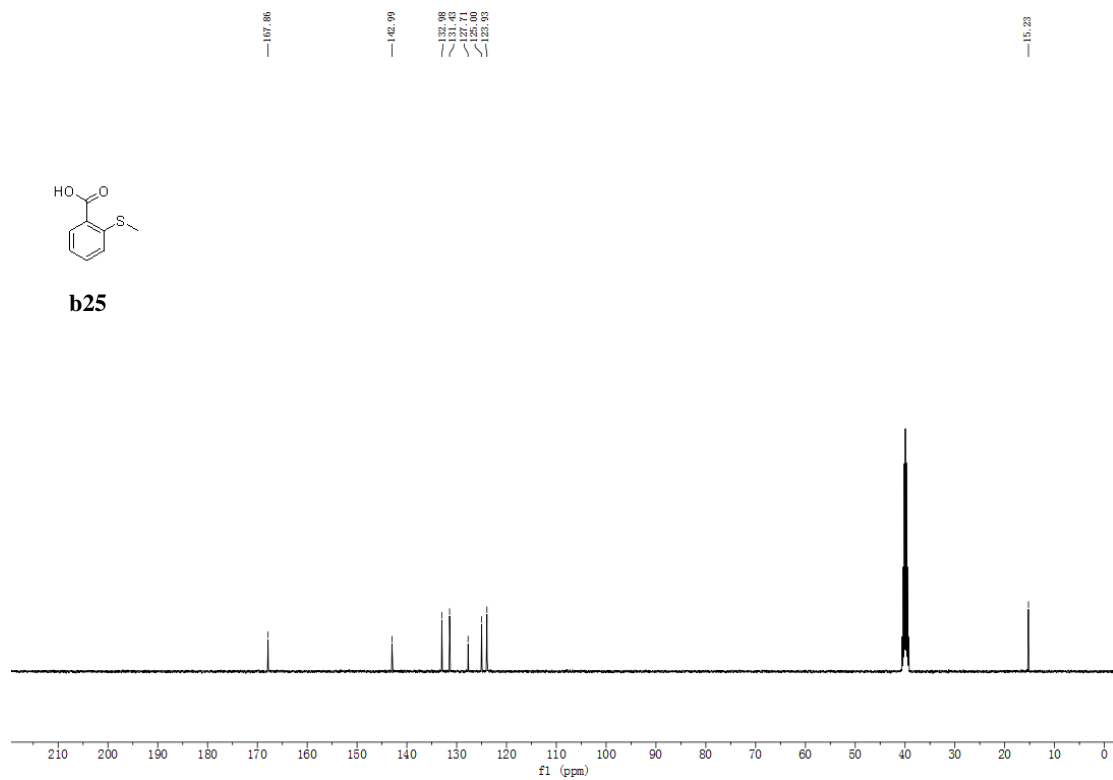



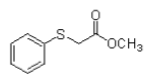

**b26**

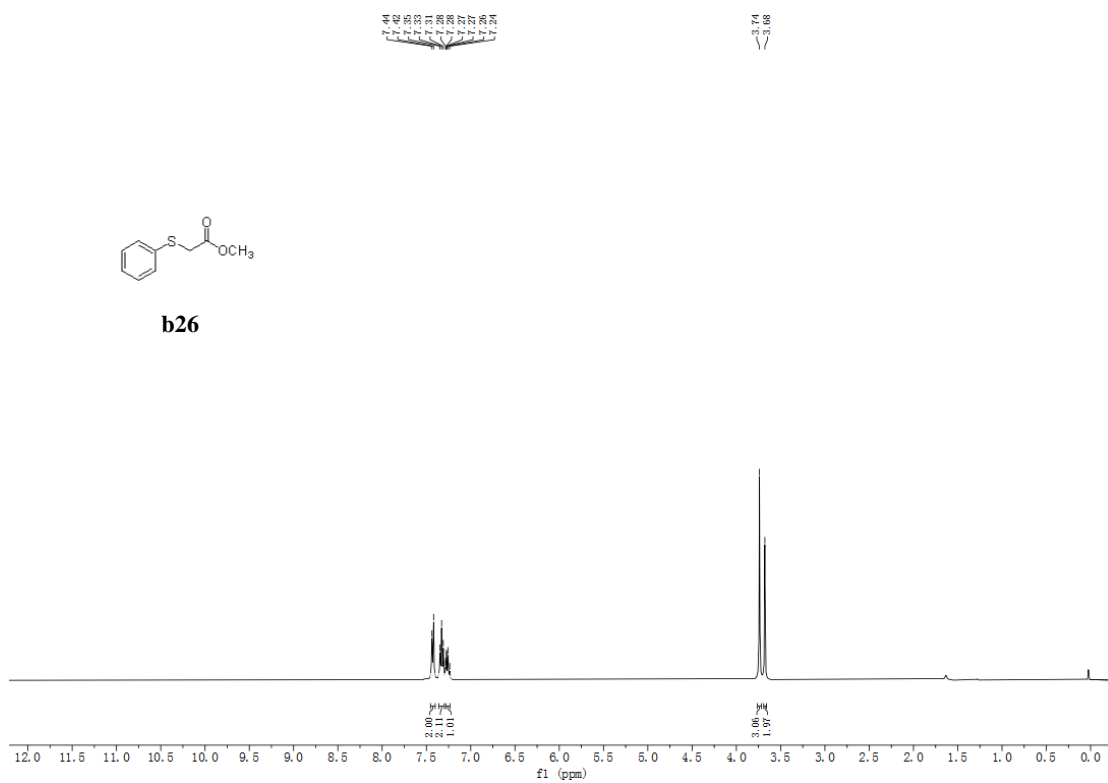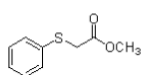

**b26**

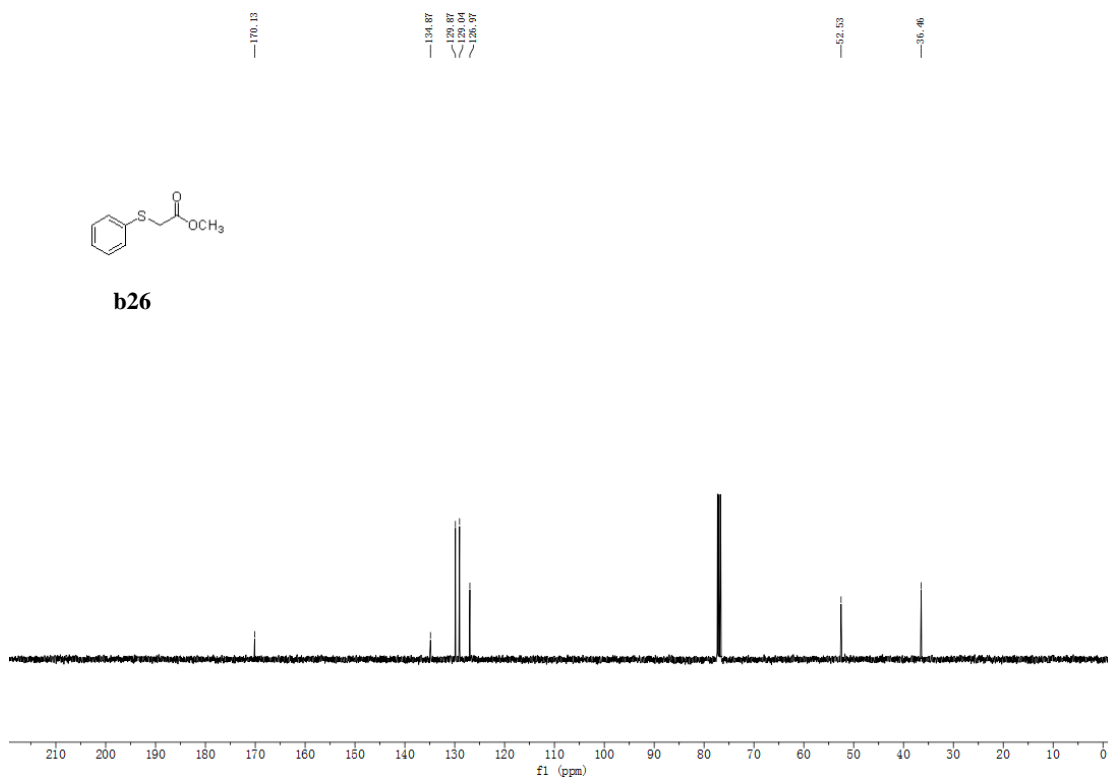

7.87  
7.85  
7.51  
7.49  
7.48  
7.46  
7.42  
7.41

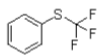

**b27**

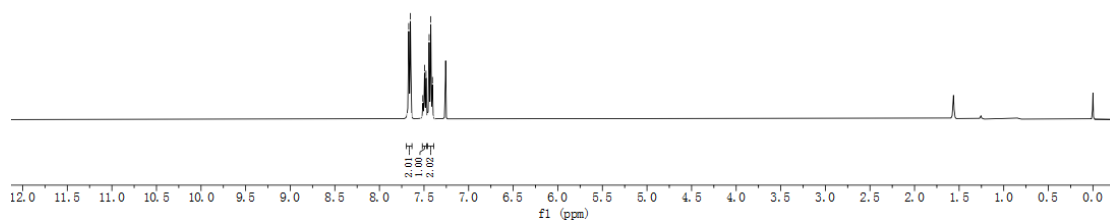

136.35  
134.24  
130.81  
129.48  
127.05  
124.44

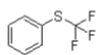

**b27**

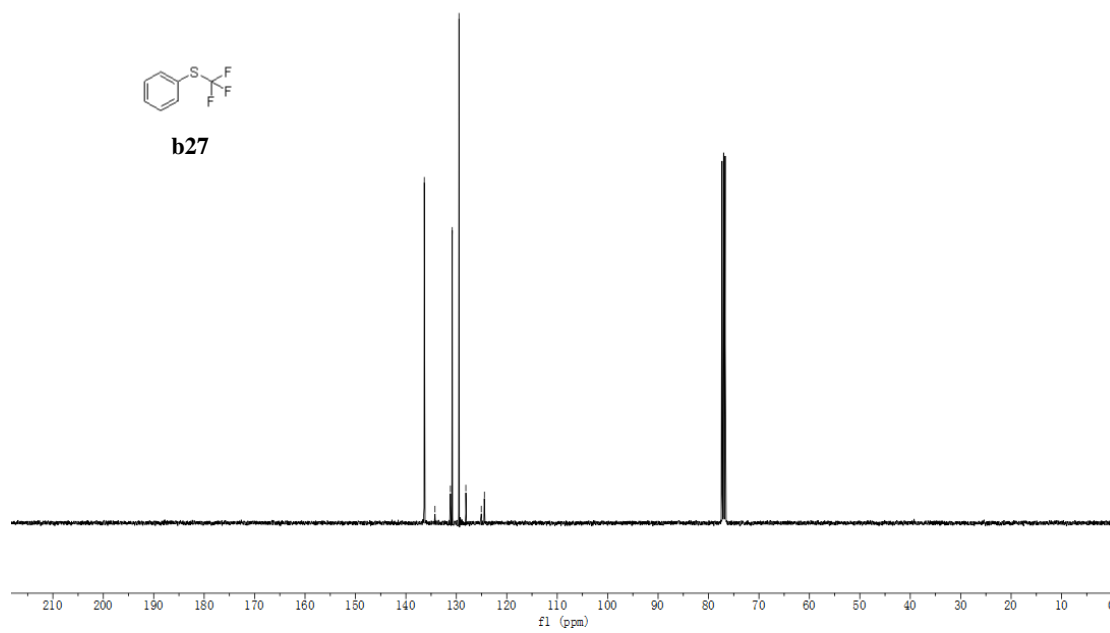

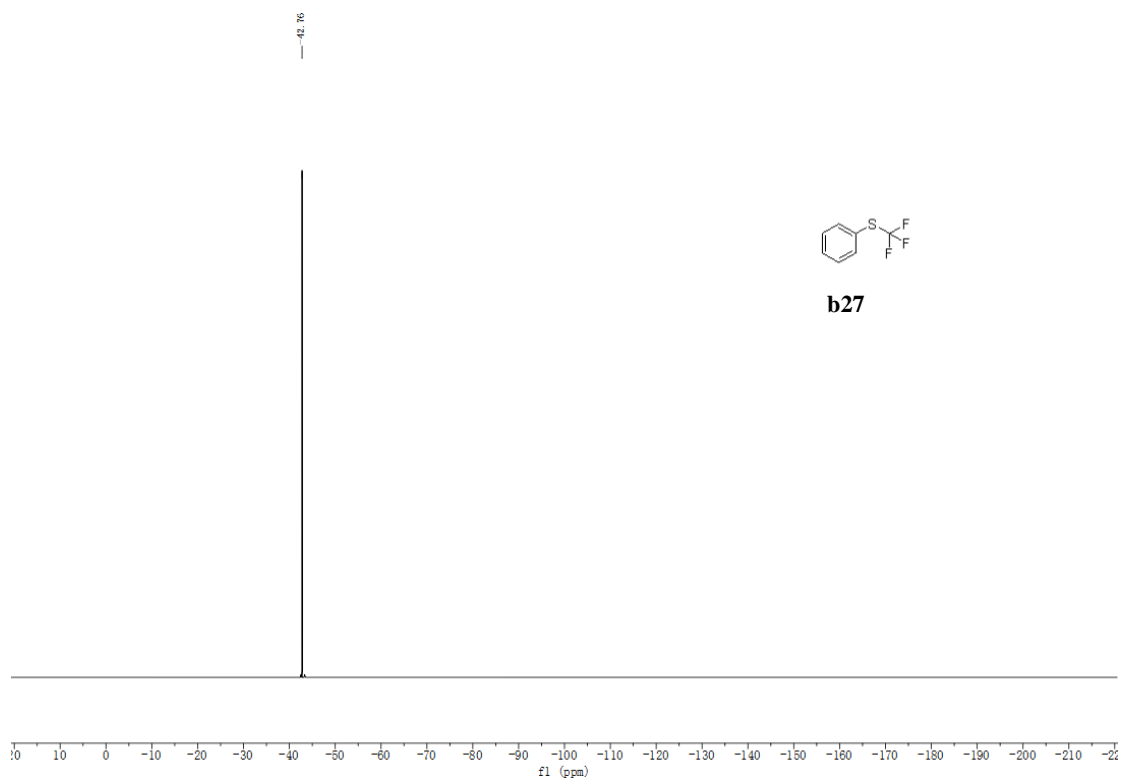

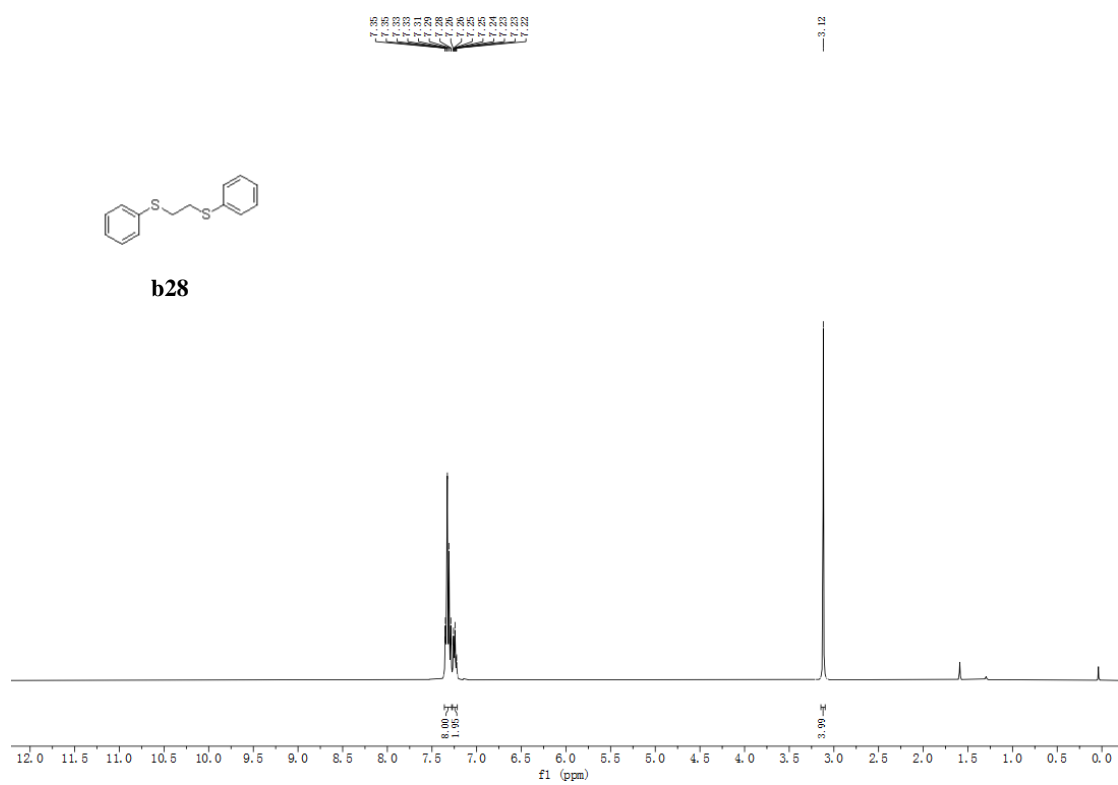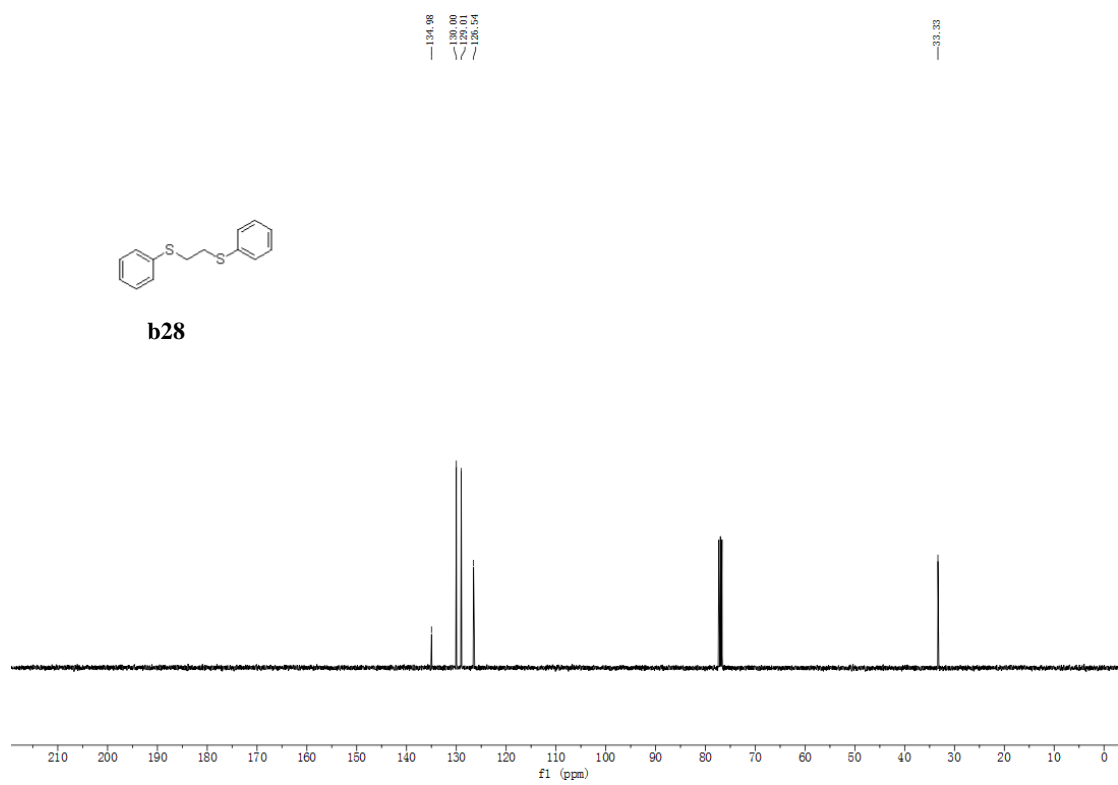

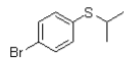

**b29**

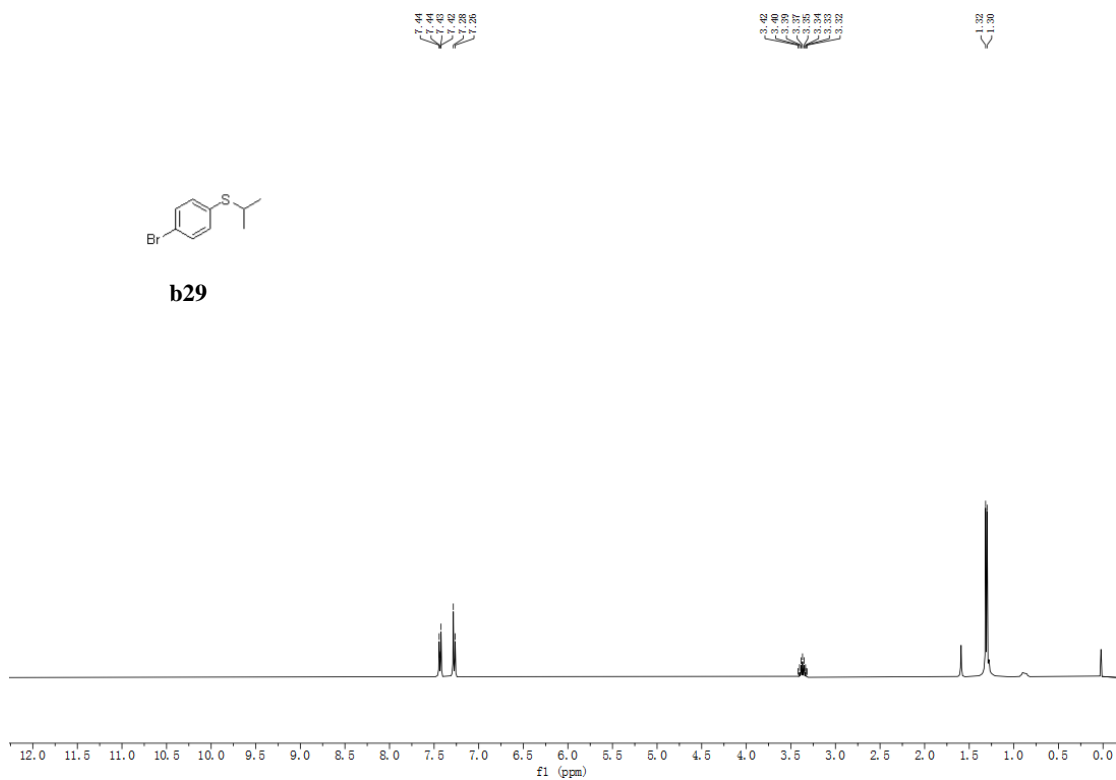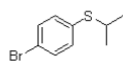

**b29**

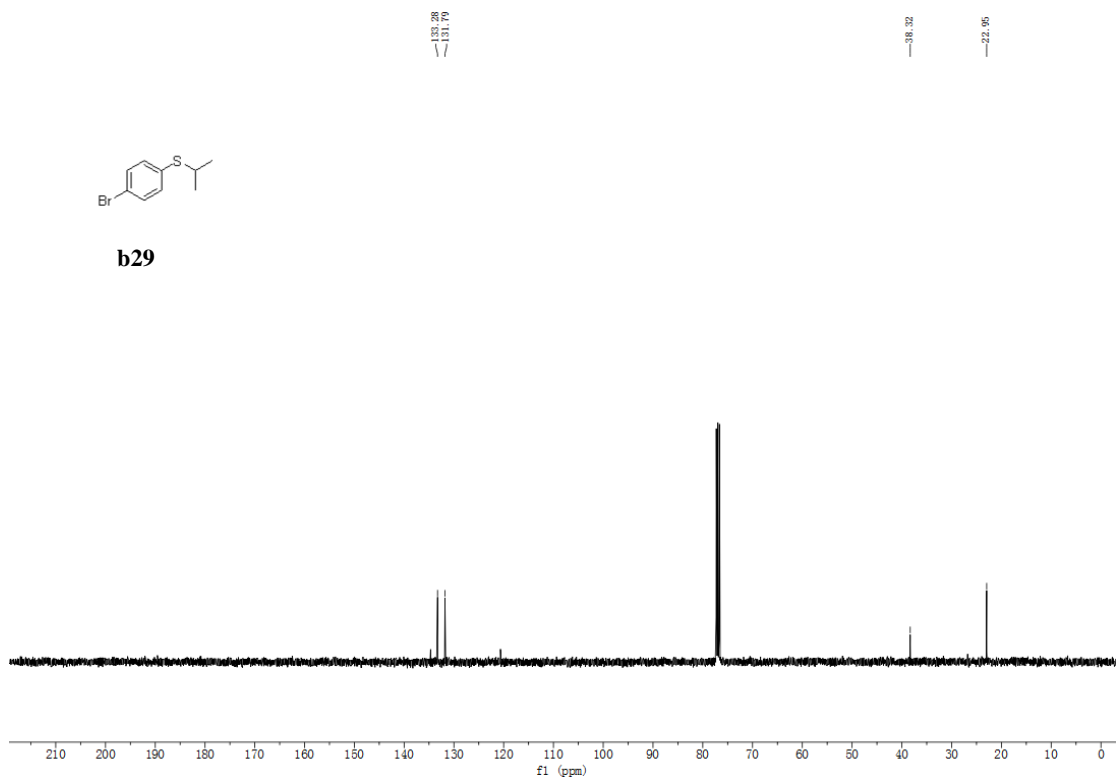

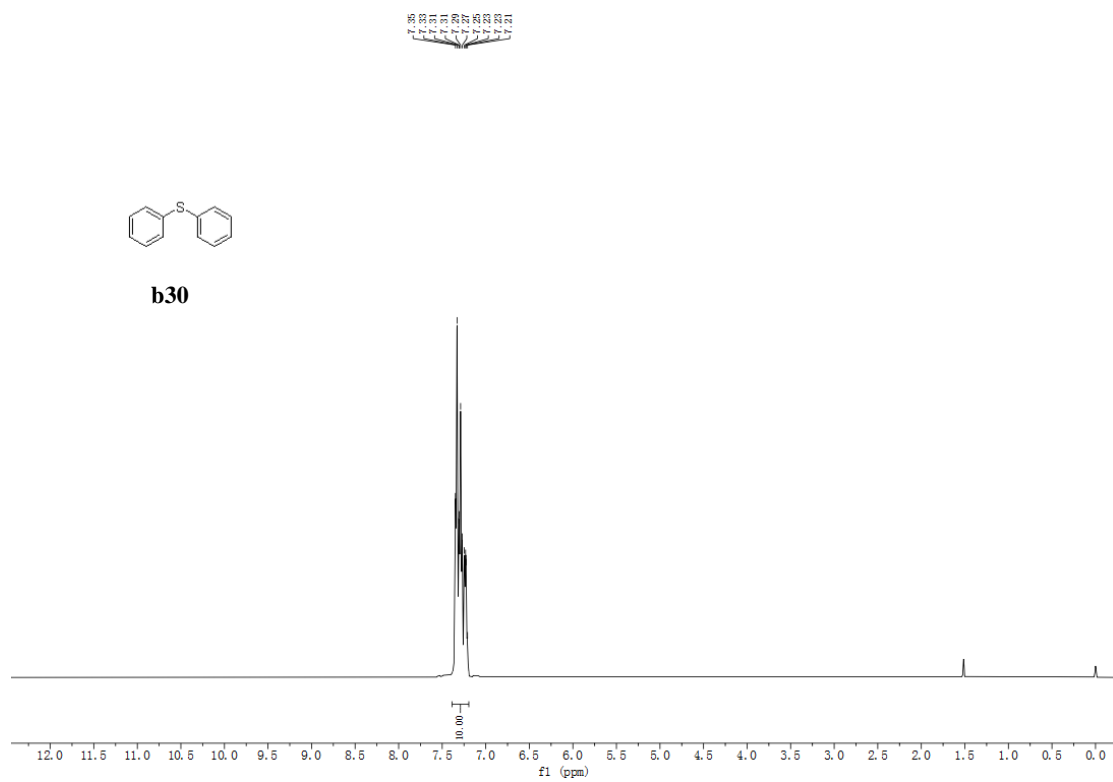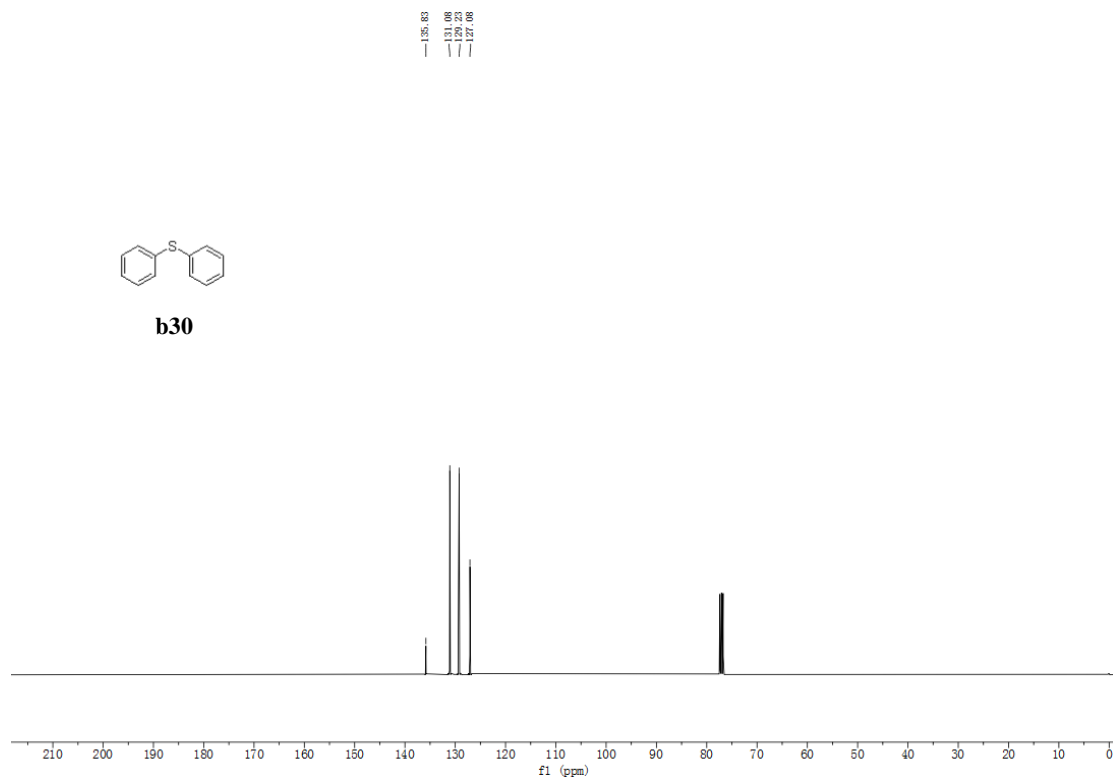

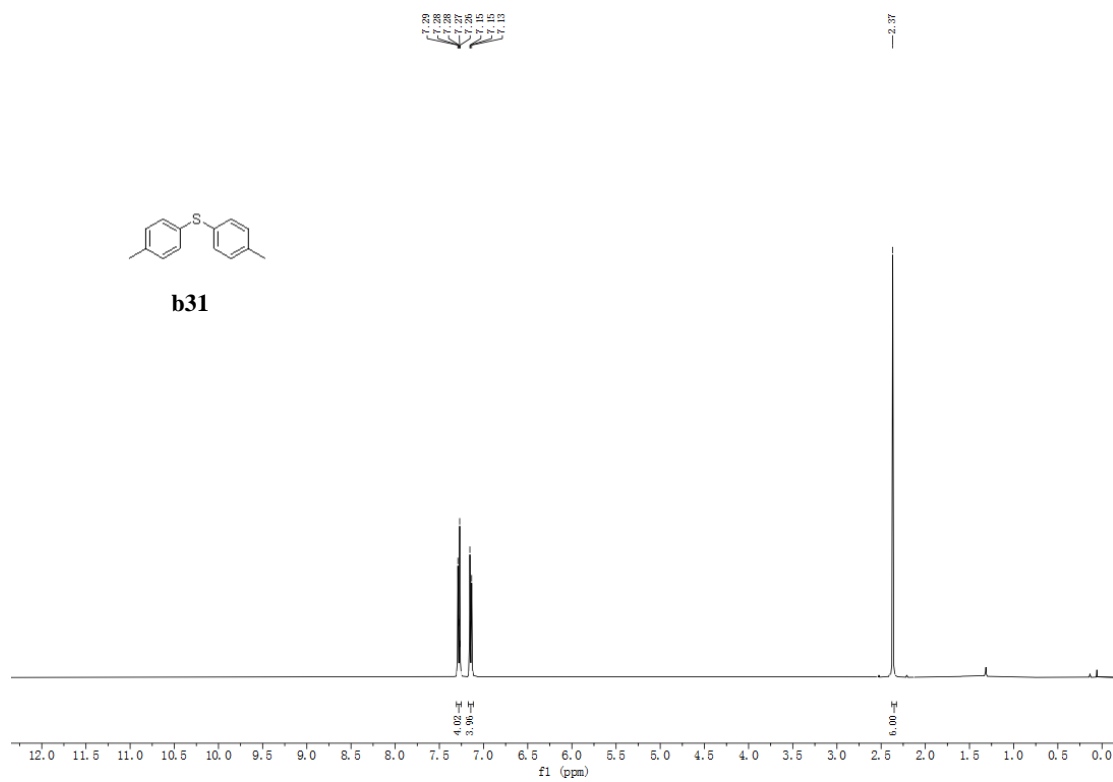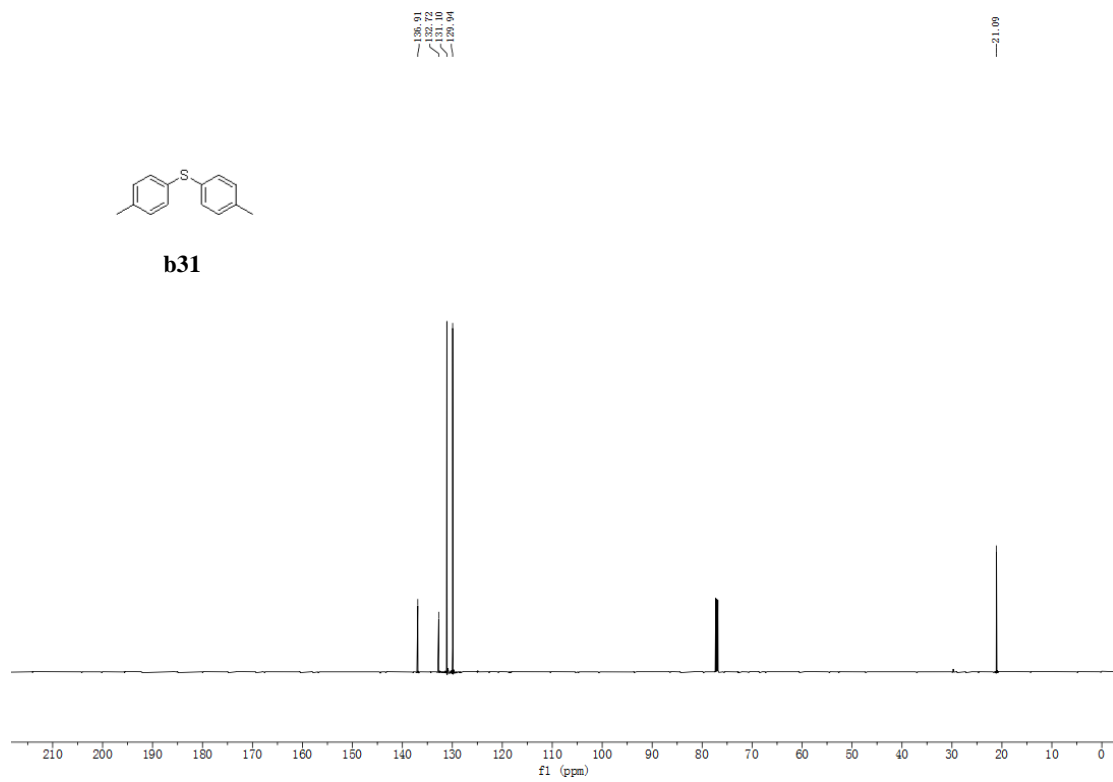

7.32  
7.31  
7.31  
7.30  
7.29  
7.29  
7.26

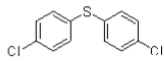

**b32**

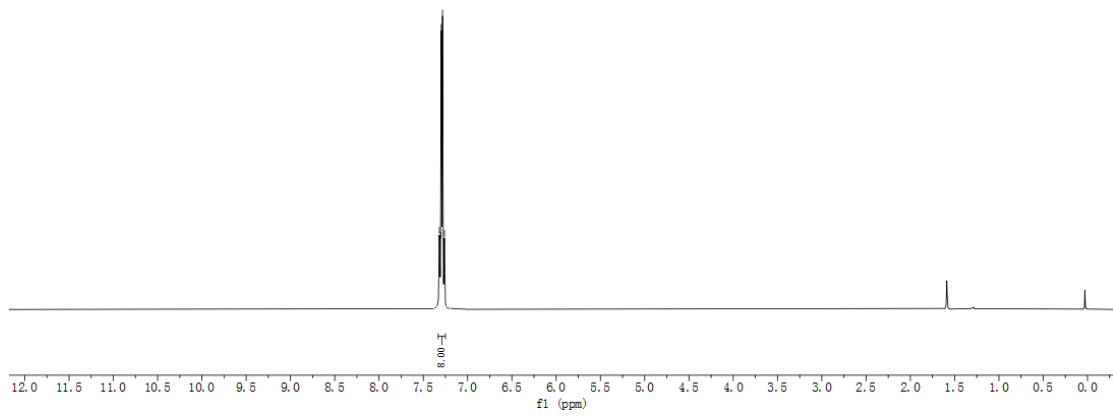

133.88  
132.74  
129.44

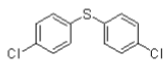

**b32**

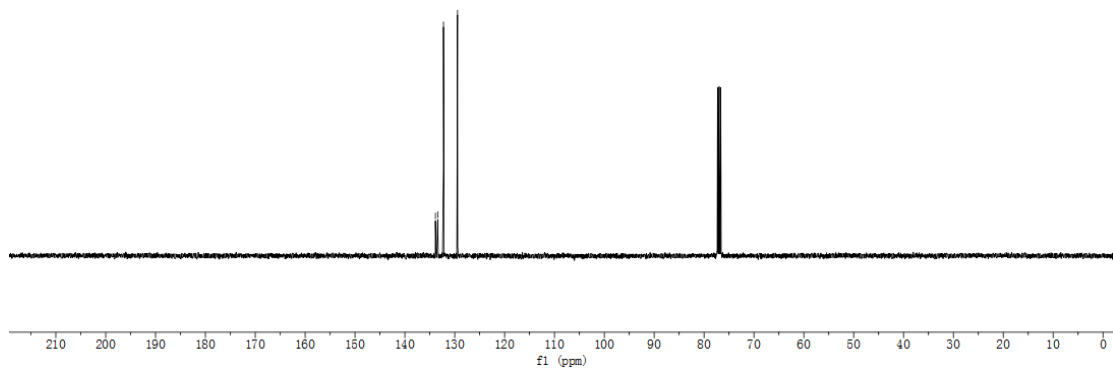



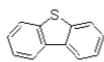

**b33**

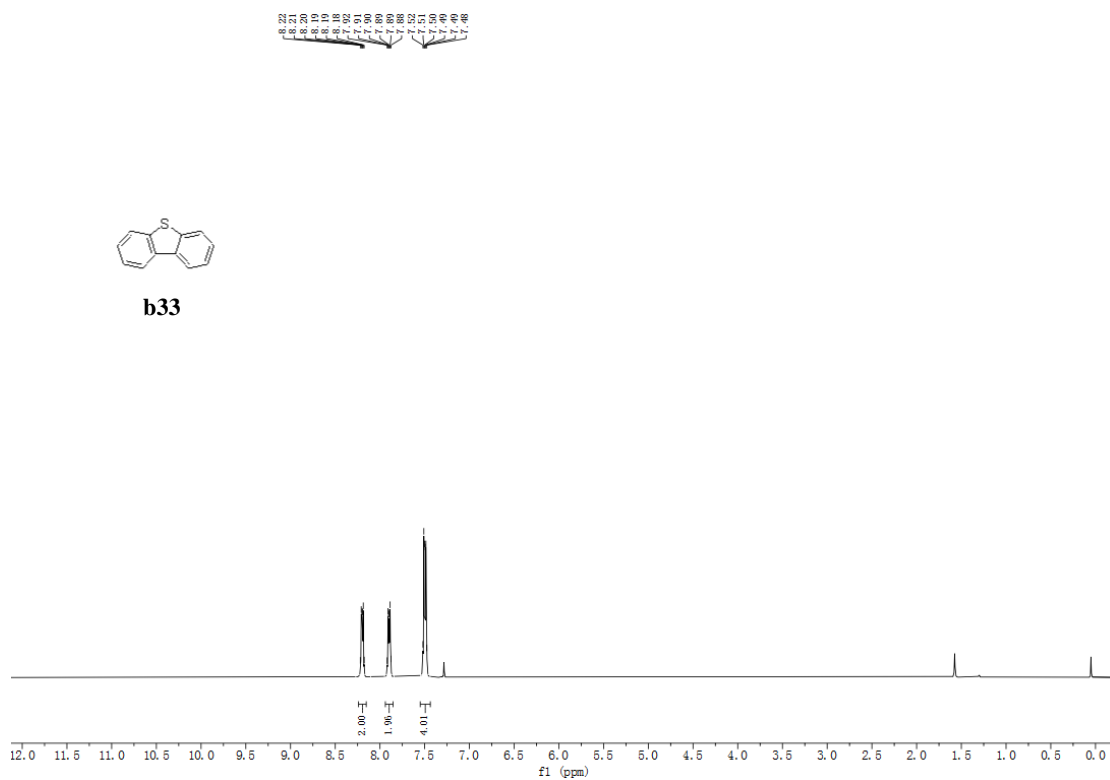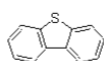

**b33**

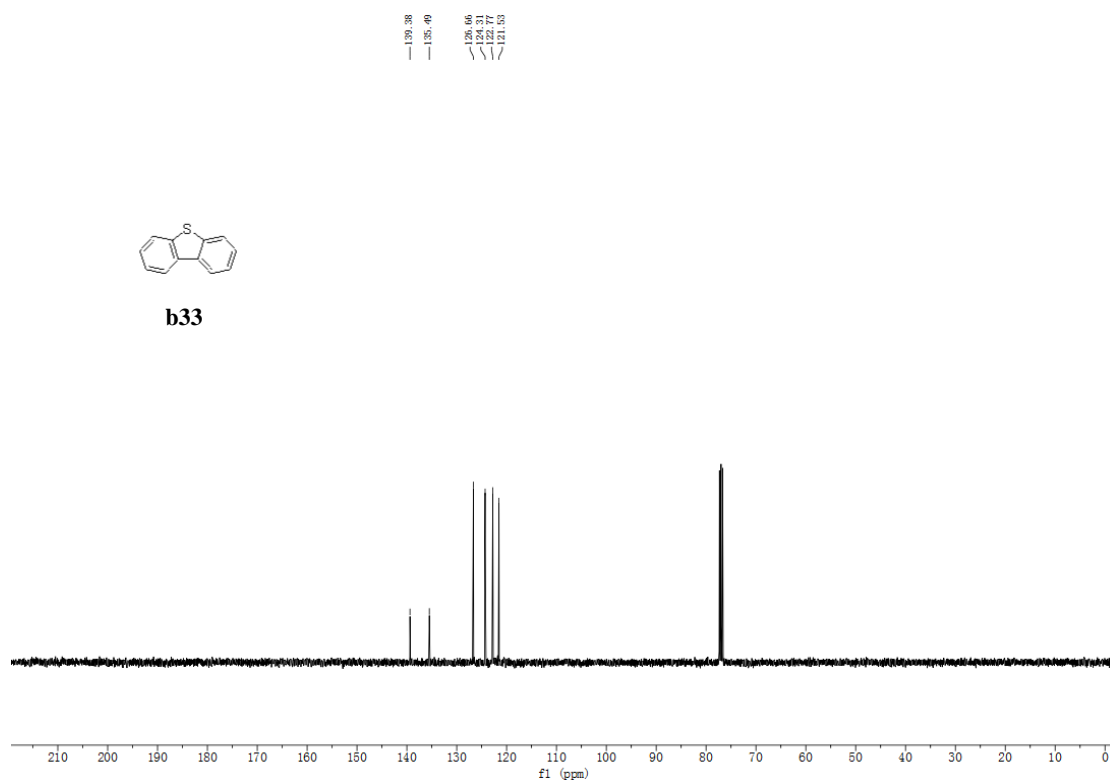



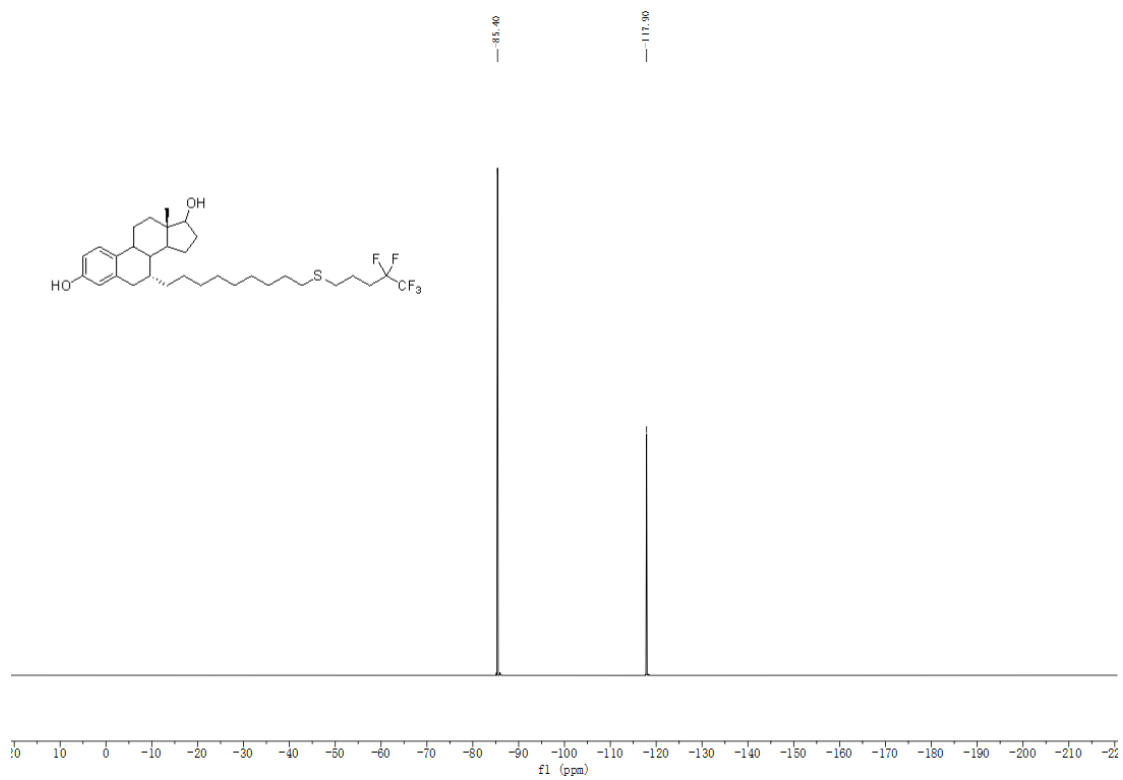

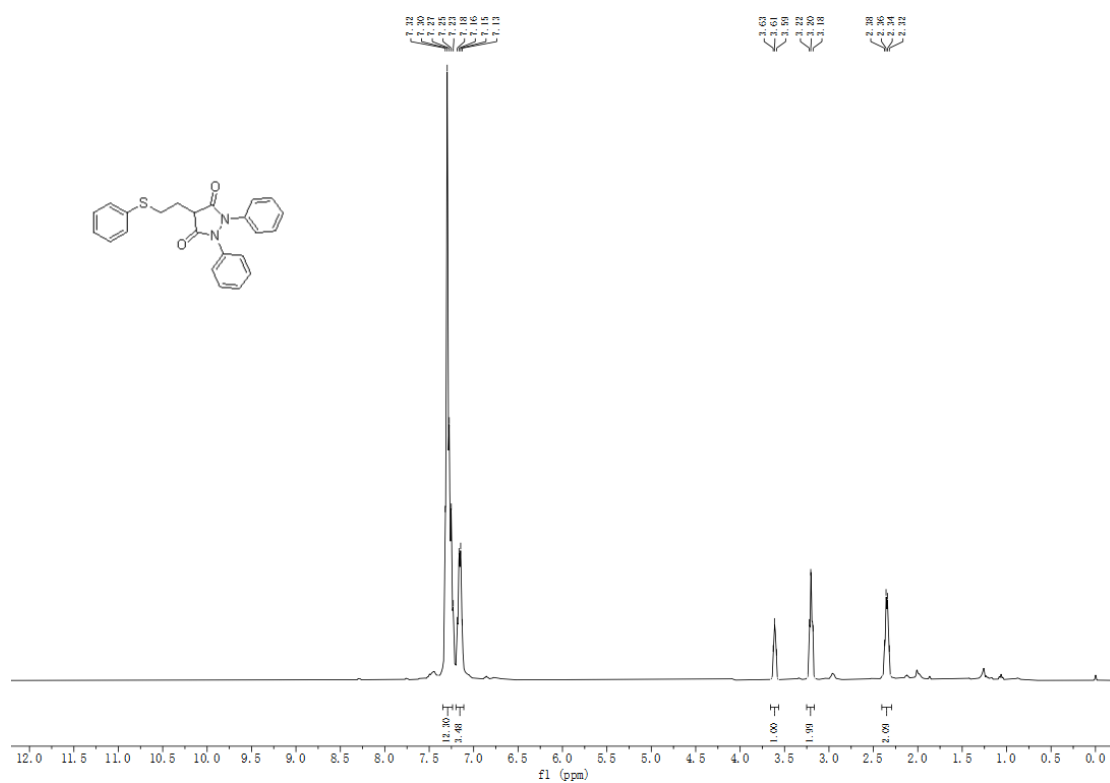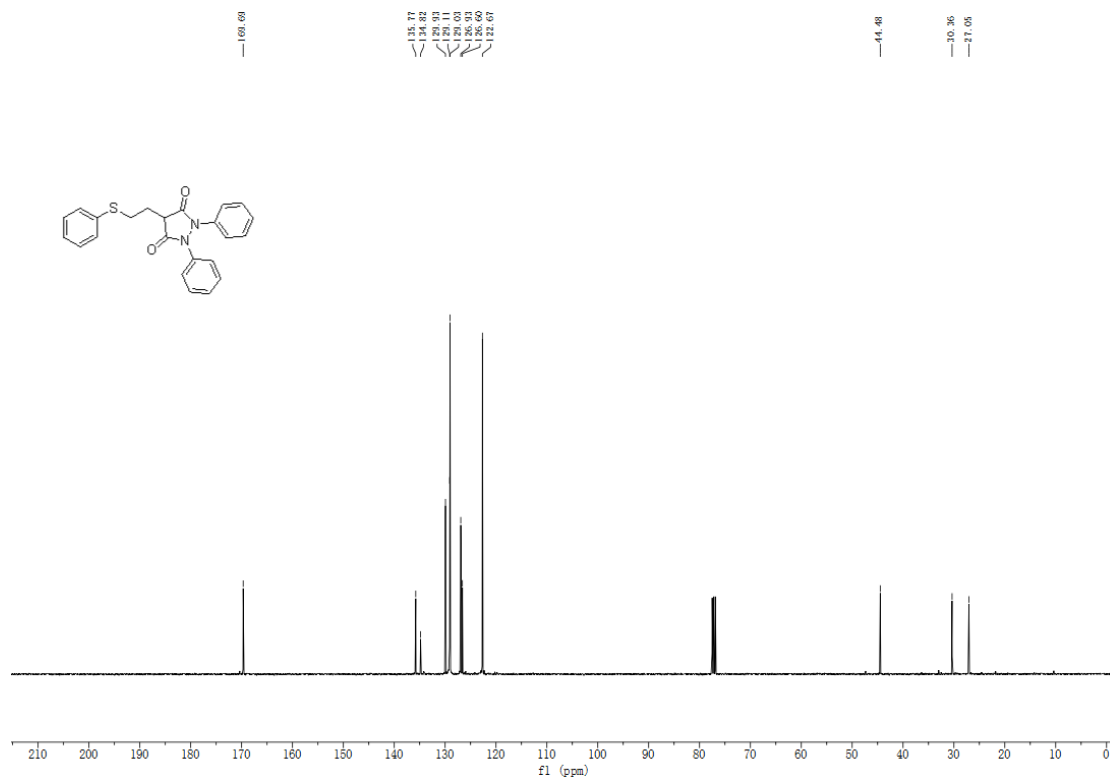

Supplement: d3qo01232h1.pdf [file d3qo01232h1.pdf]
